# Supplementary material for: KB3H8: an environment-friendly reagent for the selective reduction of aldehydes and ketones to alcohols
Source: Royal Society of Chemistry journal article supplement (doi:10.1039/d1cc05638g), 2021-01-01
Supplement: d1cc05638g1.pdf [file d1cc05638g1.pdf]

## Supporting Information

### **KB<sub>3</sub>H<sub>8</sub>: an environmental-friendly reagent for the selective reduction of aldehydes and ketones to alcohols**

Xinying Li,<sup>a</sup> Tongge Mi,<sup>b</sup> Wenjing Guo,<sup>a</sup> Zhongrui Ruan,<sup>a</sup> Yu Guo,<sup>b</sup> Yan-Na Ma,<sup>\*a</sup> Xuenian Chen<sup>\*a</sup>

<sup>a</sup> Green Catalysis Center and College of Chemistry, Zhengzhou University, Zhengzhou, 450001, China.

<sup>b</sup> School of Chemistry and Chemical Engineering, Henan Key Laboratory of Boron Chemistry and Advanced Energy Materials, Henan Normal University, Xixiang, 453007, China.

E-mail: Xuenian\_Chen@zzu.edu.cn; mayanna@zzu.edu.cn.

### Table of Contents

|                                                                                                                                 |     |
|---------------------------------------------------------------------------------------------------------------------------------|-----|
| 1. General methods and materials.....                                                                                           | S2  |
| 2. Synthesis of unsolvated KB <sub>3</sub> H <sub>8</sub> .....                                                                 | S3  |
| 3. Screening of the reaction conditions.....                                                                                    | S4  |
| 4. Crystallographic data and crystal structure of K[B <sub>5</sub> O <sub>6</sub> (OH) <sub>4</sub> ] • 2H <sub>2</sub> O ..... | S5  |
| 5. General procedure for the reduction of aldehydes and ketones to alcohols using KB <sub>3</sub> H <sub>8</sub> .....          | S6  |
| 6. Proposed mechanisms .....                                                                                                    | S7  |
| 7. Characterization data .....                                                                                                  | S8  |
| 8. References .....                                                                                                             | S16 |
| 9. NMR spectra of all the forming alcohol products .....                                                                        | S17 |

## 1. General methods and materials

All reagents were purchased from commercial sources and used without further treatment, unless otherwise indicated. Metal borane  $\text{KB}_3\text{H}_8$  was prepared according to the literature methods<sup>1</sup>. The  $^1\text{H}$  and  $^{13}\text{C}$  NMR spectra were recorded on a Bruker advance III 400 spectrometer in  $\text{CDCl}_3$  with TMS as internal standard. Chemical shifts ( $\delta$ ) were measured in ppm relative to TMS  $\delta = 0$  for  $^1\text{H}$ , or to chloroform  $\delta = 77.0$  for  $^{13}\text{C}$  as internal standard. Data are represented as follows: chemical shift, integration, multiplicity (br = broad, s = singlet, d = doublet, dd = double doublet, t = triplet, q = quartet, m = multiplet), coupling constants in Hertz (Hz). All reactions were monitored by TLC with GF254 silica gel coated plates. Flash column chromatography was carried out using 200-300 mesh silica gel at increased pressure. All solvents were purified according to literature procedures and stored under nitrogen.

Single-crystal X-ray diffraction data were collected on an Agilent Diffraction SuperNova Atlas using  $\text{Cu-K}\alpha$  radiation ( $\lambda = 1.54184 \text{ \AA}$ ). Data reduction was performed using the SAINT software package and an absorption correction was applied using SADABS.<sup>2</sup> The data were corrected for decay, Lorentz, and polarization effects as well as absorption and beam corrections based on the multi-scan technique. The structures were solved by a combination of direct methods in SHELXT and the difference Fourier technique and refined by full-matrix least-squares procedures. Non-hydrogen atoms were refined with anisotropic displacement parameters. The H-atoms were either located or calculated and subsequently treated with a riding model. Crystal data and refinement parameters are summarized in Table S1.

## 2. Synthesis of unsolvated $\text{KB}_3\text{H}_8$ .

The synthesis of unsolvated  $\text{KB}_3\text{H}_8$  is following the literature method:<sup>1</sup> Potassium (5.85 g, 150 mmol) was cut by a scissor into a small piece with the size of  $\sim 3 \times 3 \times 3 \text{ mm}^3$  in a glovebox and added to a 500 mL Schlenk flask. The flask was connected with a Schlenk line into which  $\text{THF} \cdot \text{BH}_3$  (300 mL, 300 mmol) was condensed at  $-78^\circ\text{C}$ . The reaction mixture was stirred at room temperature until potassium was completely consumed and large amount of  $\text{KBH}_4$  white precipitate appeared (about 12 h). The  $\text{KBH}_4$  precipitate was filtered out. Removal of THF from the filtrate resulted in a sticky solid, into which 30 mL toluene was added to produce a white precipitate. Part of the solvent was removed under dynamic vacuum. The precipitate was filtered, washed with toluene ( $3 \times 30 \text{ mL}$ ), and then dried under dynamic vacuum to produce a free-flowing unsolvated  $\text{KB}_3\text{H}_8$  white powder<sup>[1]</sup> (5.40 g  $\text{KB}_3\text{H}_8$ , 90% yield).  $^{11}\text{B}$  NMR (128 MHz,  $\text{CD}_3\text{CN}$ ):  $\delta$  -30.3 (nonet,  $J = 33 \text{ Hz}$ ) ppm.  $^1\text{H}$  NMR (400 MHz,  $\text{CD}_3\text{CN}$ ):  $\delta$  0.11 (decet,  $J = 33 \text{ Hz}$ ) ppm.

### 3. Screening of the reaction conditions

**Table S1.** Screening of the molar ratio of aldehyde/ $\text{KB}_3\text{H}_8$  in water

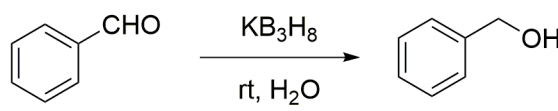

| Entry          | Benzaldehyde (mmol) | $\text{KB}_3\text{H}_8$ (mmol) | Time (h) | Yield <sup>a</sup> |
|----------------|---------------------|--------------------------------|----------|--------------------|
| 1              | 1                   | 1                              | 3        | 94%                |
| 2              | 2                   | 1                              | 5        | 90%                |
| 3              | 3                   | 1                              | 8        | 91%                |
| 4 <sup>b</sup> | 4                   | 1                              | 12       | 70%                |
| 5 <sup>b</sup> | 5                   | 1                              | 36       | 51%                |
| 6 <sup>b</sup> | 6                   | 1                              | 36       | 43%                |
| 7 <sup>b</sup> | 7                   | 1                              | 36       | 35%                |
| 8 <sup>b</sup> | 8                   | 1                              | 36       | 31%                |

<sup>a</sup> Yields were determined by NMR. <sup>b</sup> Unreacted benzaldehyde can be separated from the residue.

**Table S2.** Evaluation of organic solvents for the reduction of benzaldehyde with  $\text{KB}_3\text{H}_8$

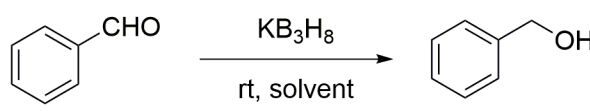

| Entry    | Solvents                 | Time (h) | Yield <sup>a</sup> |
|----------|--------------------------|----------|--------------------|
| 1        | DME                      | 15       | 85                 |
| 2        | $\text{CH}_3\text{CN}$   | 15       | 79                 |
| <b>3</b> | <b>THF</b>               | <b>1</b> | <b>92</b>          |
| 4        | 1,2-dioxane              | 36       | 48                 |
| 5        | $\text{CH}_2\text{Cl}_2$ | 36       | 43                 |
| 6        | $\text{CH}_3\text{OH}$   | 19       | 81                 |

<sup>a</sup> Isolated yields.

**Table S3.** Screening of the molar ratio of aldehydes/ $\text{KB}_3\text{H}_8$  in THF

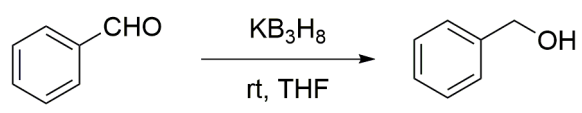

| Entry          | Benzaldehyde (mmol) | $\text{KB}_3\text{H}_8$ (mmol) | Time (h) | Yield <sup>a</sup> |
|----------------|---------------------|--------------------------------|----------|--------------------|
| 1              | 1                   | 1                              | 1        | 94%                |
| 2              | 2                   | 1                              | 3        | 90%                |
| 3              | 3                   | 1                              | 6        | 90%                |
| 4              | 4                   | 1                              | 10       | 85%                |
| 5              | 5                   | 1                              | 12       | 87%                |
| 6              | 6                   | 1                              | 15       | 82%                |
| 7 <sup>b</sup> | 7                   | 1                              | 36       | 79%                |
| 8 <sup>b</sup> | 8                   | 1                              | 36       | 70%                |

<sup>a</sup> Yields were determined by NMR. <sup>b</sup> Unreacted benzaldehyde can be separated from the residue.

#### 4. Crystallographic data and crystal structure of $\text{K}[\text{B}_5\text{O}_6(\text{OH})_4] \cdot 2\text{H}_2\text{O}$

**Table S4.** Crystallographic data and structure refinement results for  $\text{K}[\text{B}_5\text{O}_6(\text{OH})_4] \cdot 2\text{H}_2\text{O}$

|                                        |                                               |
|----------------------------------------|-----------------------------------------------|
| Empirical formula                      | $\text{B}_5\text{H}_8\text{K}_1\text{O}_{12}$ |
| Formula weight                         | 293.21                                        |
| Temp, K                                | 100.15                                        |
| Crystal system                         | orthorhombic                                  |
| Space group                            | Aea2                                          |
| $a$ , Å                                | 11.0495(2)                                    |
| $b$ , Å                                | 11.1733(2)                                    |
| $c$ , Å                                | 8.9600(2)                                     |
| $\alpha$ (°)                           | 90                                            |
| $\beta$ (°)                            | 90                                            |
| $\gamma$ (°)                           | 90                                            |
| Volume, Å <sup>3</sup>                 | 1106.20(4)                                    |
| $Z$                                    | 4                                             |
| $d_{\text{calc}}$ , g cm <sup>-3</sup> | 1.761                                         |
| $\lambda$ , Å                          | 1.54184                                       |
| $\mu$ , mm <sup>-1</sup>               | 4.795                                         |
| Reflections collected                  | 2575                                          |
| Independent reflections                | 848                                           |
| $R_{\text{int}}$                       | 0.0231                                        |
| Goodness-of-fit on $F^2$               | 1.093                                         |
| $R_1$ , $wR_2$ ( $I > 2\sigma(I)$ )    | $R_1 = 0.0227$ , $wR_2 = 0.0586$              |
| $R_1$ , $wR_2$ (all data)              | $R_1 = 0.0227$ , $wR_2 = 0.0586$              |

$${}^a R_1 = \frac{\sum \|F_o\| - |F_c|}{\sum \|F_o\|}; {}^b wR_2 = \left\{ \frac{\sum [w(F_o^2 - F_c^2)^2]}{\sum [w(F_o^2)^2]} \right\}^{1/2}$$

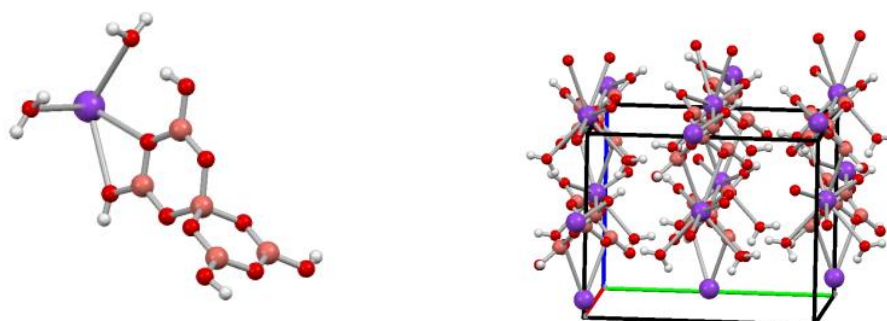

**Figure S1.** Crystal structure of  $\text{K}[\text{B}_5\text{O}_6(\text{OH})_4] \cdot 2\text{H}_2\text{O}$

## 5. General procedure for the reduction of aldehydes and ketones to alcohols using $\text{KB}_3\text{H}_8$

3.1 In water. In a 5 mL flask,  $\text{KB}_3\text{H}_8$  (0.5 mmol) was added to the solution of carbonyl compound (0.5 mmol) in neat water (2 mL) under air atmosphere. Then the reaction mixture was stirred at room temperature for **1-30, 41** or under reflux for **31-40**. The reaction was monitored by TLC. Upon completion, the forming alcohols were extracted with ethyl acetate ( $3 \times 10$  mL) from the reaction mixture. The combined organic extracts were dried over anhydrous magnesium sulfate and concentrated by rotary evaporation, the residue was purified by silica gel column chromatography to obtain the product.

3.2 In THF. In a 5 mL flask,  $\text{KB}_3\text{H}_8$  (0.5 mmol) was added to the solution of carbonyl compound (0.5 mmol) in THF (2 mL) under air atmosphere. Then the reaction mixture was stirred at room temperature for **1-30, 41** or under reflux for **31-40**. The reaction was monitored by TLC. Upon completion, 2 mL  $\text{H}_2\text{O}$  was added and then the forming alcohols were extracted with ethyl acetate ( $3 \times 10$  mL) from the reaction mixture. The combined organic extracts were dried over anhydrous magnesium sulfate and concentrated by rotary evaporation, the residue was purified by silica gel column chromatography to obtain the product.

## 6. Proposed mechanisms

The molar ratio of aldehydes/ $\text{KB}_3\text{H}_8$  screening procedure reveals that three hydrides of  $\text{KB}_3\text{H}_8$  participate in the reduction of aldehydes and ketones in water and six hydrides in THF. So, it is believed that the mechanisms in water and THF are different but they are not fully understood. The proposed mechanisms are depicted in Scheme S1.

In water: firstly, the hydride of the  $\text{B}_3\text{H}_8^-$  anion attacks the carbonyl carbon to form intermediate **I**, which can transform to intermediate **II** by immediately hydrolysis under the effect of water. Intermediate **II** further reacts with aldehydes/ketones following hydrolysis to produce alcohol and  $\text{B}(\text{OH})_3$ ,  $\text{B}(\text{OH})_4^-$  or polyborate. Alternatively, one of the hydrides of each B atom in  $\text{B}_3\text{H}_8^-$  anion interact with the C atom of carbonyl in the same time and then hydrolysis to polyborate.

In THF: all the six terminal hydrides except the two bridge hydrogens can participate in the reduction to form intermediate **IV**, which can be further transformed to alcohol and  $\text{B}(\text{OH})_3$ ,  $\text{B}(\text{OH})_4^-$  or polyborate after hydrolysis. On the other hand, the interactions between all six B-H bonds of the  $\text{B}_3\text{H}_8^-$  anion and the six carbonyl may take place step by step, which can not be ruled out currently.

A: Mechanism in  $\text{H}_2\text{O}$

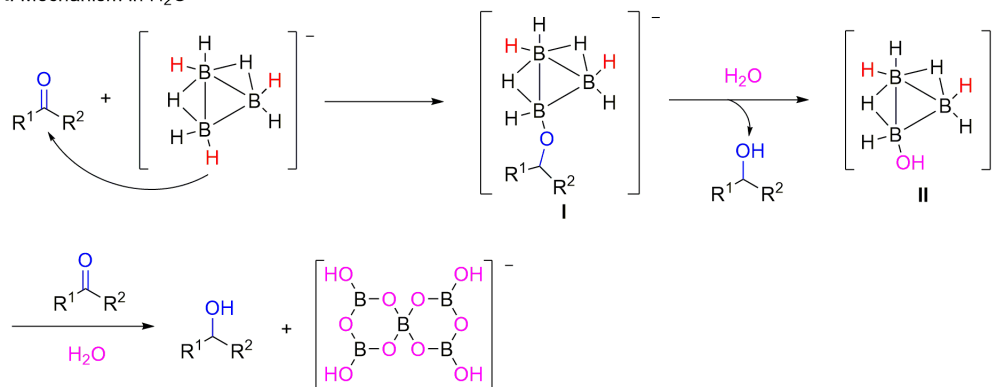

B: Mechanism in THF

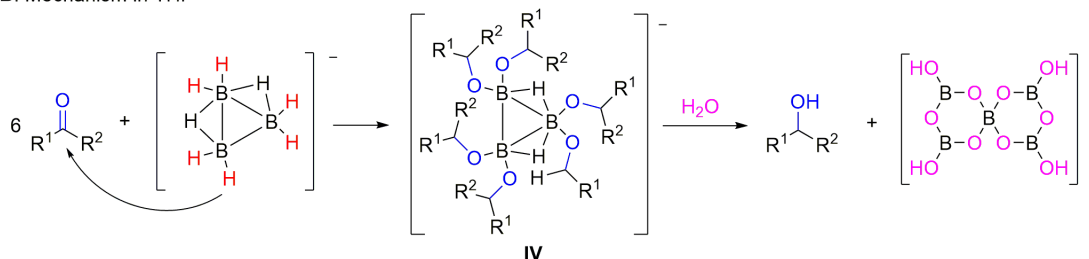

Scheme S1. Proposed mechanisms

## 7. Characterization data

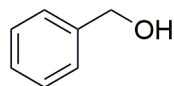

benzyl alcohol (**1**):  $^1\text{H}$  NMR (600 MHz,  $\text{CDCl}_3$ )  $\delta$  7.35-7.31 (m, 3H), 7.28-7.26 (m, 2H), 4.61 (s, 2H), 2.37 (s, 1H);  $^{13}\text{C}$  NMR (151 MHz,  $\text{CDCl}_3$ )  $\delta$  140.79, 128.44, 127.51, 126.91, 65.08.<sup>3</sup>

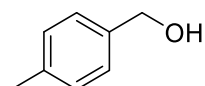

*p*-tolylmethanol (**2**):  $^1\text{H}$  NMR (600 MHz,  $\text{CDCl}_3$ )  $\delta$  7.25 (d,  $J = 7.8$  Hz, 2H), 7.17 (d,  $J = 7.8$  Hz, 2H), 4.64 (s, 2H), 2.35 (s, 3H), 1.73 (s, 1H);  $^{13}\text{C}$  NMR (151 MHz,  $\text{CDCl}_3$ )  $\delta$  137.91, 137.42, 129.26, 127.14, 65.27, 21.15.<sup>3</sup>

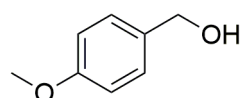

4-methoxybenzyl alcohol (**3**):  $^1\text{H}$  NMR (600 MHz,  $\text{CDCl}_3$ )  $\delta$  7.07 (d,  $J = 8.7$  Hz, 2H), 6.69 (d,  $J = 8.7$  Hz, 2H), 4.33 (s, 1H), 3.60 (s, 3H), 3.40 (s, 1H);  $^{13}\text{C}$  NMR (151 MHz,  $\text{CDCl}_3$ )  $\delta$  158.99, 133.33, 128.63, 113.86, 64.45, 55.25.<sup>3</sup>

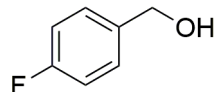

(4-fluorophenyl)methanol (**4**):  $^1\text{H}$  NMR (600 MHz,  $\text{CDCl}_3$ )  $\delta$  7.25 (dd,  $J = 7.8, 5.8$  Hz, 2H), 6.99 (t,  $J = 8.6$  Hz, 2H), 4.54 (s, 2H), 2.89 (s, 1H);  $^{13}\text{C}$  NMR (151 MHz,  $\text{CDCl}_3$ )  $\delta$  162.27 (d,  $J = 244.6$  Hz), 136.57 (d,  $J = 2.7$  Hz), 128.75 (d,  $J = 9.0$  Hz), 115.32 (d,  $J = 22.7$  Hz), 64.31.<sup>3</sup>

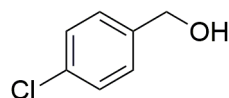

(4-chlorophenyl)methanol (**5**):  $^1\text{H}$  NMR (600 MHz,  $\text{CDCl}_3$ )  $\delta$  7.32-7.31 (m, 2H), 7.28-7.26 (m, 2H), 4.63 (s, 2H), 1.98 (s, 1H);  $^{13}\text{C}$  NMR (151 MHz,  $\text{CDCl}_3$ )  $\delta$  139.20, 133.30, 128.62, 128.23, 64.45.<sup>3</sup>

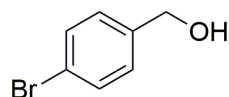

(4-bromophenyl)methanol (**6**):  $^1\text{H}$  NMR (600 MHz,  $\text{CDCl}_3$ )  $\delta$  7.47 (d,  $J = 8.3$  Hz, 2H), 7.22 (d,  $J = 8.2$  Hz, 2H), 4.62 (s, 2H), 1.97 (s, 1H);  $^{13}\text{C}$  NMR (151 MHz,  $\text{CDCl}_3$ )  $\delta$  139.71, 131.57, 128.54, 121.39, 64.48.<sup>3</sup>



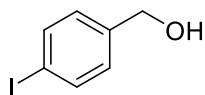

(4-iodophenyl)methanol (**7**):  $^1\text{H NMR}$  (600 MHz,  $\text{CDCl}_3$ )  $\delta$  7.67 (d,  $J = 8.1$  Hz, 2H), 7.09 (d,  $J = 8.0$  Hz, 2H), 4.61 (s, 2H), 1.97 (s, 1H);  $^{13}\text{C NMR}$  (151 MHz,  $\text{CDCl}_3$ )  $\delta$  140.45, 137.60, 128.82, 93.00, 64.61.<sup>11</sup>

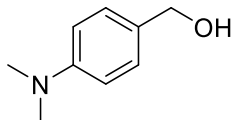

(4-(dimethylamino)phenyl)methanol (**8**):  $^1\text{H NMR}$  (600 MHz,  $\text{CDCl}_3$ )  $\delta$  7.13 (d,  $J = 8.4$  Hz, 2H), 6.63 (d,  $J = 8.6$  Hz, 2H), 4.44 (s, 2H), 2.84 (s, 6H), 1.90 (d,  $J = 10.1$  Hz, 1H);  $^{13}\text{C NMR}$  (151 MHz,  $\text{CDCl}_3$ )  $\delta$  150.39, 129.10, 128.64, 112.75, 65.25, 40.73.<sup>3</sup>

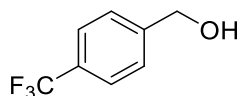

(4-(trifluoromethyl)phenyl)methanol (**9**):  $^1\text{H NMR}$  (400 MHz,  $\text{CDCl}_3$ )  $\delta$  7.60 (d,  $J = 8.1$  Hz, 2H), 7.46 (d,  $J = 8.0$  Hz, 2H), 4.74 (s, 2H), 2.17 (s, 1H);  $^{13}\text{C NMR}$  (101 MHz,  $\text{CDCl}_3$ )  $\delta$  144.72, 129.79 (d,  $J = 32.3$  Hz), 126.83, 125.45 (d,  $J = 4.0$  Hz), 124.17 (d,  $J = 272.7$  Hz), 64.43.<sup>15</sup>

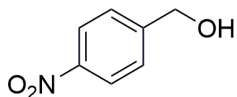

4-nitrobenzyl alcohol (**10**):  $^1\text{H NMR}$  (600 MHz,  $\text{CDCl}_3$ )  $\delta$  8.21 (d,  $J = 8.4$  Hz, 2H), 7.53 (d,  $J = 8.3$  Hz, 2H), 4.84 (d,  $J = 3.3$  Hz, 2H), 2.02 (s, 1H);  $^{13}\text{C NMR}$  (151 MHz,  $\text{CDCl}_3$ )  $\delta$  148.19, 147.23, 126.96, 123.69, 63.93.<sup>3</sup>

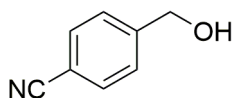

4-cyanobenzyl alcohol (**11**):  $^1\text{H NMR}$  (600 MHz,  $\text{CDCl}_3$ )  $\delta$  7.44 (d,  $J = 7.6$  Hz, 2H), 7.31 (d,  $J = 7.7$  Hz, 2H), 4.57 (s, 2H), 3.90 (d,  $J = 47.7$  Hz, 1H);  $^{13}\text{C NMR}$  (151 MHz,  $\text{CDCl}_3$ )  $\delta$  146.47, 131.77, 126.59, 118.55, 109.94, 63.20.<sup>6</sup>

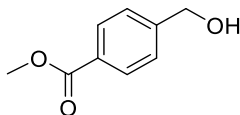

methyl 4-(hydroxymethyl)benzoate (**12**):  $^1\text{H NMR}$  (600 MHz,  $\text{CDCl}_3$ )  $\delta$  8.03 (d,  $J = 8.2$  Hz, 2H), 7.43 (d,  $J = 8.1$  Hz, 2H), 4.77 (s, 2H), 3.92 (s, 3H), 1.90 (s, 1H);  $^{13}\text{C NMR}$  (151 MHz,  $\text{CDCl}_3$ )  $\delta$  166.96, 145.97, 129.86, 129.36, 126.47, 64.71, 52.10.<sup>10</sup>

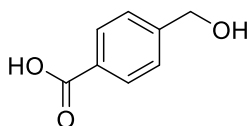

4-(hydroxymethyl)benzoic acid (**13**):  $^1\text{H}$  NMR (400 MHz, DMSO)  $\delta$  12.81 (s, 1H), 7.91 (d,  $J = 8.2$  Hz, 2H), 7.43 (d,  $J = 8.2$  Hz, 2H), 5.34 (s, 1H), 4.58 (s, 2H);  $^{13}\text{C}$  NMR (101 MHz, DMSO)  $\delta$  167.73, 148.30, 129.63, 129.56, 126.65, 62.85.<sup>10</sup>

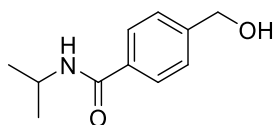

4-(hydroxymethyl)-N-isopropylbenzamide (**14**):  $^1\text{H}$  NMR (600 MHz,  $\text{CDCl}_3$ )  $\delta$  7.58 (d,  $J = 8.2$  Hz, 2H), 7.22 (d,  $J = 8.1$  Hz, 2H), 6.44 (d,  $J = 7.7$  Hz, 1H), 4.60 (d,  $J = 5.9$  Hz, 2H), 4.20 (dq,  $J = 13.3, 6.6$  Hz, 1H), 3.97 (t,  $J = 5.9$  Hz, 1H), 1.21 (d,  $J = 6.6$  Hz, 6H);  $^{13}\text{C}$  NMR (151 MHz,  $\text{CDCl}_3$ )  $\delta$  167.06, 144.77, 133.59, 133.57, 126.95, 126.56, 64.17, 41.97, 22.68.

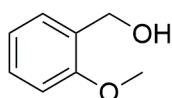

2-methoxybenzyl alcohol (**15**):  $^1\text{H}$  NMR (600 MHz,  $\text{CDCl}_3$ )  $\delta$  7.26-7.23 (m, 2H), 6.92 (t,  $J = 7.4$  Hz, 1H), 6.85 (d,  $J = 8.5$  Hz, 1H), 4.65 (s, 2H), 3.81 (s, 3H), 2.67 (s, 1H);  $^{13}\text{C}$  NMR (151 MHz,  $\text{CDCl}_3$ )  $\delta$  157.20, 129.02, 128.68, 128.47, 120.47, 110.04, 61.61, 61.58, 55.08.<sup>5</sup>

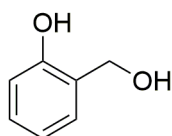

2-hydroxybenzyl alcohol (**16**):  $^1\text{H}$  NMR (600 MHz,  $\text{CDCl}_3$ )  $\delta$  7.40 (s, 1H), 7.23-7.17 (m, 1H), 7.03 (d,  $J = 7.4$  Hz, 1H), 6.90-6.83 (m, 2H), 4.82 (s, 2H), 2.66 (s, 1H);  $^{13}\text{C}$  NMR (151 MHz,  $\text{CDCl}_3$ )  $\delta$  155.85, 129.46, 127.92, 124.73, 120.12, 116.42, 64.39.<sup>4</sup>

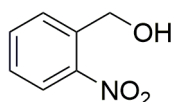

2-nitrobenzyl alcohol (**17**):  $^1\text{H}$  NMR (600 MHz,  $\text{CDCl}_3$ )  $\delta$  8.08 (d,  $J = 8.2$  Hz, 1H), 7.73 (d,  $J = 7.6$  Hz, 1H), 7.70-7.63 (m, 1H), 7.50-7.43 (m, 1H), 4.96 (s, 2H), 2.64 (br, 1H);  $^{13}\text{C}$  NMR (151 MHz,  $\text{CDCl}_3$ )  $\delta$  147.57, 136.77, 134.10, 129.87, 128.44, 124.96, 62.44.<sup>3</sup>

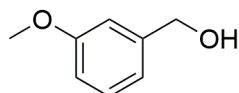

3-methoxybenzyl alcohol (**18**):  $^1\text{H}$  NMR (600 MHz,  $\text{CDCl}_3$ )  $\delta$  7.06 (t,  $J = 7.9$  Hz, 1H), 6.74-6.68 (m, 2H), 6.65-6.61 (m, 1H), 4.37 (s, 2H), 3.60 (s, 1H), 3.57 (s, 3H);  $^{13}\text{C}$  NMR (151 MHz,  $\text{CDCl}_3$ )  $\delta$  159.37, 142.41, 129.16, 118.86, 112.72, 111.93, 64.33, 54.81.<sup>4</sup>

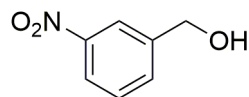

3-nitrobenzyl alcohol (**19**):  $^1\text{H}$  NMR (600 MHz,  $\text{CDCl}_3$ )  $\delta$  8.15 (s, 1H), 8.05 (d,  $J = 7.8$  Hz, 1H), 7.65 (d,  $J = 7.5$  Hz, 1H), 7.48 (t,  $J = 7.9$  Hz, 1H), 4.76 (s, 2H), 3.55 (br, 1H);  $^{13}\text{C}$  NMR (151 MHz,  $\text{CDCl}_3$ )  $\delta$  148.00, 142.84, 132.57, 129.23, 122.14, 121.16, 63.44.<sup>5</sup>

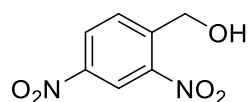

(2,4-dinitrophenyl)methanol (**20**):  $^1\text{H}$  NMR (600 MHz,  $\text{CDCl}_3$ )  $\delta$  8.97 (d,  $J = 2.2$  Hz, 1H), 8.53 (dd,  $J = 8.6, 2.2$  Hz, 1H), 8.15 (d,  $J = 8.6$  Hz, 1H), 5.19 (s, 2H), 2.41 (s, 1H);  $^{13}\text{C}$  NMR (151 MHz,  $\text{CDCl}_3$ )  $\delta$  147.15, 146.93, 143.87, 130.33, 127.96, 120.39, 61.79.<sup>3</sup>

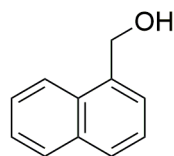

1-naphthalenemethanol (**21**):  $^1\text{H}$  NMR (600 MHz,  $\text{CDCl}_3$ )  $\delta$  8.12 (d,  $J = 8.2$  Hz, 1H), 7.89 (d,  $J = 7.7$  Hz, 1H), 7.82 (d,  $J = 8.2$  Hz, 1H), 7.59-7.48 (m, 3H), 7.45 (dd,  $J = 8.0, 7.1$  Hz, 1H), 5.14 (d,  $J = 4.6$  Hz, 2H), 1.93 (s, 1H);  $^{13}\text{C}$  NMR (151 MHz,  $\text{CDCl}_3$ )  $\delta$  136.22, 133.75, 131.18, 128.63, 128.53, 126.30, 125.84, 125.36, 125.29, 123.60, 63.62.<sup>4</sup>

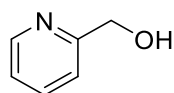

pyridin-2-ylmethanol (**22**):  $^1\text{H}$  NMR (600 MHz,  $\text{CDCl}_3$ )  $\delta$  8.54 (d,  $J = 4.7$  Hz, 1H), 7.68 (m,  $J = 7.7, 1.7$  Hz, 1H), 7.28 (d,  $J = 8.2$  Hz, 1H), 7.23-7.17 (m, 1H), 4.76 (s, 2H), 4.24 (s, 1H);  $^{13}\text{C}$  NMR (151 MHz,  $\text{CDCl}_3$ )  $\delta$  159.29, 148.53, 136.75, 122.34, 120.65, 64.25.<sup>5</sup>

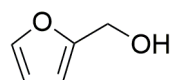

furfuryl alcohol (**23**):  $^1\text{H}$  NMR (600 MHz,  $\text{CDCl}_3$ )  $\delta$  7.39 (d,  $J = 0.9$  Hz, 1H), 6.39-6.22 (m, 2H), 4.59 (s, 2H), 2.12 (s, 1H);  $^{13}\text{C}$  NMR (151 MHz,  $\text{CDCl}_3$ )  $\delta$  153.95, 142.53, 110.31, 107.71, 57.38.<sup>3</sup>

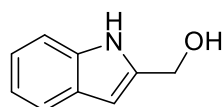

(1H-indol-2-yl)methanol (**24**):  $^1\text{H}$  NMR (600 MHz,  $\text{CDCl}_3$ )  $\delta$  8.34 (s, 1H), 7.55 (d,  $J = 7.8$  Hz, 1H), 7.22-7.17 (m, 1H), 7.15 (t,  $J = 7.5$  Hz, 1H), 7.08 (t,  $J = 7.3$  Hz, 1H), 6.31 (s, 1H), 4.61 (d,  $J = 12.0$  Hz,

2H), 2.70 (s, 1H);  $^{13}\text{C}$  NMR (151 MHz,  $\text{CDCl}_3$ )  $\delta$  137.56, 136.44, 128.04, 122.23, 120.66, 119.98, 111.14, 100.64, 58.46.<sup>12</sup>

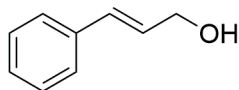

cinnamyl alcohol (**25**):  $^1\text{H}$  NMR (600 MHz,  $\text{CDCl}_3$ )  $\delta$  7.37 (d,  $J = 7.6$  Hz, 2H), 7.30 (t,  $J = 7.6$  Hz, 2H), 7.23 (dd,  $J = 9.5, 5.1$  Hz, 1H), 6.59 (d,  $J = 15.9$  Hz, 1H), 6.34 (m,  $J = 15.9, 5.7$  Hz, 1H), 4.30 (dd,  $J = 5.7, 0.8$  Hz, 2H), 1.95 (s, 1H);  $^{13}\text{C}$  NMR (151 MHz,  $\text{CDCl}_3$ )  $\delta$  136.72, 131.12, 128.62, 128.55, 127.71, 126.50, 63.66.<sup>3</sup>

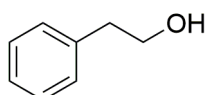

phenethyl alcohol (**26**):  $^1\text{H}$  NMR (600 MHz,  $\text{CDCl}_3$ )  $\delta$  7.23 (t,  $J = 7.4$  Hz, 2H), 7.15 (t,  $J = 8.2$  Hz, 3H), 3.68 (t,  $J = 7.0$  Hz, 2H), 3.12 (s, 1H), 2.74 (t,  $J = 7.0$  Hz, 2H);  $^{13}\text{C}$  NMR (151 MHz,  $\text{CDCl}_3$ )  $\delta$  138.43, 128.71, 128.15, 126.00, 63.09, 38.83.<sup>3</sup>

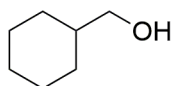

cyclohexanemethanol (**27**):  $^1\text{H}$  NMR (600 MHz,  $\text{CDCl}_3$ )  $\delta$  3.33 (d,  $J = 6.5$  Hz, 2H), 2.51 (s, 1H), 1.75-1.56 (m, 5H), 1.44-1.33 (m, 1H), 1.24-1.03 (m, 3H), 0.91-0.78 (m, 2H);  $^{13}\text{C}$  NMR (151 MHz,  $\text{CDCl}_3$ )  $\delta$  63.38, 40.31, 29.50, 26.49, 25.74.<sup>8</sup>

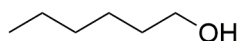

1-hexanol (**28**):  $^1\text{H}$  NMR (600 MHz,  $\text{CDCl}_3$ )  $\delta$  3.61 (d,  $J = 6.8$  Hz, 2H), 1.72 (br, 1H), 1.57-1.52 (m, 2H), 1.36-1.25 (m, 6H), 0.87 (d,  $J = 12.6$  Hz, 3H);  $^{13}\text{C}$  NMR (151 MHz,  $\text{CDCl}_3$ )  $\delta$  62.95, 32.69, 31.59, 25.38, 22.58, 13.96.<sup>9</sup>

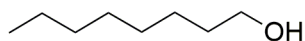

1-octanol (**29**):  $^1\text{H}$  NMR (600 MHz,  $\text{CDCl}_3$ )  $\delta$  3.51 (t,  $J = 6.8$  Hz, 2H), 3.12 (s, 1H), 1.54-1.43 (m, 2H), 1.24 (m,  $J = 19.2, 10.6, 4.5$  Hz, 9H), 0.81 (t,  $J = 7.0$  Hz, 3H);  $^{13}\text{C}$  NMR (151 MHz,  $\text{CDCl}_3$ )  $\delta$  62.48, 32.57, 31.73, 29.34, 29.24, 29.20, 25.69, 22.53, 13.89.<sup>10</sup>

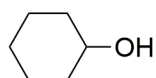

cyclohexanol (**30**):  $^1\text{H}$  NMR (600 MHz,  $\text{CDCl}_3$ )  $\delta$  3.59 (td,  $J = 9.0, 4.2$  Hz, 1H), 1.86 (dd,  $J = 23.4, 18.2$  Hz, 2H), 1.79-1.59 (m, 3H), 1.59-1.47 (m, 1H), 1.31-1.08 (m, 6H);  $^{13}\text{C}$  NMR (151 MHz,  $\text{CDCl}_3$ )

$\delta$  70.26, 35.49, 25.41, 24.10.<sup>3</sup>

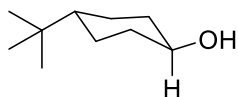

4-(*tert*-butyl)cyclohexan-1-ol (**31**): <sup>1</sup>H NMR (400 MHz, CDCl<sub>3</sub>)  $\delta$  3.53 (m, 1H), 2.06-1.98 (m, 2H), 1.84-1.76 (m, 2H), 1.22 (m, 2H), 1.12-0.97 (m, 3H), 0.87 (s, 9H); <sup>13</sup>C NMR (101 MHz, CDCl<sub>3</sub>)  $\delta$  71.24, 47.20, 36.10, 32.28, 27.65, 25.61.<sup>13</sup>

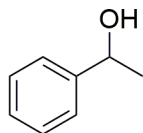

1-phenethylalcohol (**32**): <sup>1</sup>H NMR (600 MHz, CDCl<sub>3</sub>)  $\delta$  7.20 (dd,  $J$  = 10.1, 3.3 Hz, 4H), 7.17-7.11 (m, 1H), 4.69 (q,  $J$  = 6.5 Hz, 1H), 2.57 (s, 1H), 1.33 (d,  $J$  = 6.5 Hz, 3H); <sup>13</sup>C NMR (151 MHz, CDCl<sub>3</sub>)  $\delta$  145.75, 128.29, 127.22, 125.29, 70.08, 24.98.<sup>4</sup>

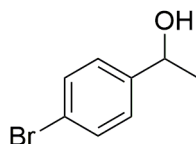

1-(4-bromophenyl)ethanol (**33**): <sup>1</sup>H NMR (600 MHz, CDCl<sub>3</sub>)  $\delta$  7.31 (d,  $J$  = 8.4 Hz, 2H), 7.06 (d,  $J$  = 8.4 Hz, 2H), 4.64 (q,  $J$  = 6.5 Hz, 1H), 2.92 (s, 1H), 1.28 (d,  $J$  = 6.6 Hz, 3H); <sup>13</sup>C NMR (151 MHz, CDCl<sub>3</sub>)  $\delta$  144.61, 131.30, 127.02, 120.87, 69.39, 25.00.<sup>3</sup>

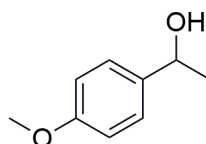

1-(4-methoxyphenyl)ethanol (**34**): <sup>1</sup>H NMR (600 MHz, CDCl<sub>3</sub>)  $\delta$  7.16-7.05 (m, 2H), 6.75-6.65 (m, 2H), 4.63 (q,  $J$  = 6.4 Hz, 1H), 3.62 (s, 3H), 2.91 (s, 1H), 1.29 (d,  $J$  = 6.6 Hz, 3H); <sup>13</sup>C NMR (151 MHz, CDCl<sub>3</sub>)  $\delta$  158.80, 138.27, 126.73, 113.77, 69.68, 55.24, 25.09.<sup>3</sup>

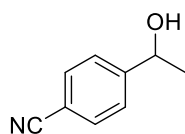

4-(1-hydroxyethyl)benzotrile (**35**): <sup>1</sup>H NMR (600 MHz, CDCl<sub>3</sub>)  $\delta$  7.62 (d,  $J$  = 8.3 Hz, 2H), 7.48 (d,  $J$  = 8.1 Hz, 2H), 4.95 (q,  $J$  = 6.2 Hz, 1H), 2.41 (s, 1H), 1.49 (d,  $J$  = 6.5 Hz, 3H); <sup>13</sup>C NMR (151 MHz, CDCl<sub>3</sub>)  $\delta$  151.24, 132.33, 126.09, 118.89, 110.94, 69.59, 25.38.<sup>15</sup>

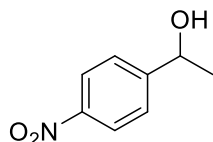

1-(4-nitrophenyl)ethan-1-ol (**36**):  $^1\text{H NMR}$  (600 MHz,  $\text{CDCl}_3$ )  $\delta$  8.09 (d,  $J = 8.7$  Hz, 2H), 7.45 (d,  $J = 8.7$  Hz, 2H), 4.93 (q,  $J = 6.4$  Hz, 1H), 2.38 (s, 1H), 1.43 (d,  $J = 6.6$  Hz, 3H);  $^{13}\text{C NMR}$  (151 MHz,  $\text{CDCl}_3$ )  $\delta$  153.21, 147.12, 126.14, 123.73, 69.46, 25.45.<sup>14</sup>

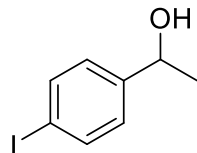

1-(4-iodophenyl)ethan-1-ol (**37**):  $^1\text{H NMR}$  (600 MHz,  $\text{CDCl}_3$ )  $\delta$  7.59 (d,  $J = 8.3$  Hz, 2H), 7.04 (d,  $J = 8.1$  Hz, 2H), 4.76 (q,  $J = 6.3$  Hz, 1H), 1.95 (s, 1H), 1.38 (d,  $J = 6.5$  Hz, 3H);  $^{13}\text{C NMR}$  (151 MHz,  $\text{CDCl}_3$ )  $\delta$  145.48, 137.54, 127.43, 92.72, 69.85, 25.23.<sup>16</sup>

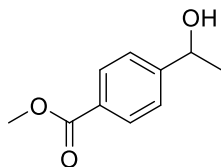

methyl 4-(1-hydroxyethyl)benzoate (**38**):  $^1\text{H NMR}$  (600 MHz,  $\text{CDCl}_3$ )  $\delta$  8.00 (d,  $J = 8.0$  Hz, 2H), 7.43 (d,  $J = 8.2$  Hz, 2H), 4.94 (q,  $J = 6.3$  Hz, 1H), 3.90 (s, 3H), 1.49 (d,  $J = 6.5$  Hz, 3H).  $^{13}\text{C NMR}$  (151 MHz,  $\text{CDCl}_3$ )  $\delta$  167.02, 150.99, 129.84, 129.16, 125.30, 69.95, 52.10, 25.29.<sup>14</sup>

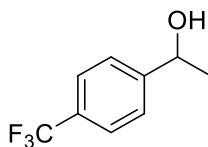

1-(4-(trifluoromethyl)phenyl)ethan-1-ol (**39**):  $^1\text{H NMR}$  (400 MHz,  $\text{CDCl}_3$ )  $\delta$  7.60 (d,  $J = 8.0$  Hz, 2H), 7.48 (d,  $J = 8.0$  Hz, 2H), 4.96 (q,  $J = 6.4$  Hz, 1H), 2.03 (s, 1H), 1.50 (d,  $J = 6.5$  Hz, 3H);  $^{13}\text{C NMR}$  (101 MHz,  $\text{CDCl}_3$ )  $\delta$  149.70, 129.64 (d,  $J = 32.3$  Hz), 125.65, 125.45 (d,  $J = 4.0$  Hz), 124.17 (d,  $J = 272.7$  Hz), 69.83, 25.38.<sup>15</sup>

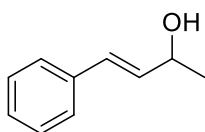

(E)-4-phenylbut-3-en-2-ol (**40**):  $^1\text{H NMR}$  (600 MHz,  $\text{CDCl}_3$ )  $\delta$  7.35 (d,  $J = 7.6$  Hz, 2H), 7.29 (t,  $J = 7.6$  Hz, 2H), 7.22 (t,  $J = 7.2$  Hz, 1H), 6.53 (d,  $J = 15.9$  Hz, 1H), 6.24 (dd,  $J = 15.9, 6.4$  Hz, 1H), 4.45 (p,  $J = 6.4$  Hz, 1H), 2.15 (s, 1H), 1.35 (d,  $J = 6.4$  Hz, 3H);  $^{13}\text{C NMR}$  (151 MHz,  $\text{CDCl}_3$ )  $\delta$  136.66, 133.54, 129.23, 128.49, 127.51, 126.37, 68.74, 23.31.<sup>5</sup>

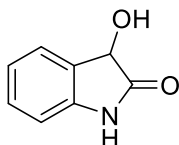

3-hydroxyindolin-2-one (**41**):  $^1\text{H NMR}$  (400 MHz, DMSO)  $\delta$  10.21 (s, 1H), 7.28 (d,  $J = 7.3$  Hz, 1H), 7.20 (t,  $J = 7.7$  Hz, 1H), 6.96 (t,  $J = 7.5$  Hz, 1H), 6.79 (d,  $J = 7.7$  Hz, 1H), 6.16 (d,  $J = 7.6$  Hz, 1H), 4.83

(d,  $J = 7.5$  Hz, 1H);  $^{13}\text{C}$  NMR (101 MHz, DMSO)  $\delta$  177.97, 142.19, 129.32, 128.94, 124.79, 121.52, 109.50, 69.19.<sup>17</sup>

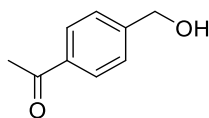

1-(4-(hydroxymethyl)phenyl)ethan-1-one (**42**):  $^1\text{H}$  NMR (600 MHz,  $\text{CDCl}_3$ )  $\delta$  7.95-7.89 (m, 2H), 7.48-7.40 (m, 2H), 4.76 (d,  $J = 2.9$  Hz, 2H), 2.58 (dd,  $J = 2.9, 2.1$  Hz, 3H);  $^{13}\text{C}$  NMR (151 MHz,  $\text{CDCl}_3$ )  $\delta$  198.18, 198.12, 146.45, 146.40, 136.27, 136.23, 128.61, 126.62, 64.50, 64.46, 26.61.<sup>10</sup>

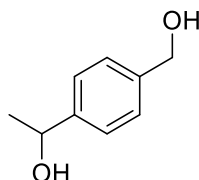

1-(4-(hydroxymethyl)phenyl)ethan-1-ol (**43**):  $^1\text{H}$  NMR (400 MHz,  $\text{CDCl}_3$ )  $\delta$  7.36-7.22 (m, 4H), 4.84 (q,  $J = 6.4$  Hz, 1H), 4.60 (s, 2H), 1.46 (d,  $J = 6.5$  Hz, 3H);  $^{13}\text{C}$  NMR (101 MHz,  $\text{CDCl}_3$ )  $\delta$  145.14, 140.03, 127.12, 125.56, 70.01, 64.71, 25.11.<sup>18</sup>

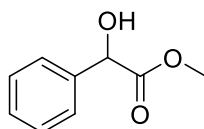

methyl 2-hydroxy-2-phenylacetate (**44**):  $^1\text{H}$  NMR (600 MHz,  $\text{CDCl}_3$ )  $\delta$  7.34 (d,  $J = 7.2$  Hz, 2H), 7.28 (t,  $J = 7.3$  Hz, 2H), 7.24 (dd,  $J = 8.5, 5.8$  Hz, 1H), 5.10 (d,  $J = 2.9$  Hz, 1H), 3.67 (s, 3H), 3.49 (d,  $J = 3.3$  Hz, 1H);  $^{13}\text{C}$  NMR (151 MHz,  $\text{CDCl}_3$ )  $\delta$  174.13, 138.29, 128.63, 128.52, 126.62, 72.94, 52.99.<sup>3</sup>

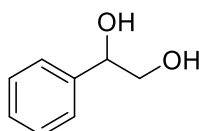

1-phenylethane-1,2-diol (**45**):  $^1\text{H}$  NMR (400 MHz,  $\text{CDCl}_3$ )  $\delta$  7.43-7.24 (m, 5H), 4.79 (dd,  $J = 8.2, 3.0$  Hz, 1H), 3.74-3.61 (m, 2H), 3.57 (s,  $J = 30.5$  Hz, 2H);  $^{13}\text{C}$  NMR (101 MHz,  $\text{CDCl}_3$ )  $\delta$  140.54, 128.50, 127.91, 126.11, 74.74, 68.04.<sup>3</sup>

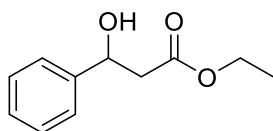

ethyl 3-hydroxy-3-phenylpropanoate (**46**):  $^1\text{H}$  NMR (400 MHz,  $\text{CDCl}_3$ )  $\delta$  7.41-7.22 (m, 5H), 5.13 (dd,  $J = 8.7, 3.9$  Hz, 1H), 4.17 (q,  $J = 7.1$  Hz, 2H), 2.73 (m,  $J = 10.4, 6.4$  Hz, 2H), 1.25 (t,  $J = 7.1$  Hz, 3H);  $^{13}\text{C}$  NMR (101 MHz,  $\text{CDCl}_3$ )  $\delta$  172.43, 142.56, 128.55, 127.81, 125.72, 70.38, 60.92, 43.41, 14.14.<sup>3</sup>

## 8. References

1. X. M. Chen, N. N. Ma, X. R. Liu, C. Wei, C. C. Cui, B. L. Cao, Y. Guo, L. S. Wang, Q. Gu and X. N. Chen, *Angew. Chem. Int. Ed.*, 2019, **58**, 2720.
2. a) SADABS: Area-Detector Absorption Correction, Bruker, Madison, Wisconsin, **2001**; b) TWINABS, Bruker, Madison, Wisconsin, **2001**; c) SAINT: SAX Area-Detector Integration Program, Bruker, Madison, Wisconsin, **2008**; d) XPREP, Bruker, Madison, Wisconsin, **2008**.
3. L. Shi, Y. Liu, Q. Liu, B. Wei and G. Zhang, *Green Chem.*, 2012, **14**, 1372.
4. Y. Liu, S. He, Z. Quan, H. Cai, Y. Zhao and B. Wang, *Green Chem.*, 2019, **21**, 830.
5. J. Chang, F. Fang, J. Zhang and X. Chen, *Adv. Synth. Catal.*, 2020, **362**, 2709.
6. Y.-N. Duan, X. Du, Z. Cui, Y. Zeng, Y. Liu, T. Yang, J. Wen and X. Zhang, *J. Am. Chem. Soc.*, 2019, **141**, 20424.
7. P. V. Ramachandran, A. S. Kulkarni, Y. Zhao and J. Mei, *Chem. Commun.*, 2016, **52**, 11885.
8. S. Vidal, J. Marco-Martínez, S. Filippone and N. Martín, *Chem. Commun.*, 2017, **53**, 4842.
9. Z. Shao, R. Zhong, R. Ferraccioli, Y. Li and Q. Liu, *Chin. J. Chem.*, 2019, **37**, 1125.
10. Z. Yang, Z. Zhu, R. Luo, X. Qiu, J. Liu, J.-K. Yang and W. Tang, *Green Chem.*, 2017, **19**, 3296.
11. A. Tran-Van, S. Götz, M. Neuburger and H. A. Wegner, *Org. Lett.*, 2014, **16**, 2410.
12. H. Mora-Rado, L. Sotorrios, M. P. Ball-Jones, L. Bialy, W. Czechtizky, M. Mendez, E. Gomez-Bengoia and J. P. A. Harrity, *Chem. Eur. J.*, 2018, **24**, 9530.
13. A. Sarkar and H. Banichul, *Energy Sources, Part A: Recovery, Utilization, and Environmental Effects*, 2013, **35**, 352.
14. Y. L. Sun, C. R. Lu, B. Zhao and M.Q. Xue, *J. Org. Chem.*, 2020, **85**, 10504.
15. S. Wang, H. Huang, S. Tsareva, C. Bruneau and C. Fischmeister, *Adv. Synth. Catal.*, 2019, **361**, 786.
16. A. Passera and A. Mezzetti, *Angew. Chem. Int. Ed.*, 2020, **59**, 187.
17. M. Dick, N. S. Sarai, M. W. Martynowycz, T. Gonen, and F. H. Arnold, *J. Am. Chem. Soc.*, 2019, **141**, 19817.
18. R. Kumar and N. Thirupathi, *RSC Adv.*, 2017, **7**, 33890.



## 9. NMR spectra of all the forming alcohol products

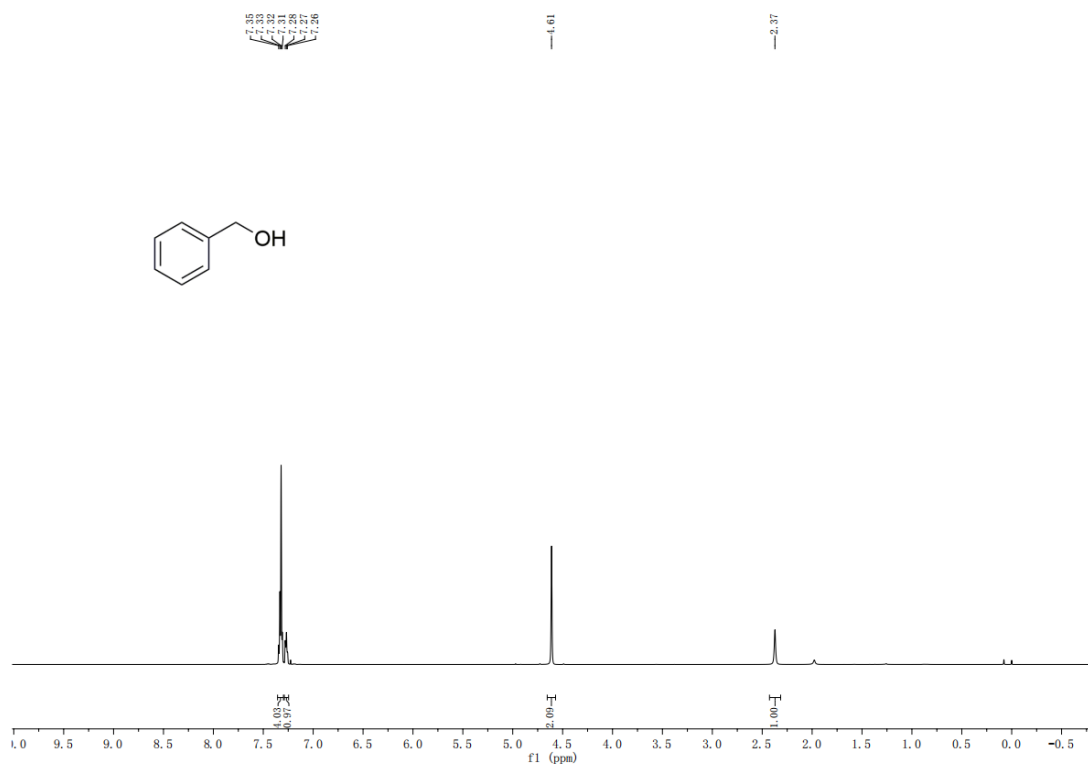

<sup>1</sup>H NMR spectrum of **1** (600MHz, CDCl<sub>3</sub>)

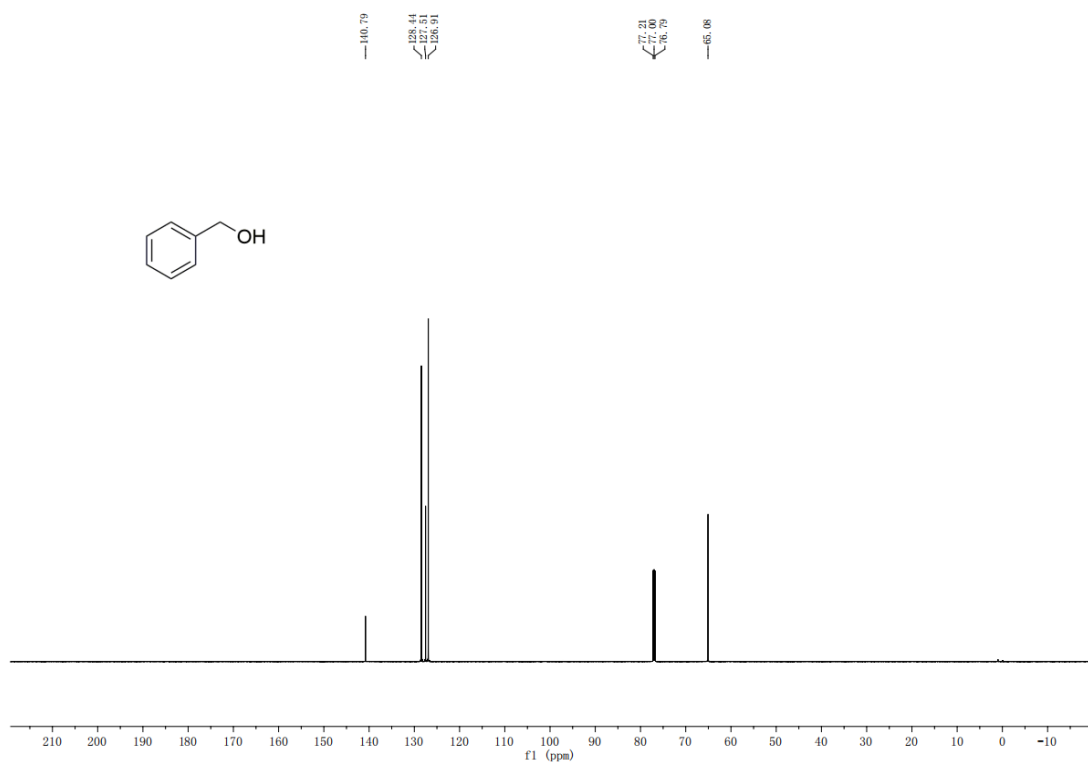

<sup>13</sup>C NMR spectrum of **1** (151MHz, CDCl<sub>3</sub>)

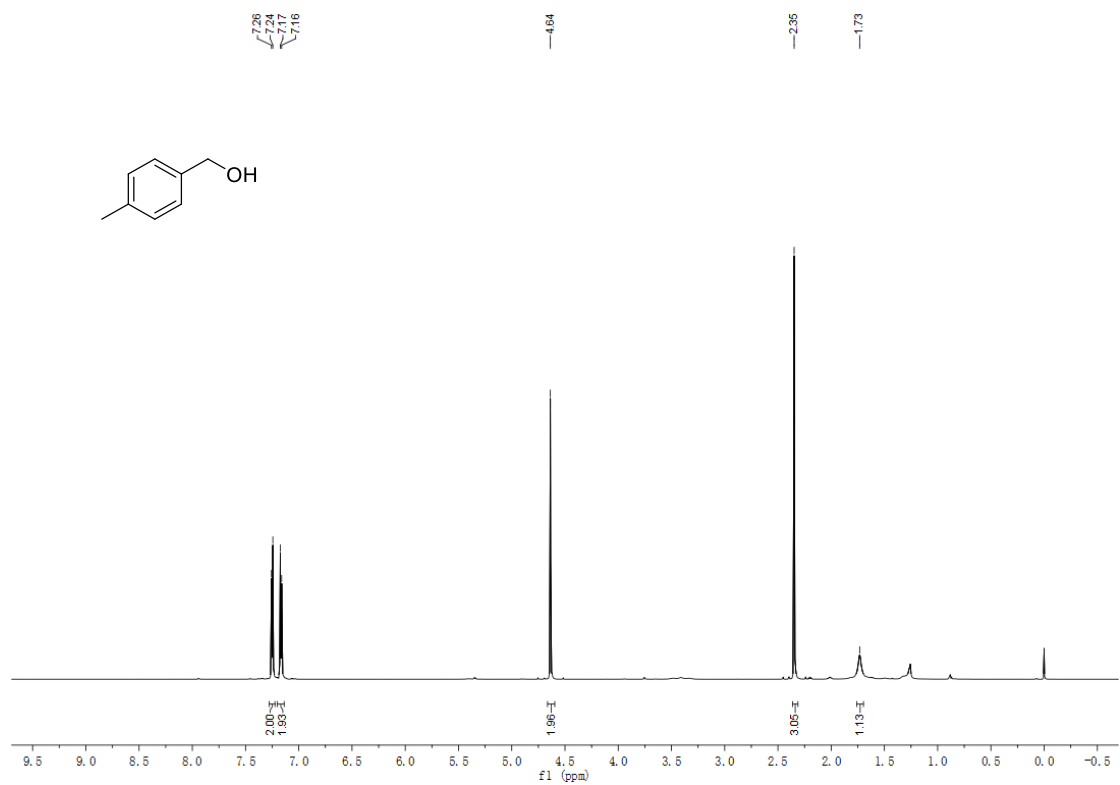

<sup>1</sup>H NMR spectrum of **2** (600MHz, CDCl<sub>3</sub>)

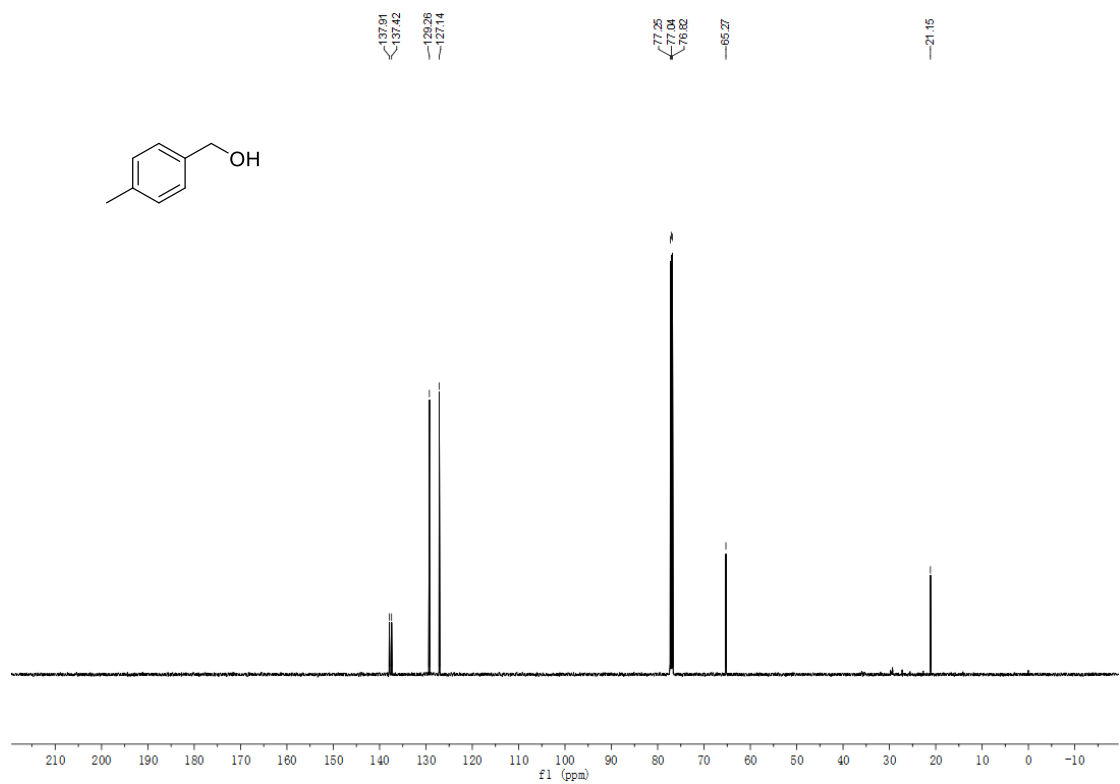

<sup>13</sup>C NMR spectrum of **2** (151MHz, CDCl<sub>3</sub>)

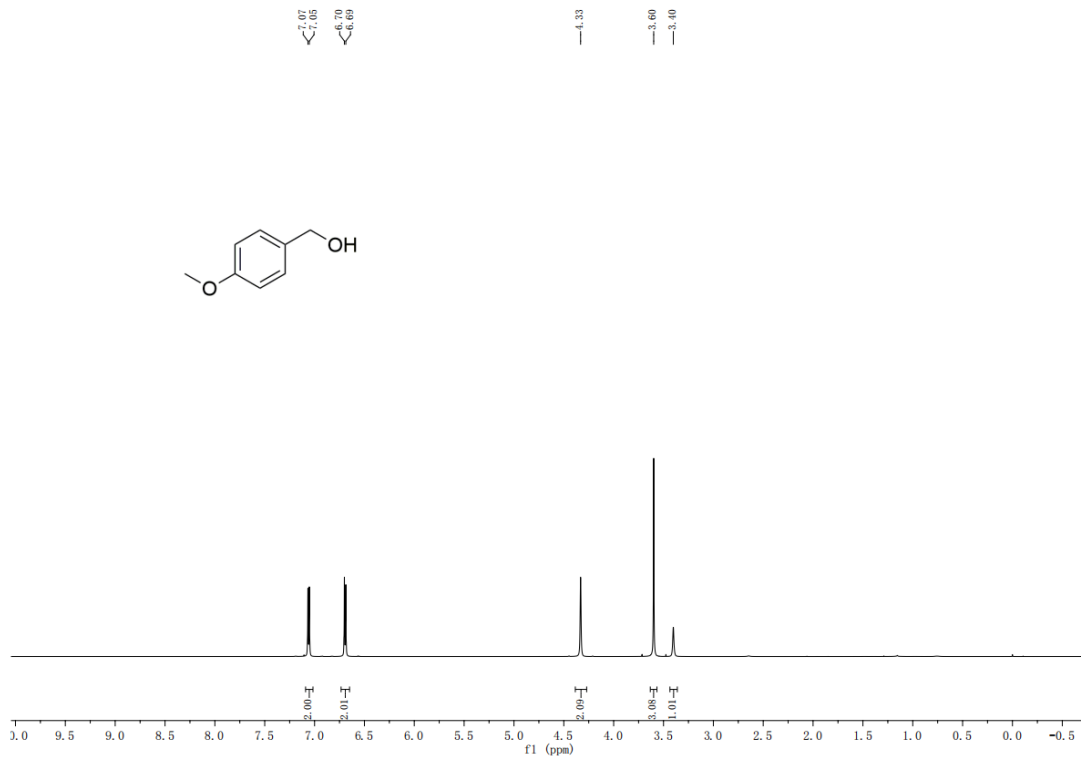

$^1\text{H}$  NMR spectrum of **3** (600MHz,  $\text{CDCl}_3$ )

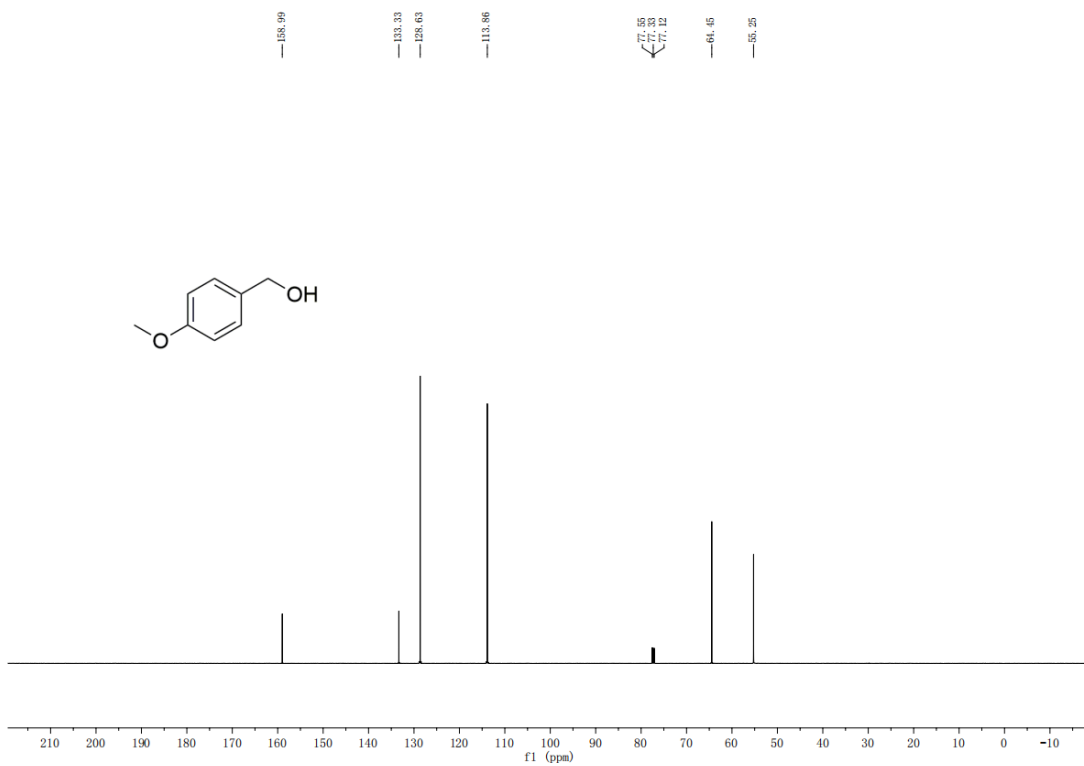

$^{13}\text{C}$  NMR spectrum of **3** (151MHz,  $\text{CDCl}_3$ )

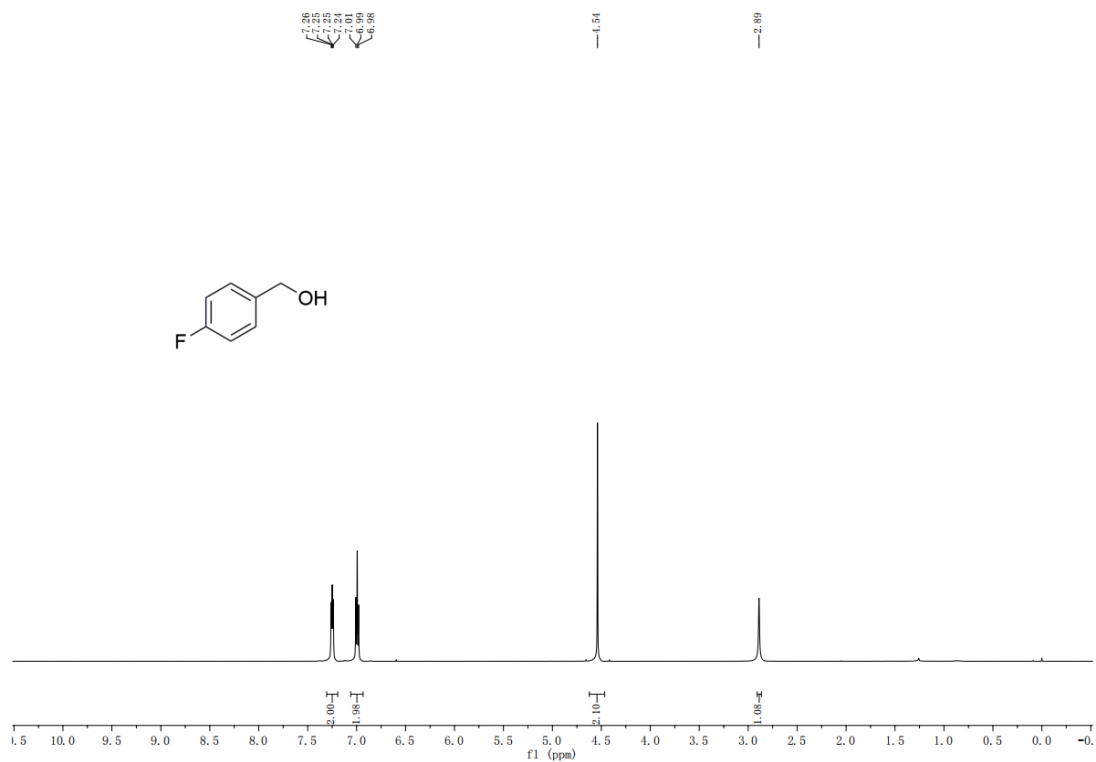

<sup>1</sup>H NMR spectrum of **4** (600MHz, CDCl<sub>3</sub>)

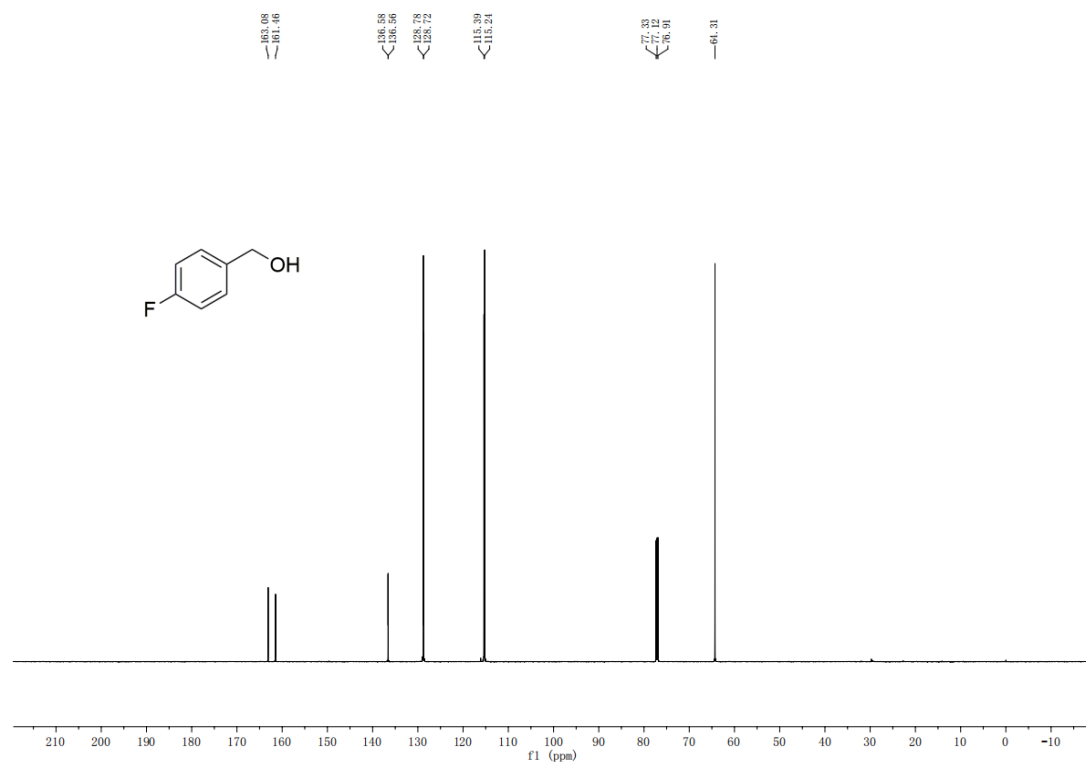

<sup>13</sup>C NMR spectrum of **4** (151MHz, CDCl<sub>3</sub>)

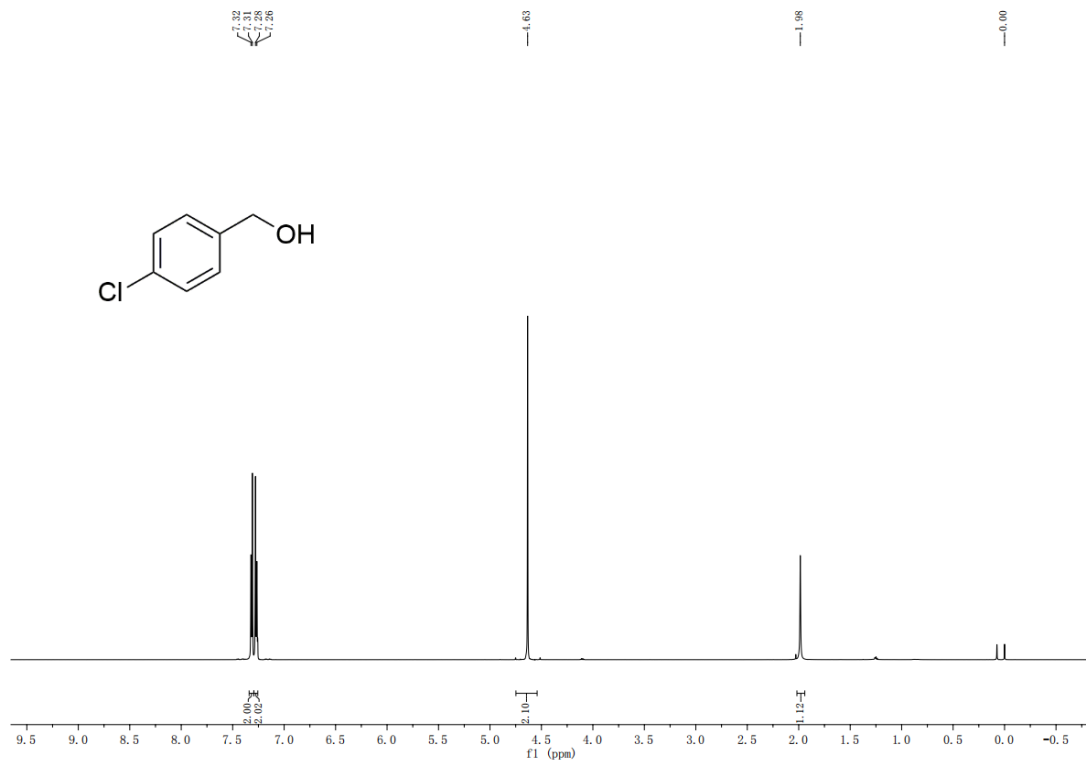

$^1\text{H}$  NMR spectrum of **5** (600MHz,  $\text{CDCl}_3$ )

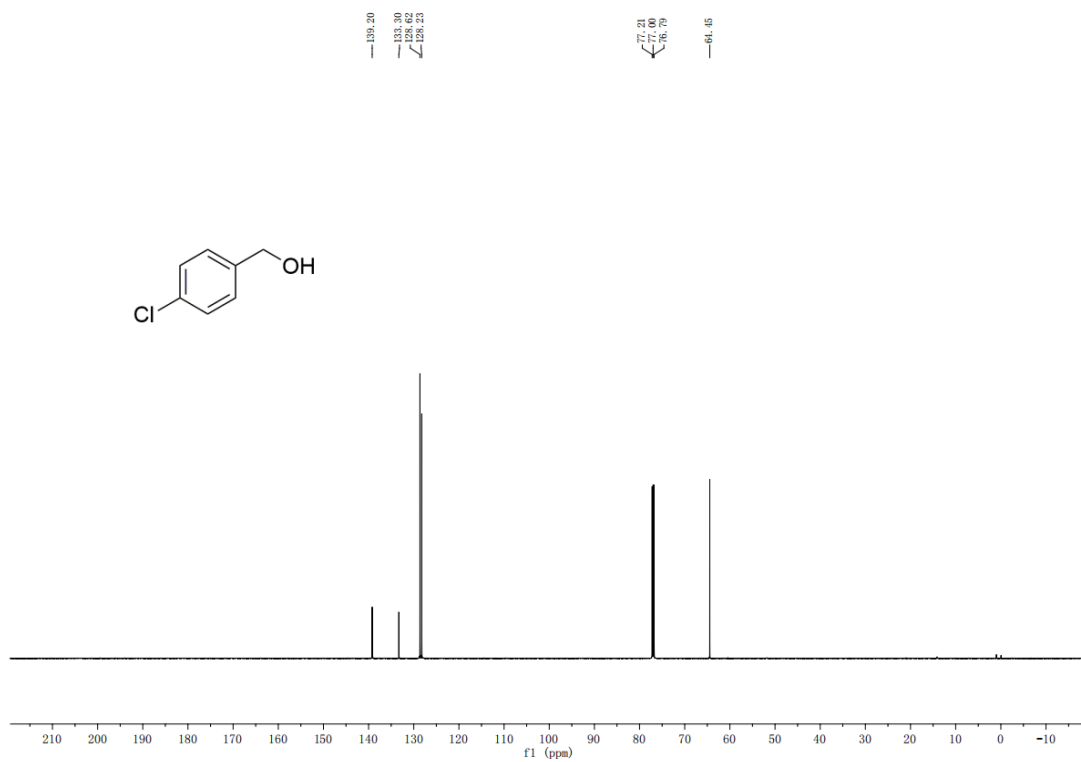

$^{13}\text{C}$  NMR spectrum of **5** (151MHz,  $\text{CDCl}_3$ )

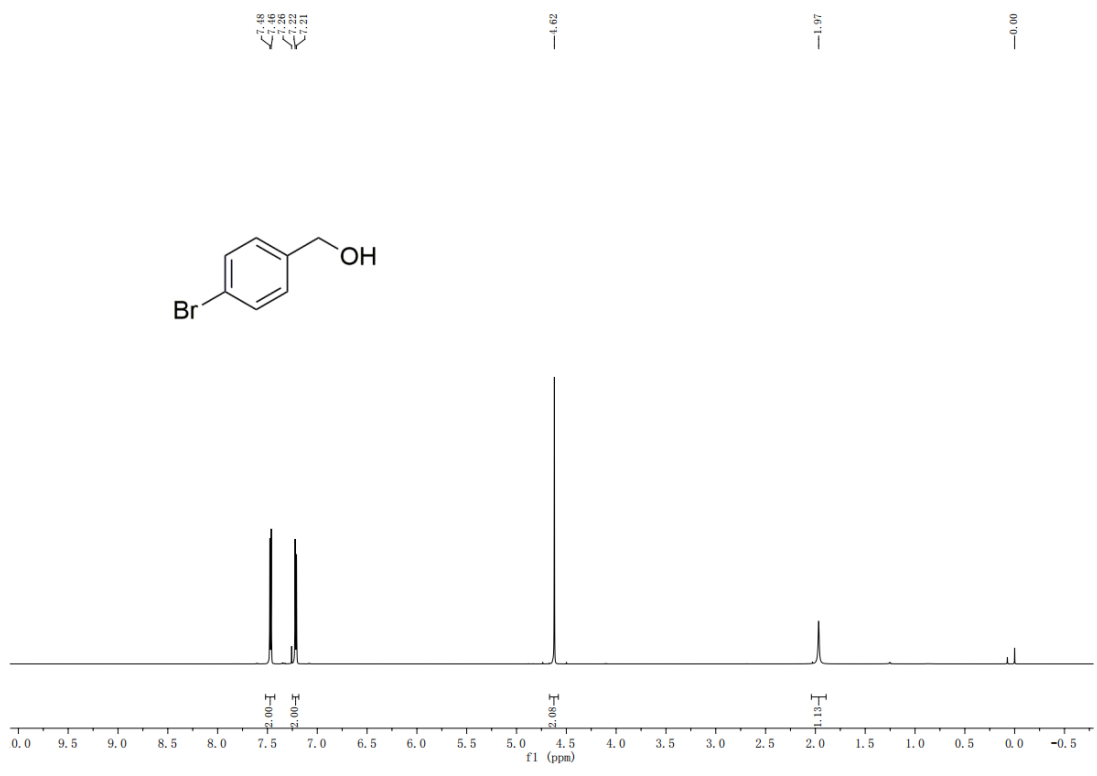

<sup>1</sup>H NMR spectrum of **6** (600MHz, CDCl<sub>3</sub>)

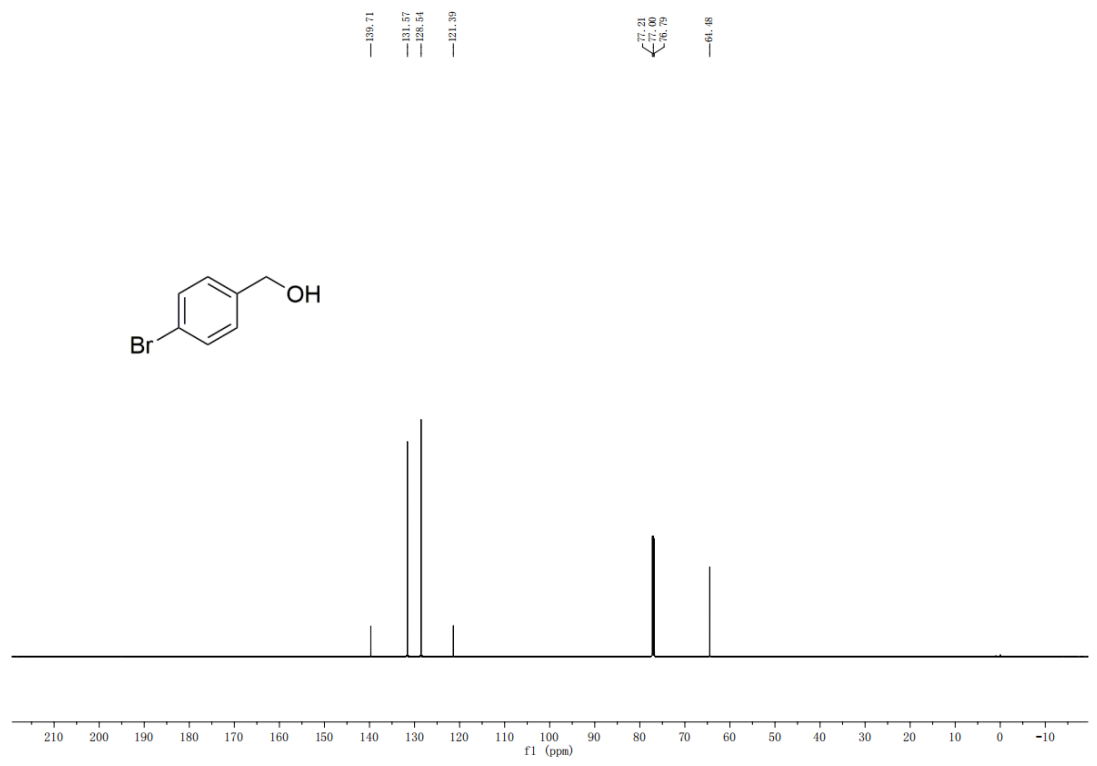

<sup>13</sup>C NMR spectrum of **6** (151MHz, CDCl<sub>3</sub>)

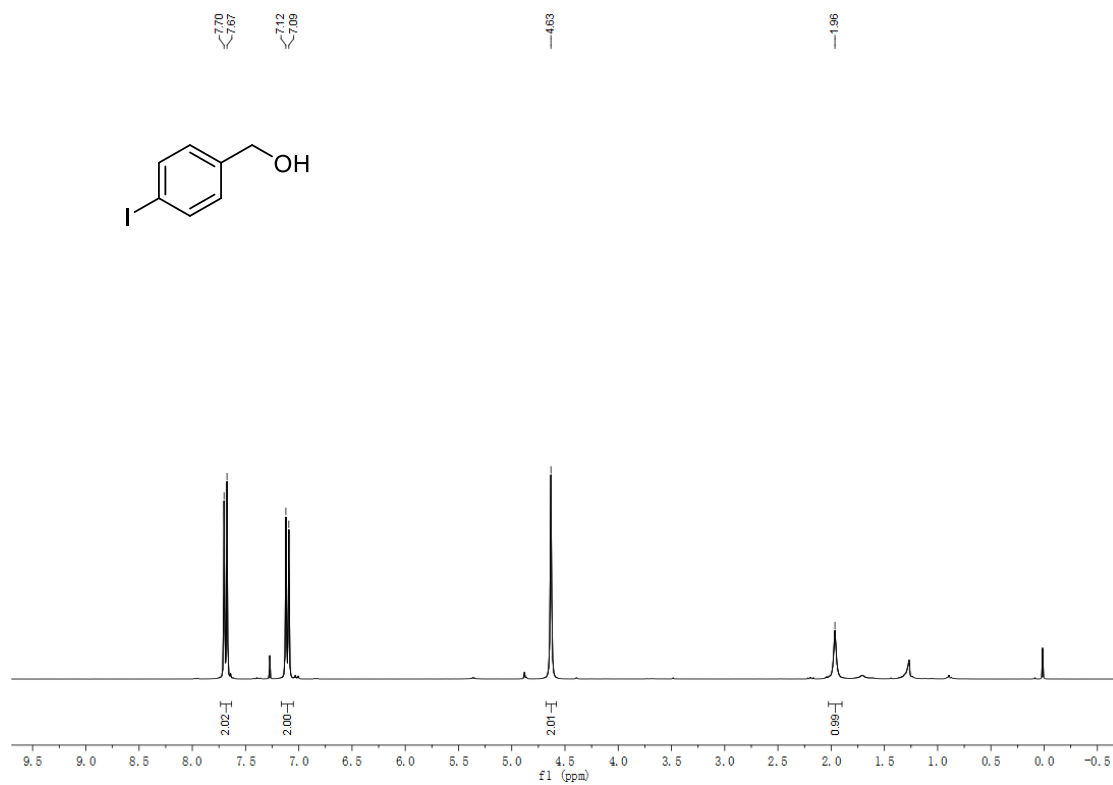

<sup>1</sup>H NMR spectrum of 7 (600MHz, CDCl<sub>3</sub>)

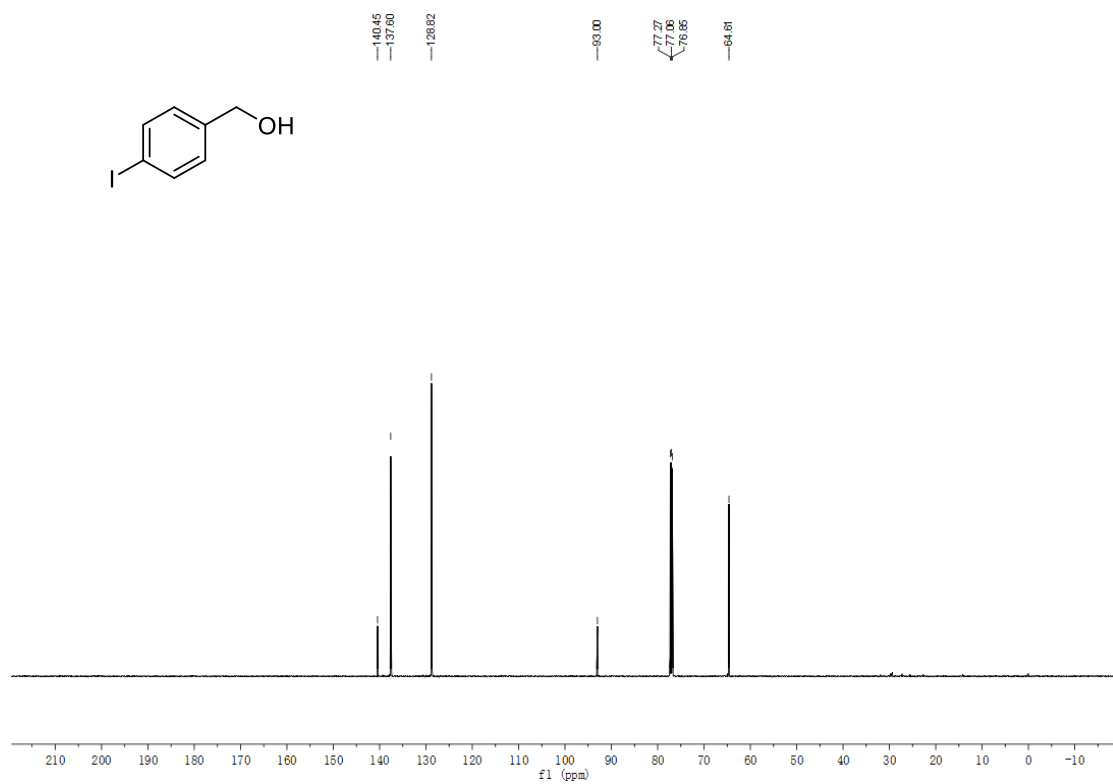

<sup>13</sup>C NMR spectrum of 7 (151MHz, CDCl<sub>3</sub>)

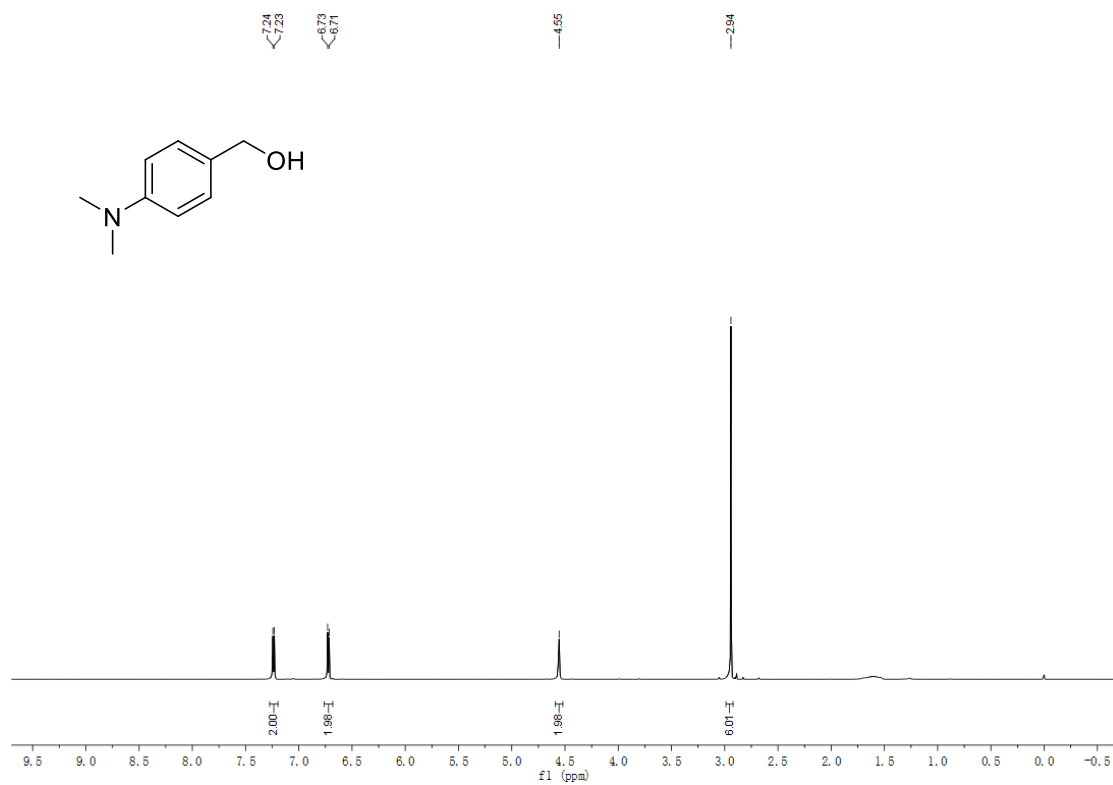

<sup>1</sup>H NMR spectrum of **8** (600MHz, CDCl<sub>3</sub>)

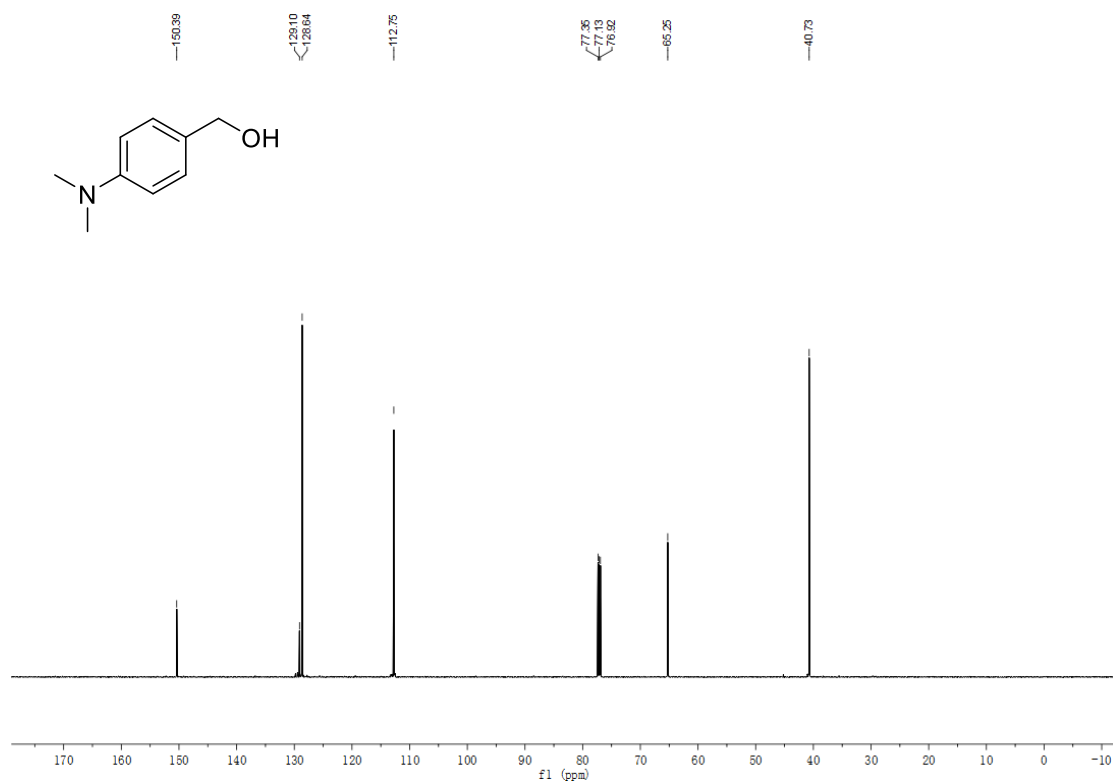

<sup>13</sup>C NMR spectrum of **8** (151MHz, CDCl<sub>3</sub>)



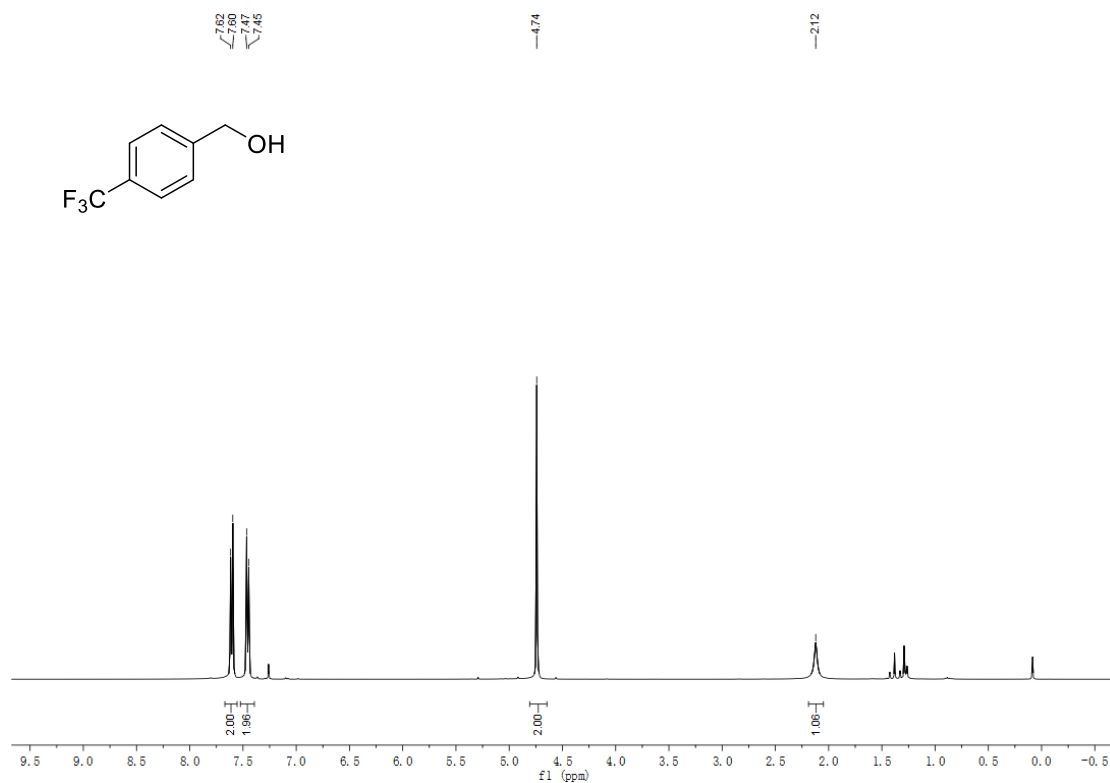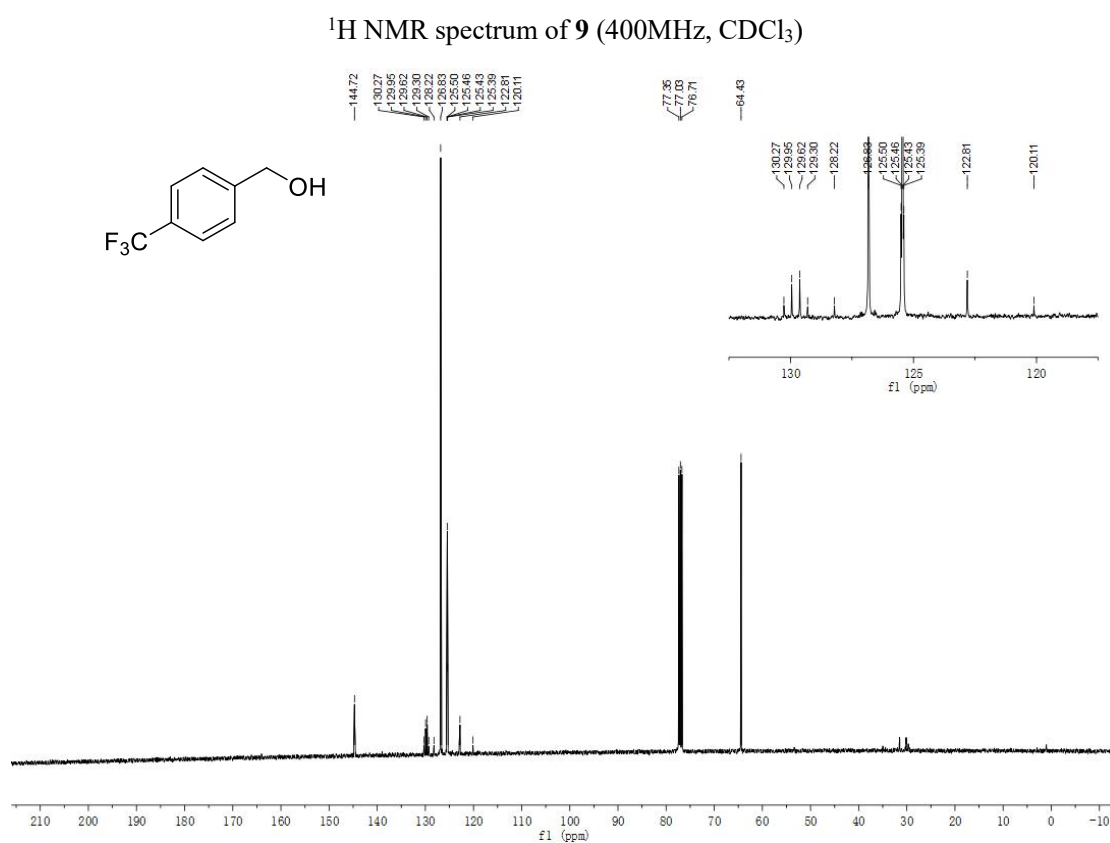

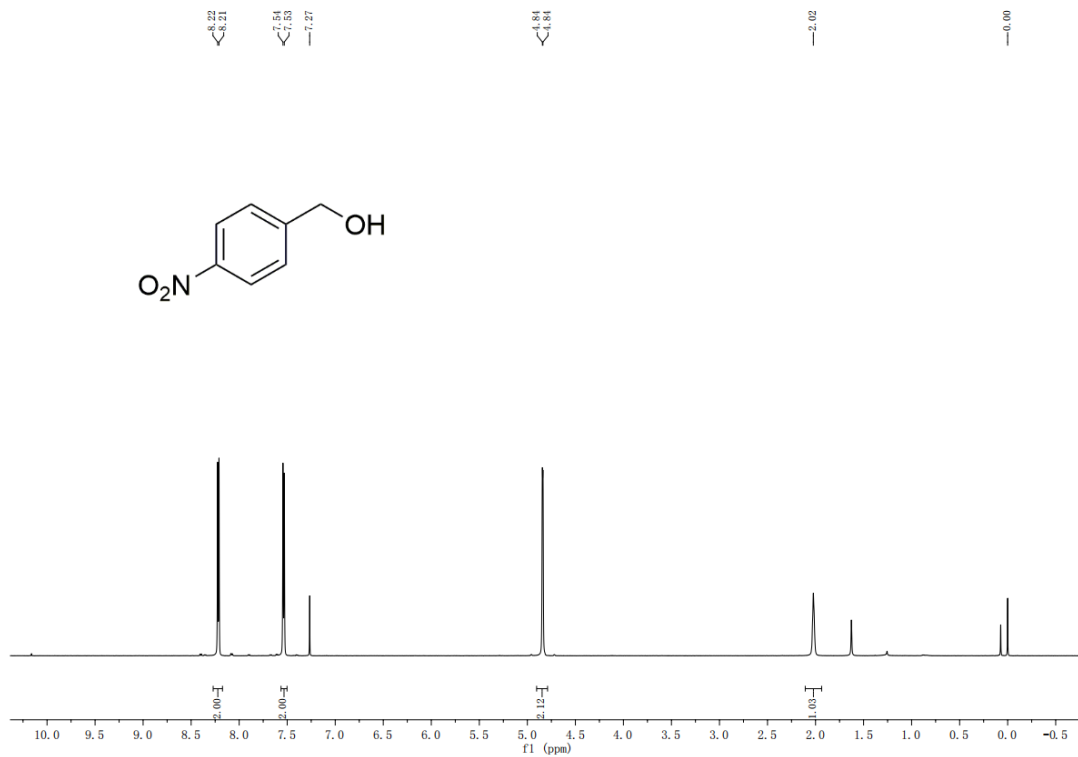

$^1\text{H}$  NMR spectrum of **10** (600MHz,  $\text{CDCl}_3$ )

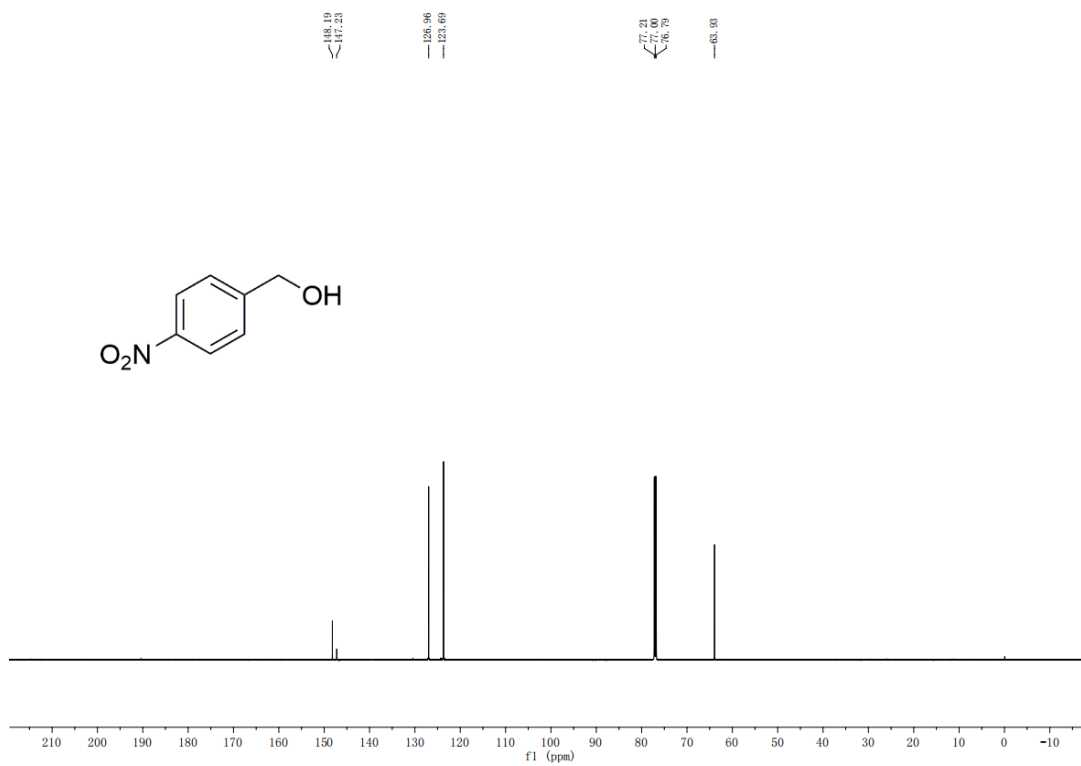

$^{13}\text{C}$  NMR spectrum of **10** (151MHz,  $\text{CDCl}_3$ )

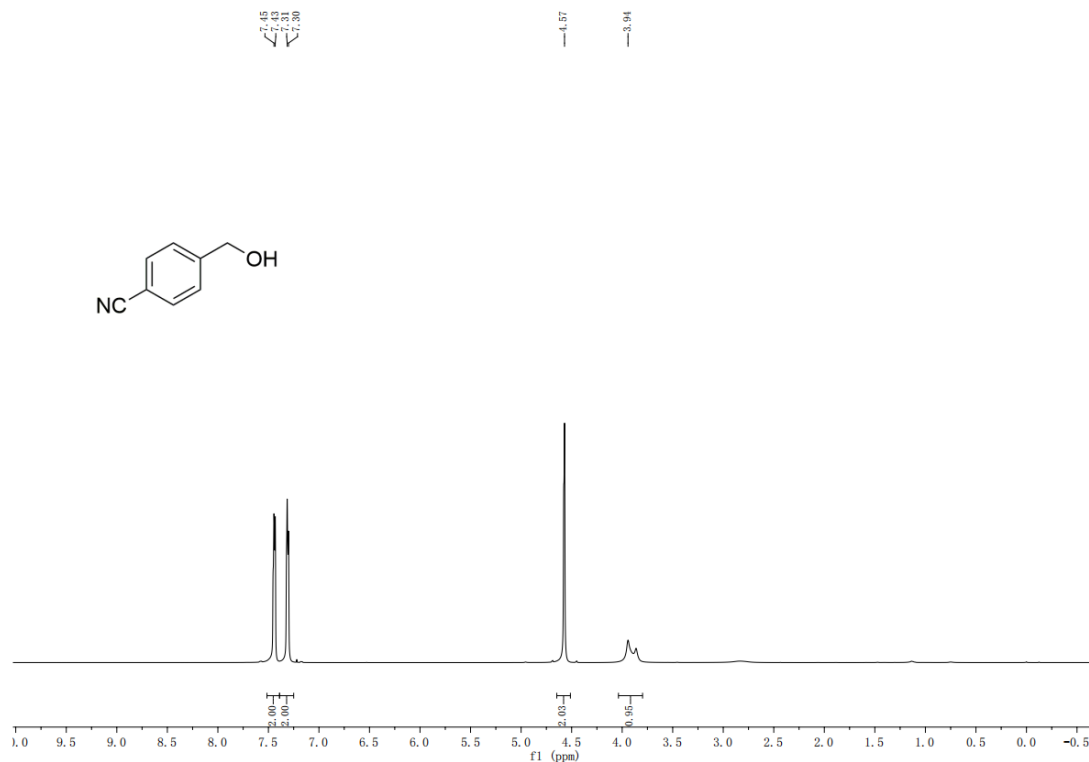

<sup>1</sup>H NMR spectrum of **11** (600MHz, CDCl<sub>3</sub>)

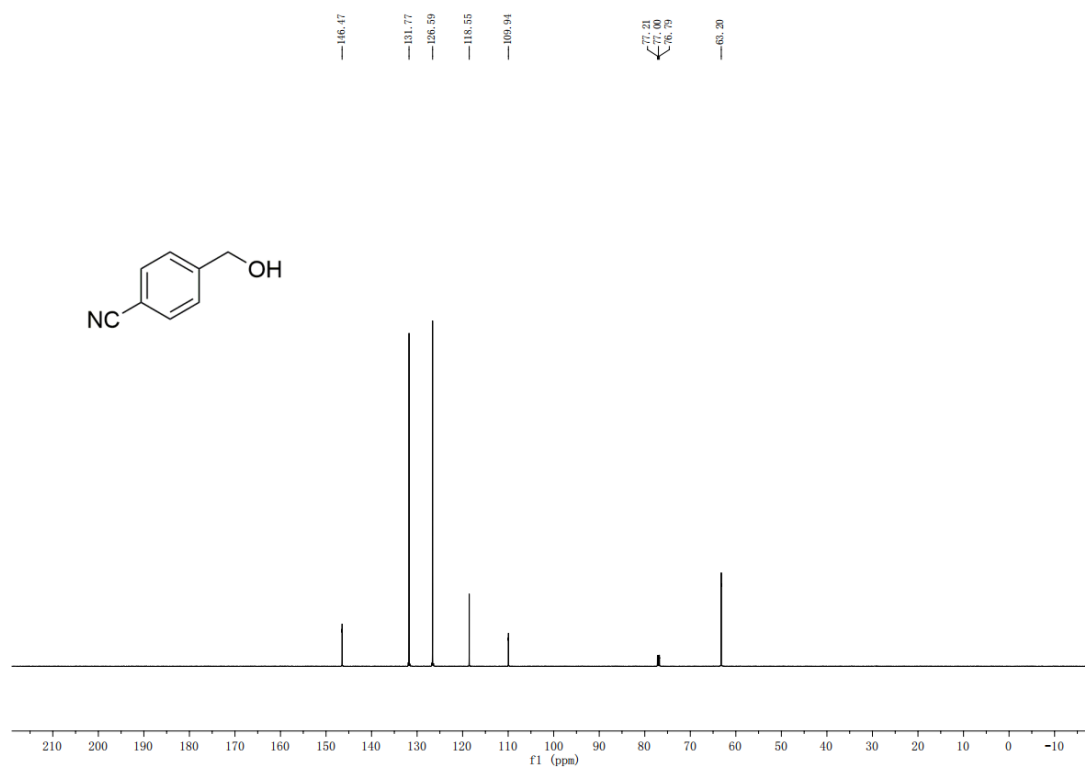

<sup>13</sup>C NMR spectrum of **11** (151MHz, CDCl<sub>3</sub>)

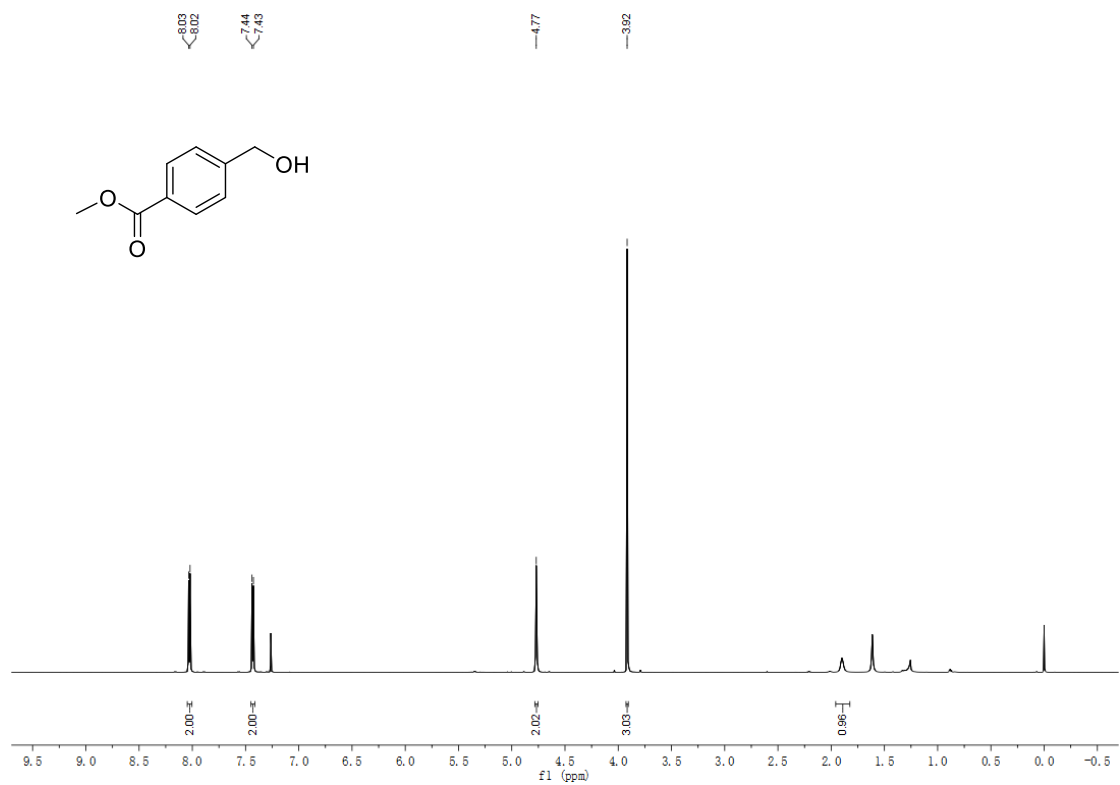

<sup>1</sup>H NMR spectrum of **12** (600MHz, CDCl<sub>3</sub>)

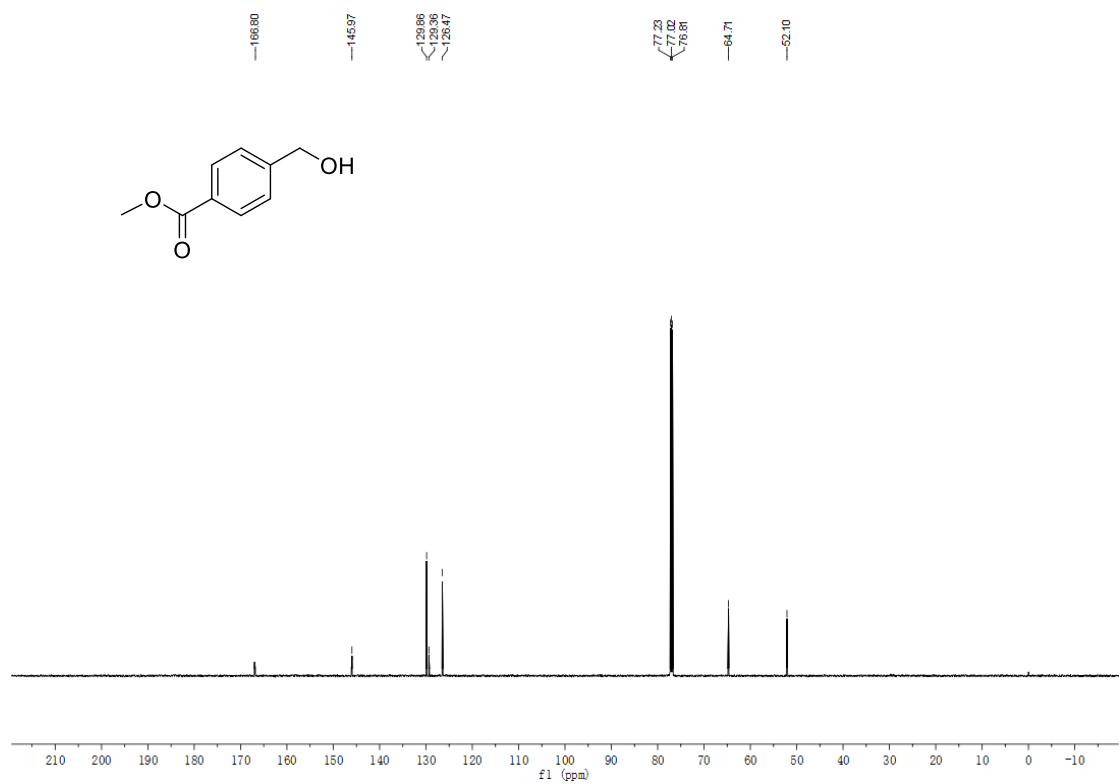

<sup>13</sup>C NMR spectrum of **12** (151MHz, CDCl<sub>3</sub>)

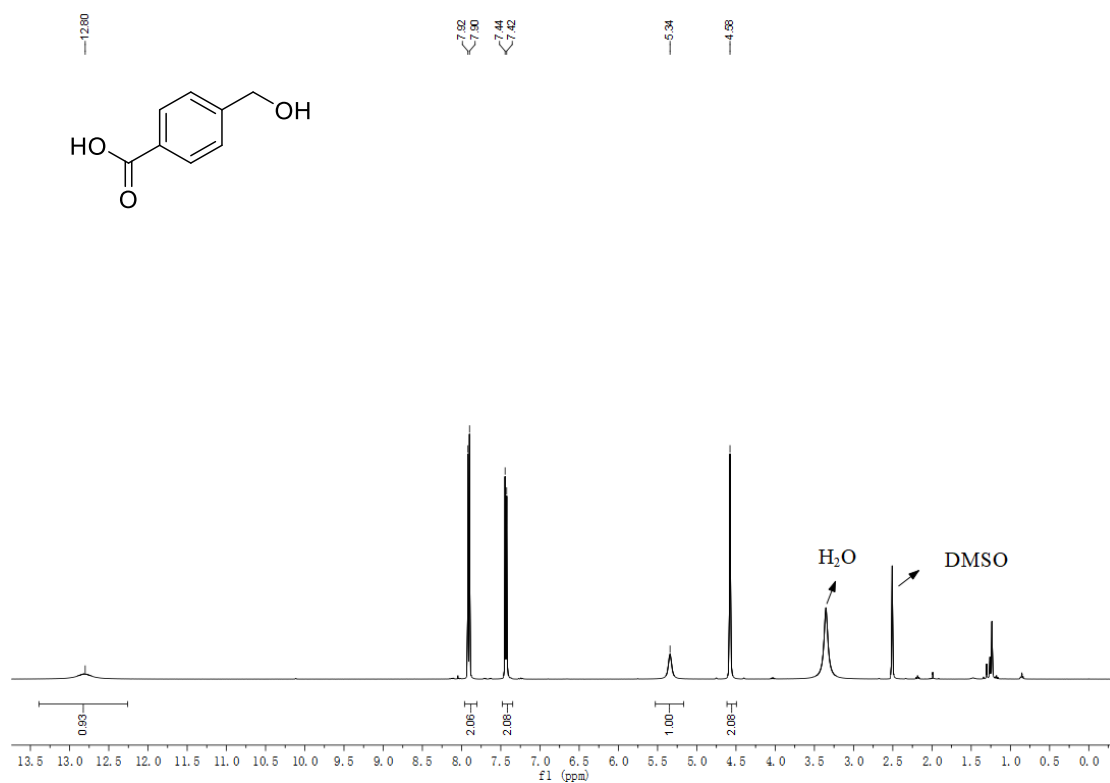

<sup>1</sup>H NMR spectrum of **13** (400MHz, DMSO)

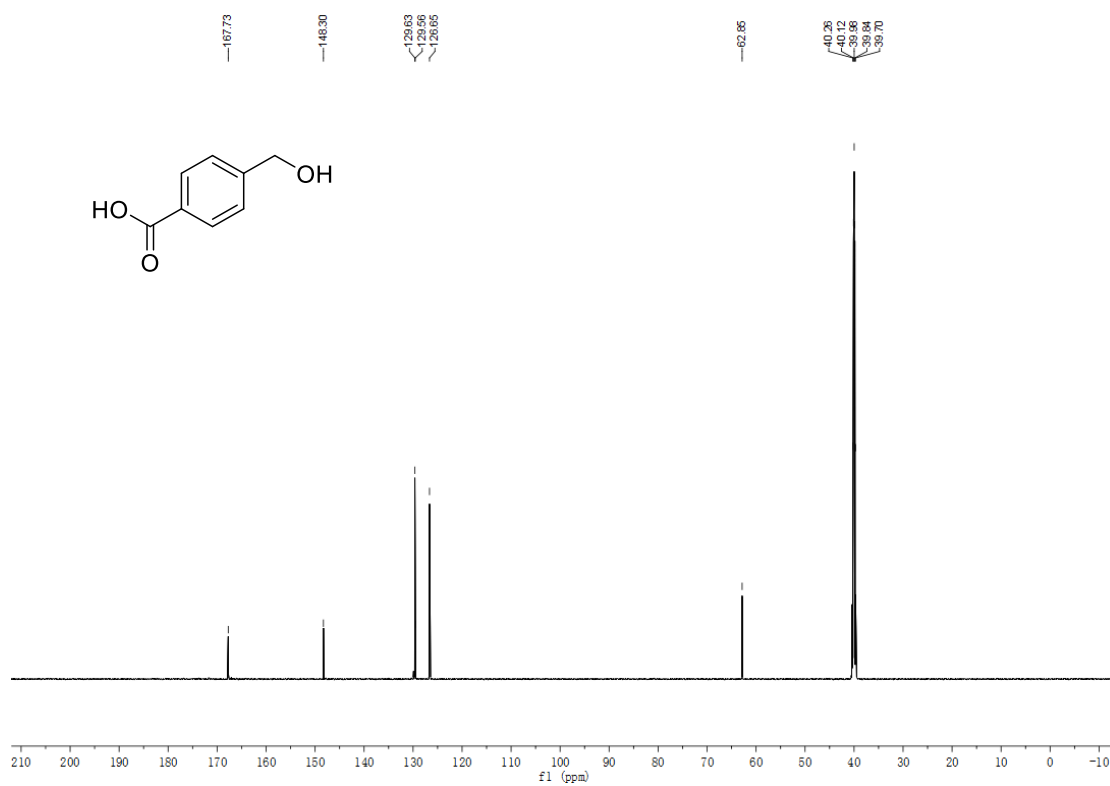

<sup>13</sup>C NMR spectrum of **13** (101MHz, DMSO)

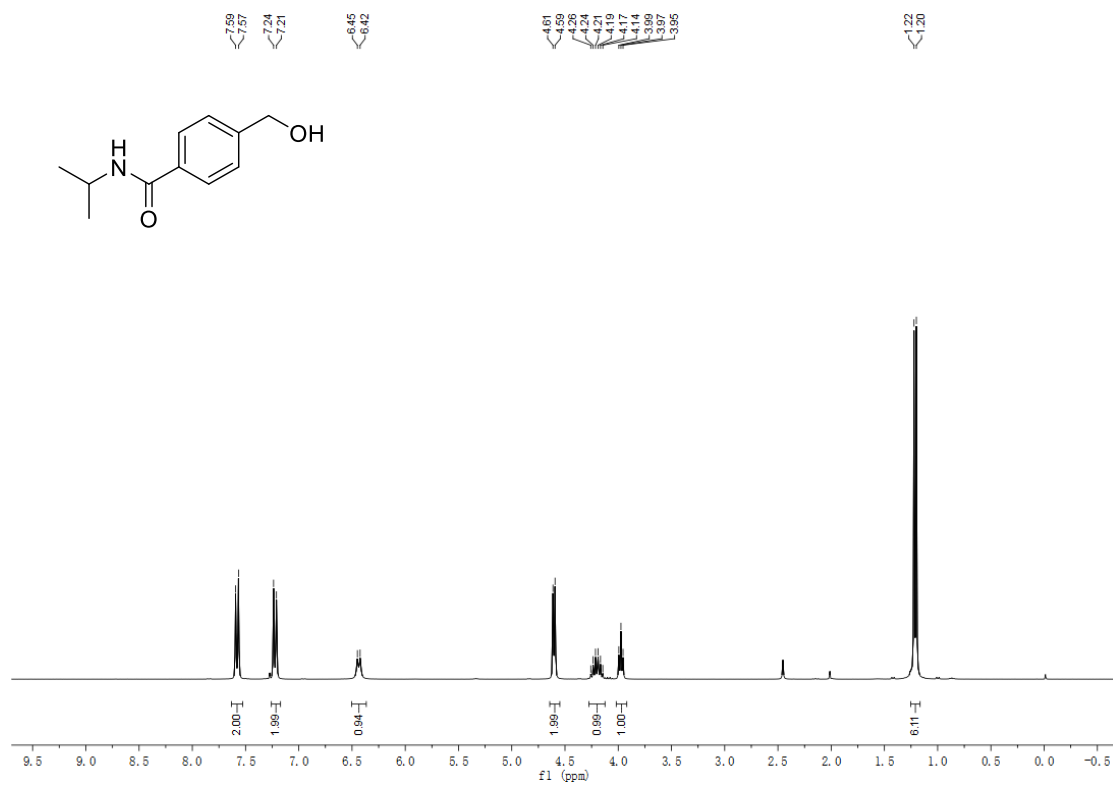

<sup>1</sup>H NMR spectrum of **14** (600MHz, CDCl<sub>3</sub>)

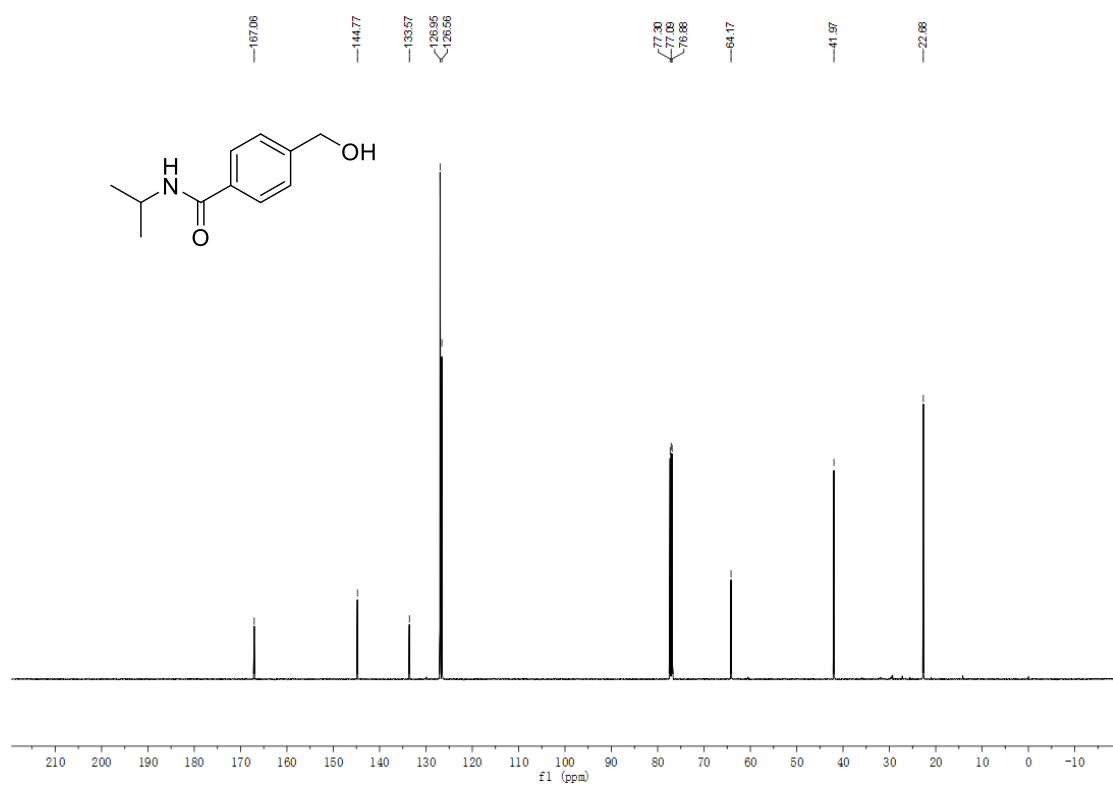

<sup>13</sup>C NMR spectrum of **14** (151MHz, CDCl<sub>3</sub>)

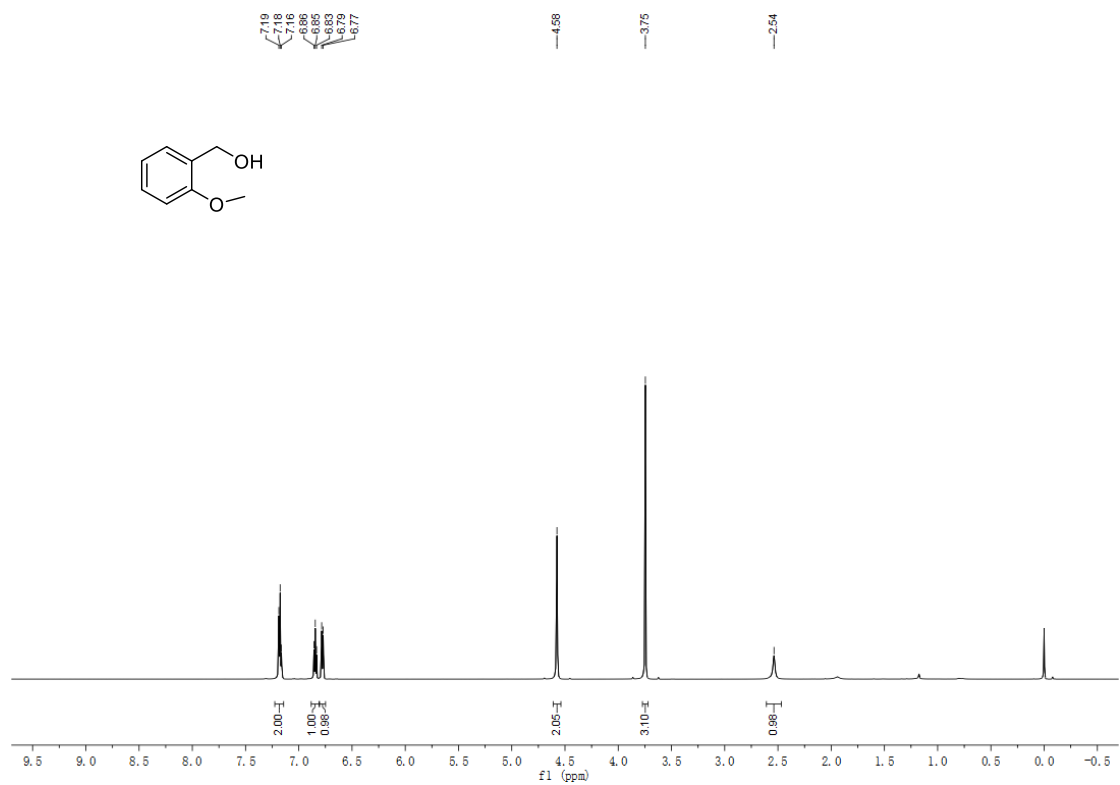

<sup>1</sup>H NMR spectrum of 15 (600MHz, CDCl<sub>3</sub>)

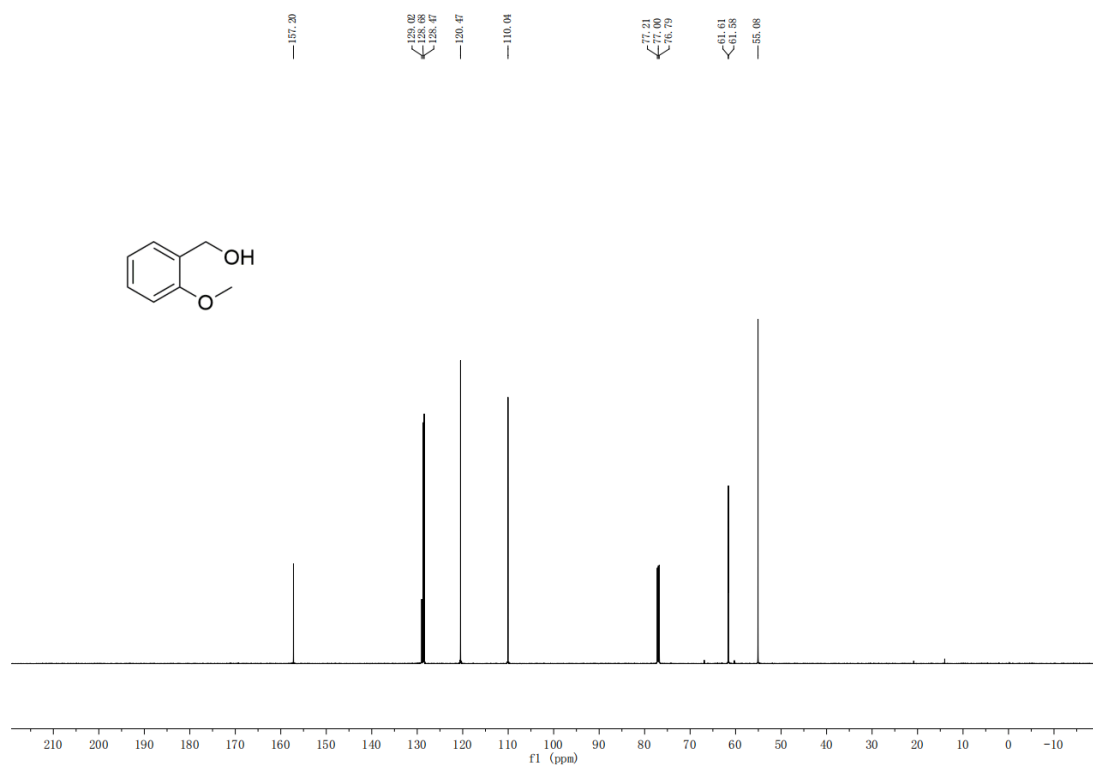

<sup>13</sup>C NMR spectrum of 15 (151MHz, CDCl<sub>3</sub>)

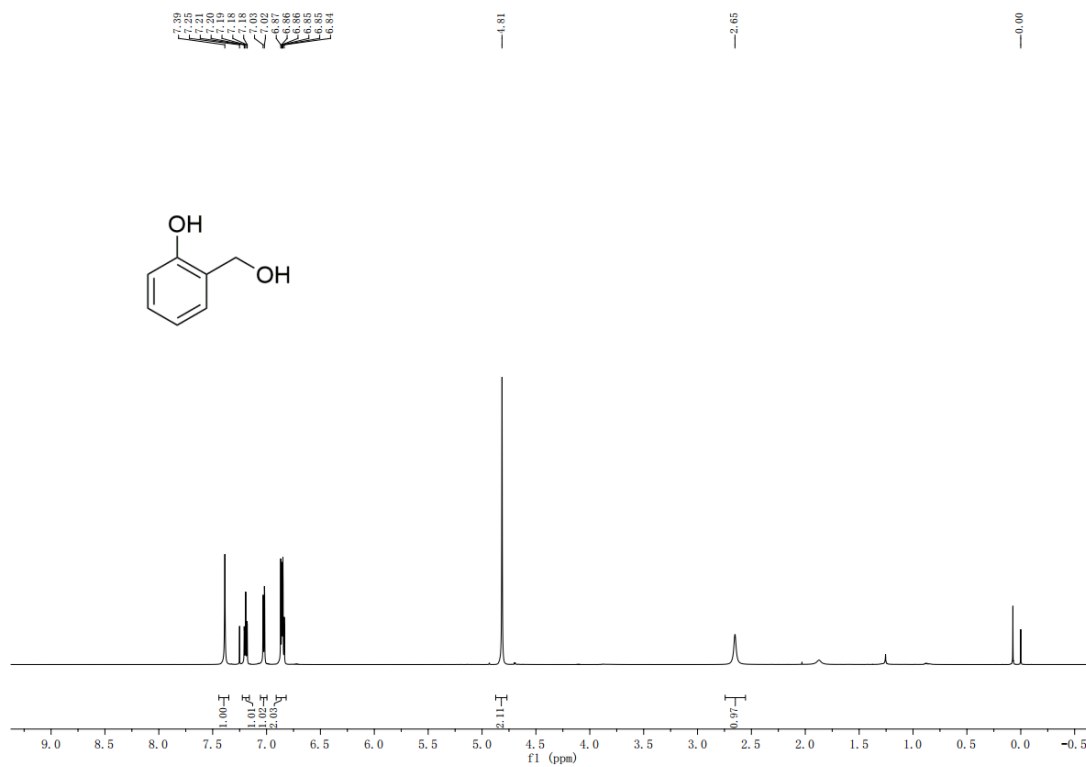

<sup>1</sup>H NMR spectrum of **16** (600MHz, CDCl<sub>3</sub>)

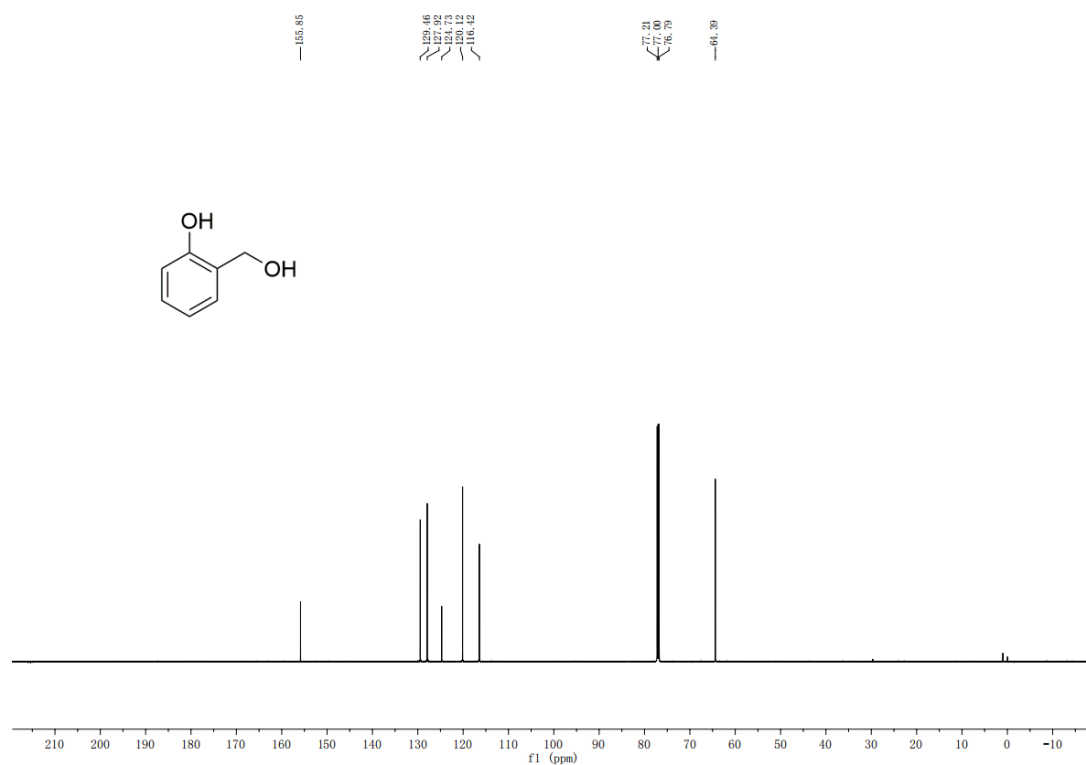

<sup>13</sup>C NMR spectrum of **16** (151MHz, CDCl<sub>3</sub>)



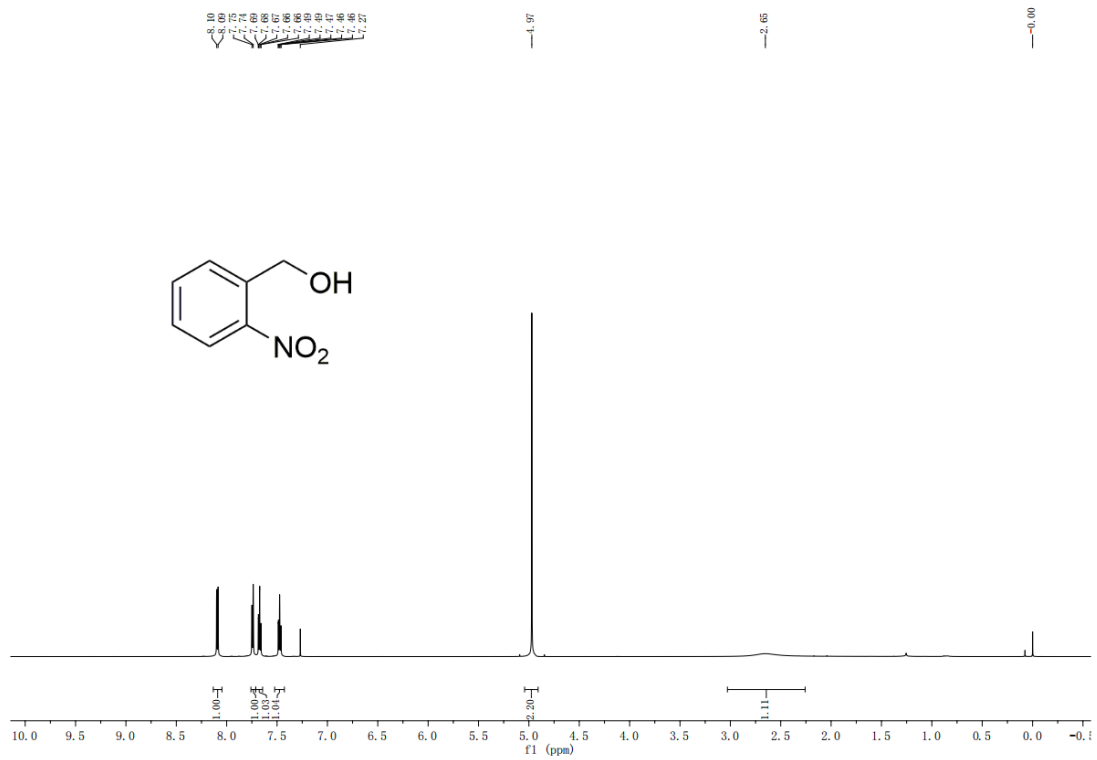

<sup>1</sup>H NMR spectrum of 17 (600MHz, CDCl<sub>3</sub>)

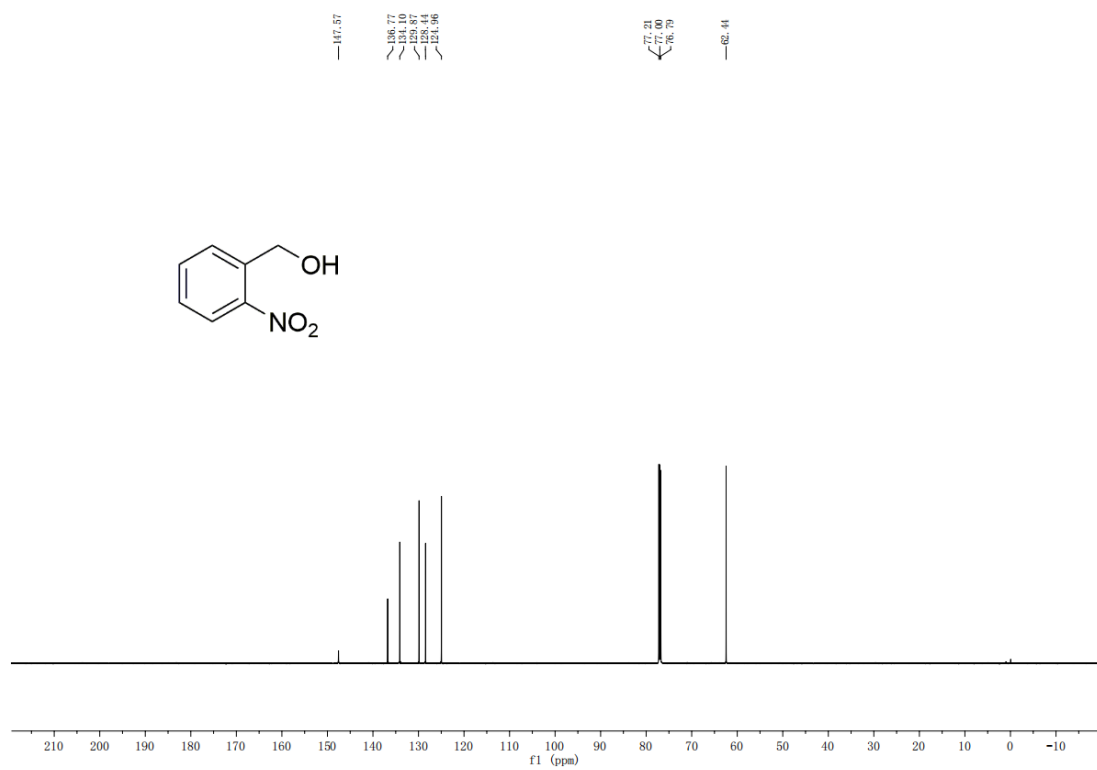

<sup>13</sup>C NMR spectrum of 17 (151MHz, CDCl<sub>3</sub>)

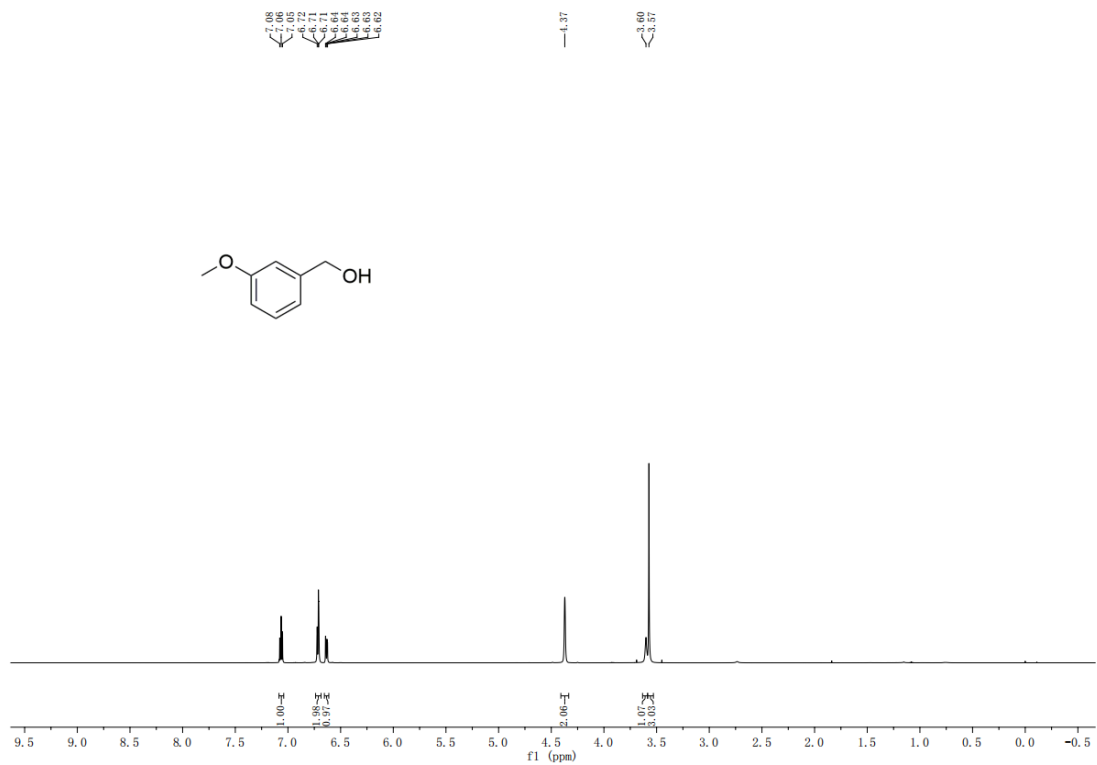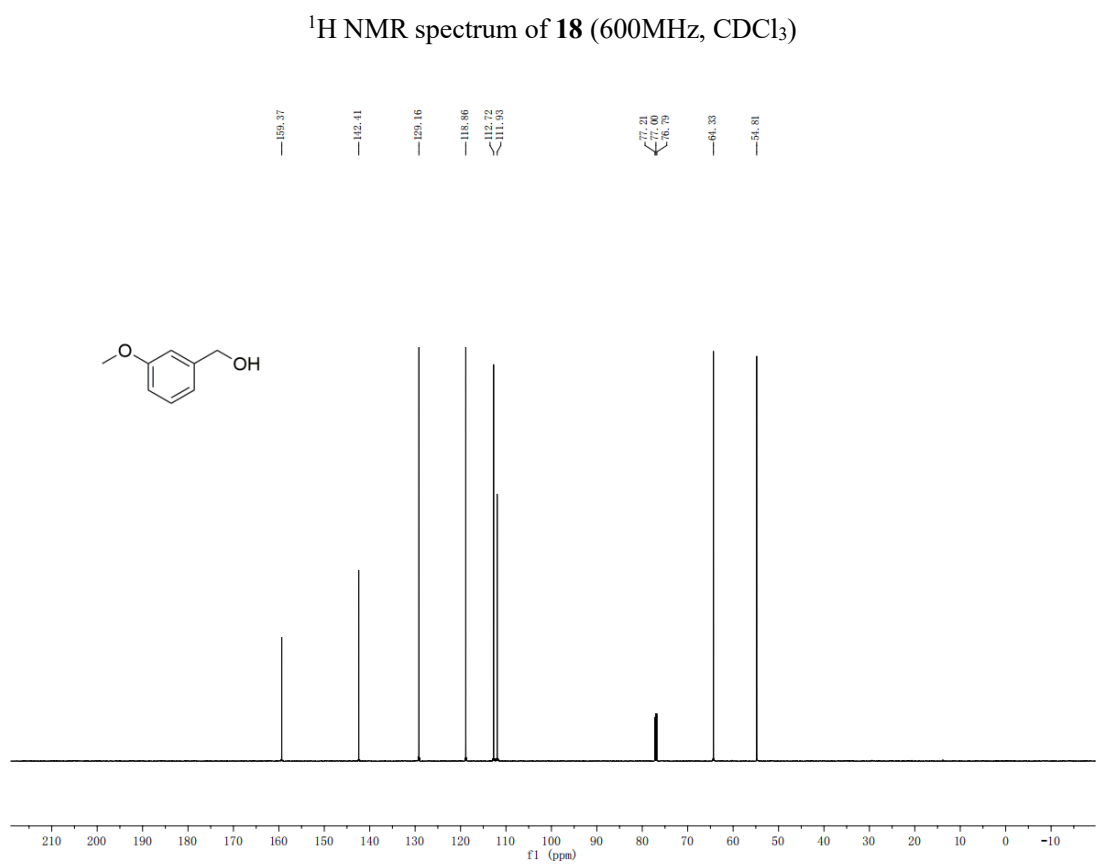

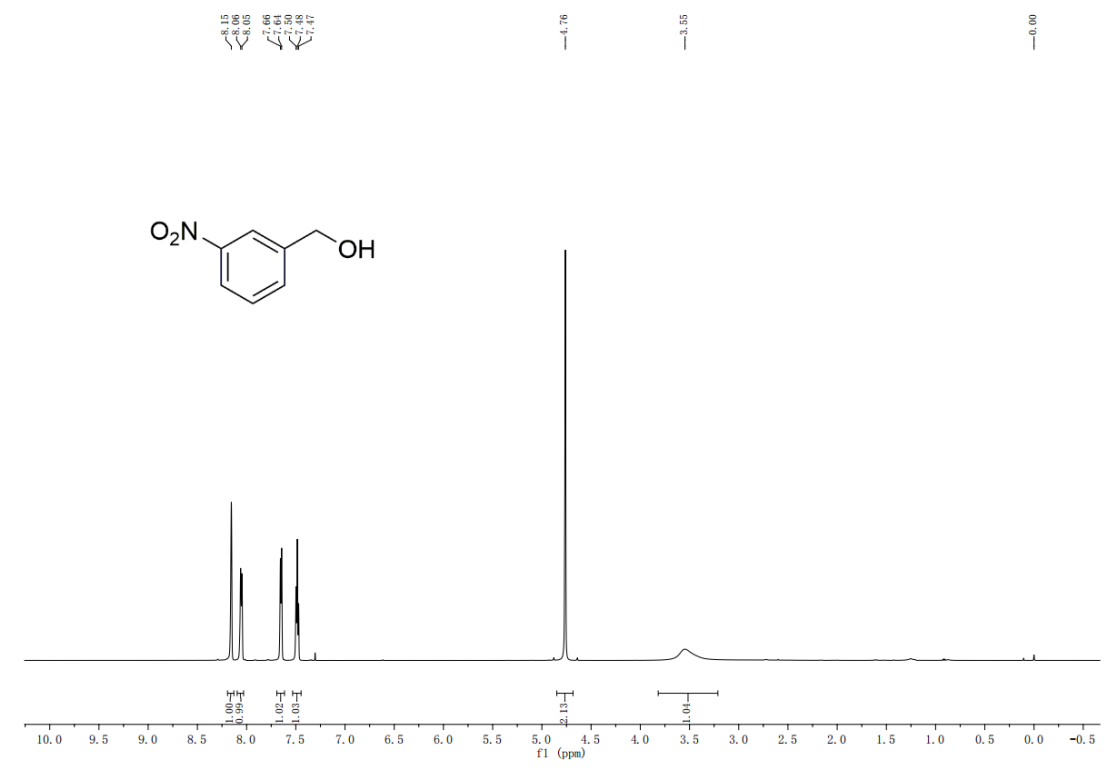

$^1\text{H}$  NMR spectrum of **19** (600MHz,  $\text{CDCl}_3$ )

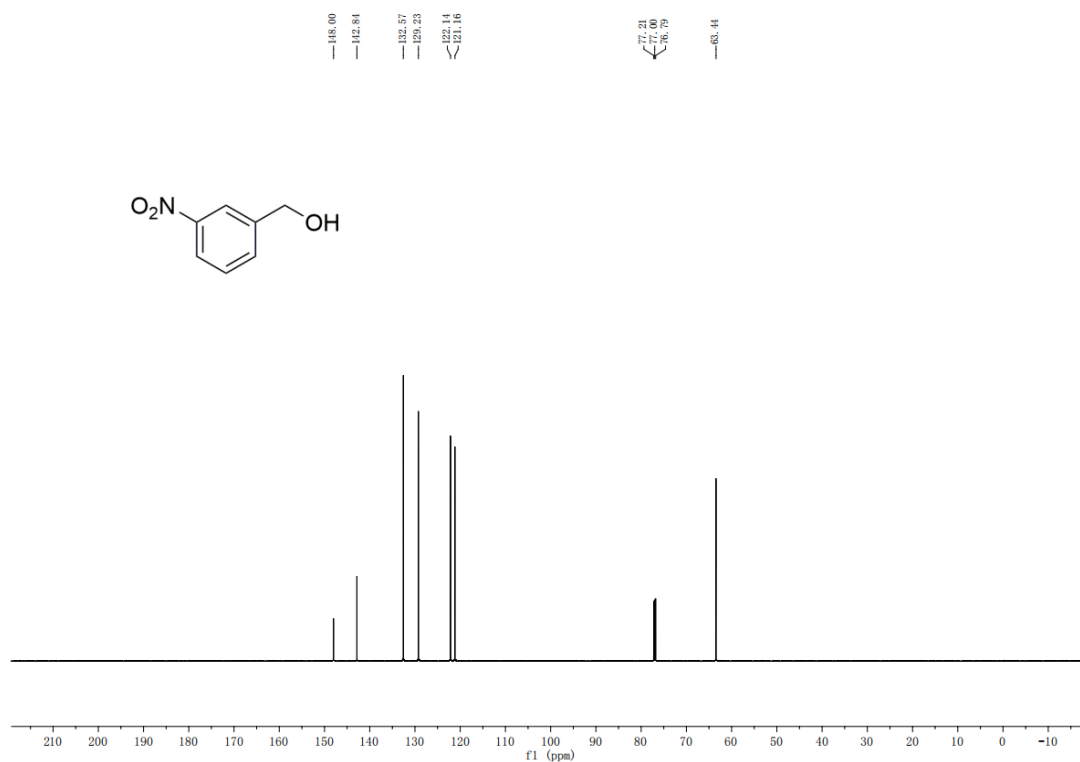

$^{13}\text{C}$  NMR spectrum of **19** (151MHz,  $\text{CDCl}_3$ )

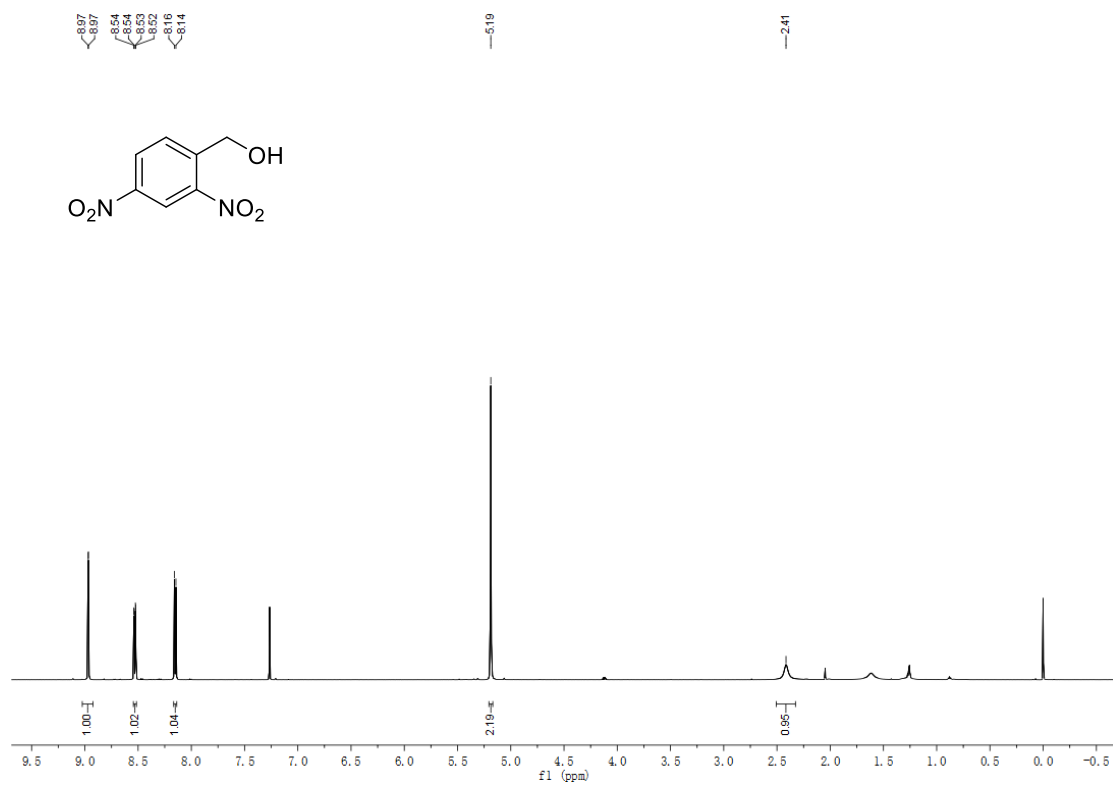

<sup>1</sup>H NMR spectrum of **20** (600MHz, CDCl<sub>3</sub>)

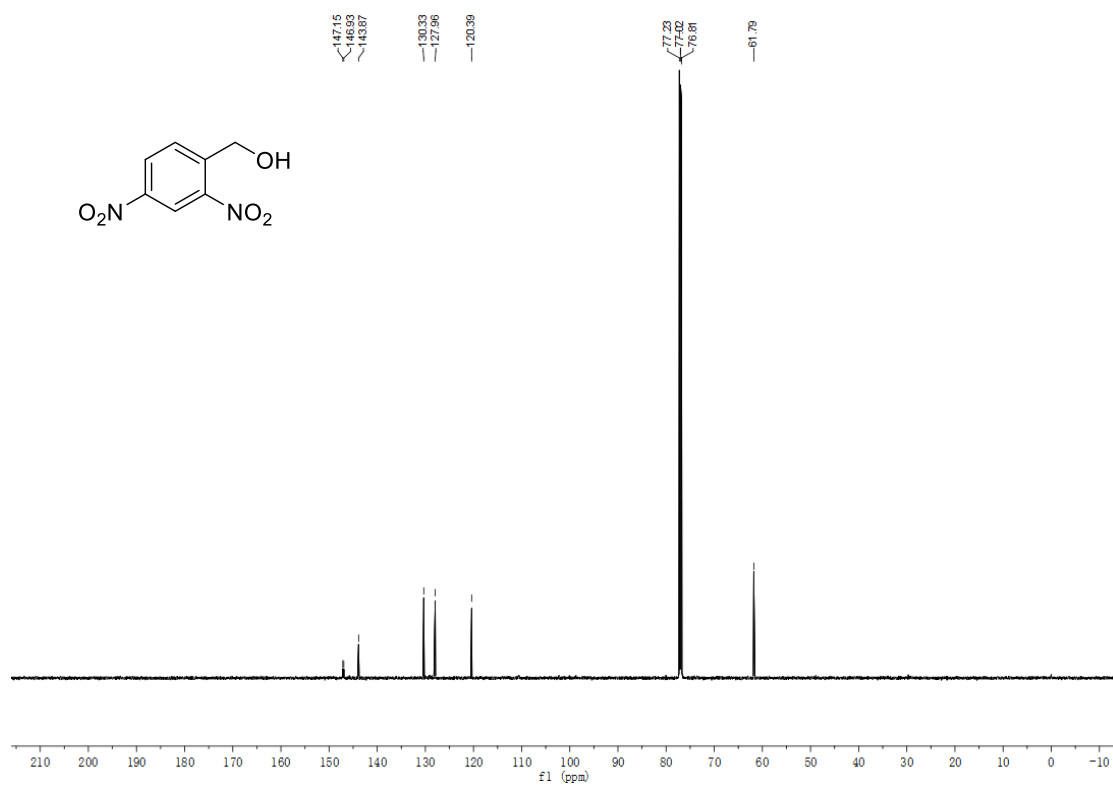

<sup>13</sup>C NMR spectrum of **20** (151MHz, CDCl<sub>3</sub>)

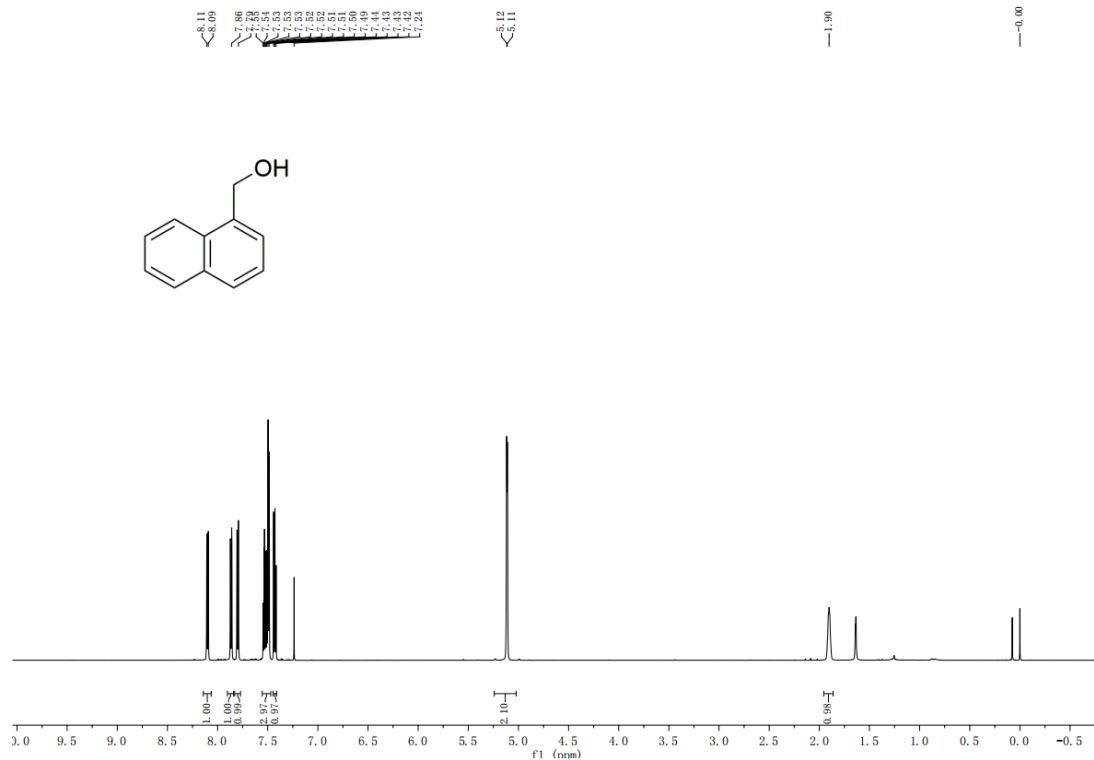

<sup>1</sup>H NMR spectrum of **21** (600MHz, CDCl<sub>3</sub>)

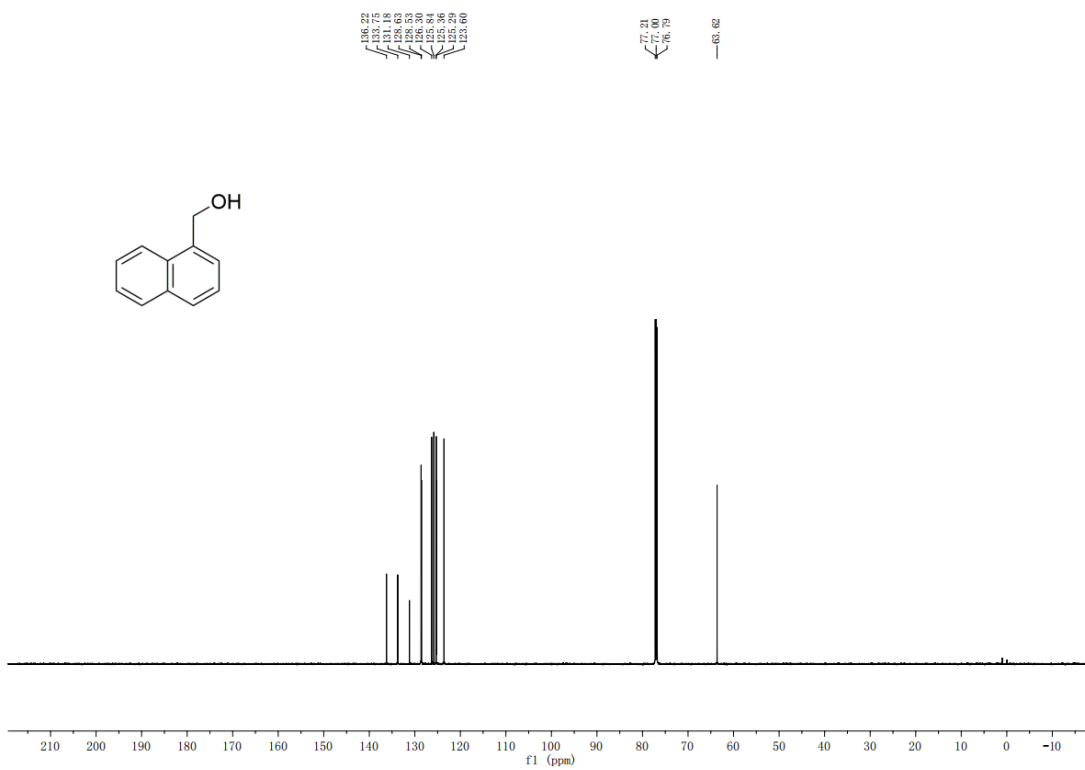

<sup>13</sup>C NMR spectrum of **21** (151MHz, CDCl<sub>3</sub>)

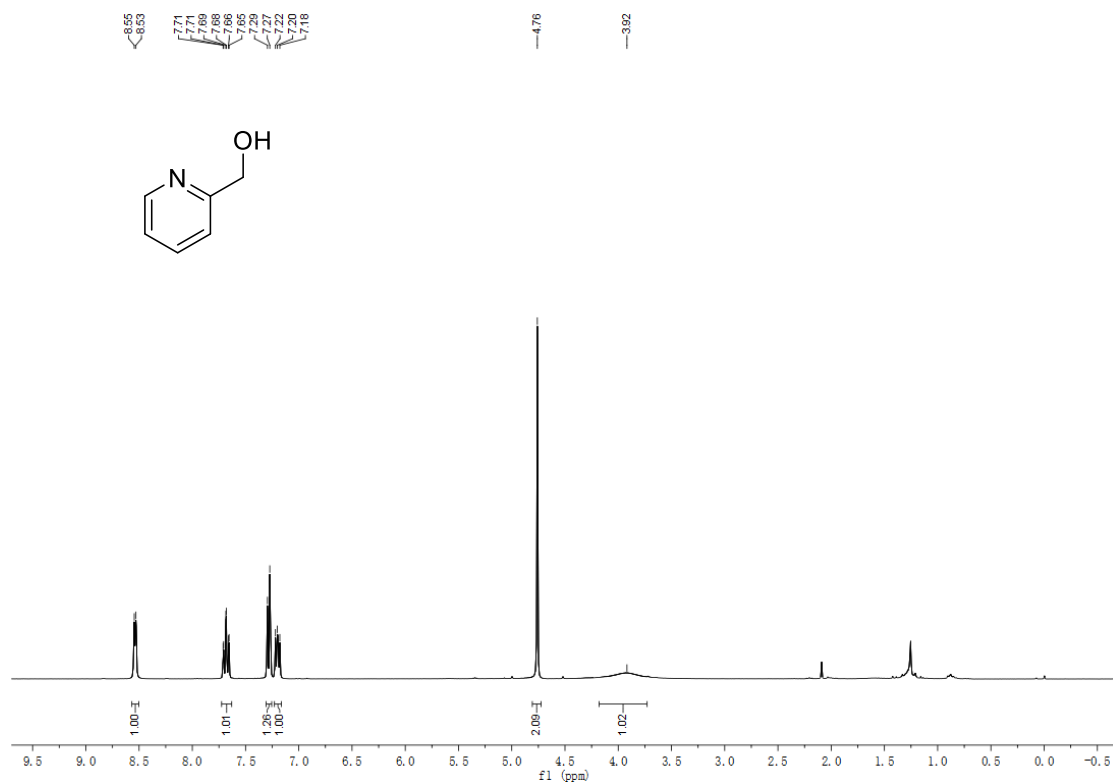

<sup>1</sup>H NMR spectrum of **22** (600MHz, CDCl<sub>3</sub>)

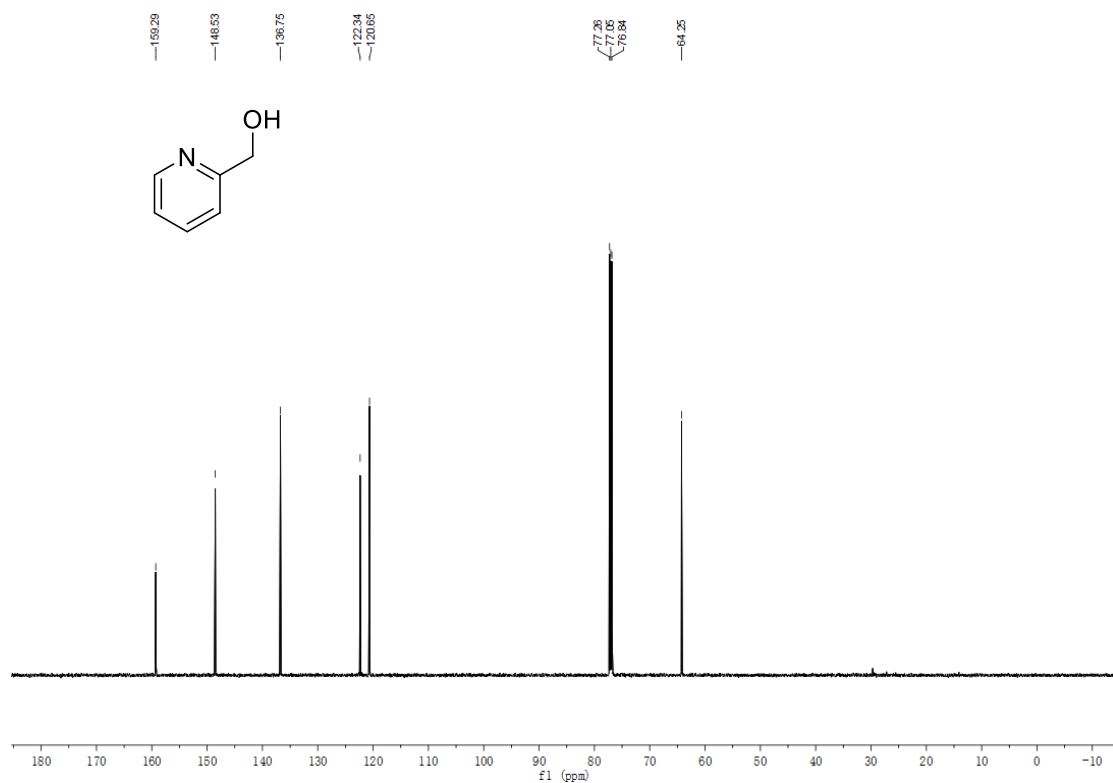

<sup>13</sup>C NMR spectrum of **22** (151MHz, CDCl<sub>3</sub>)

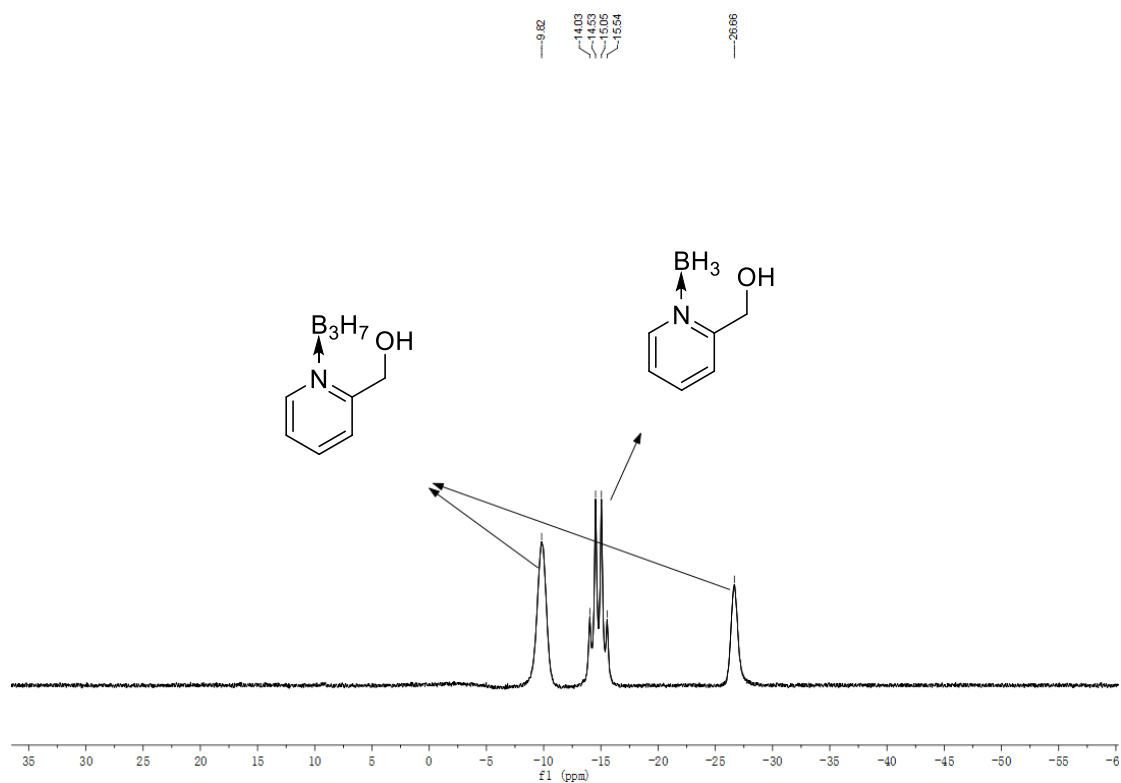

$^{11}\text{B}$  NMR spectrum of pyridin-2-ylmethanol borane complexes (600MHz,  $\text{CDCl}_3$ )

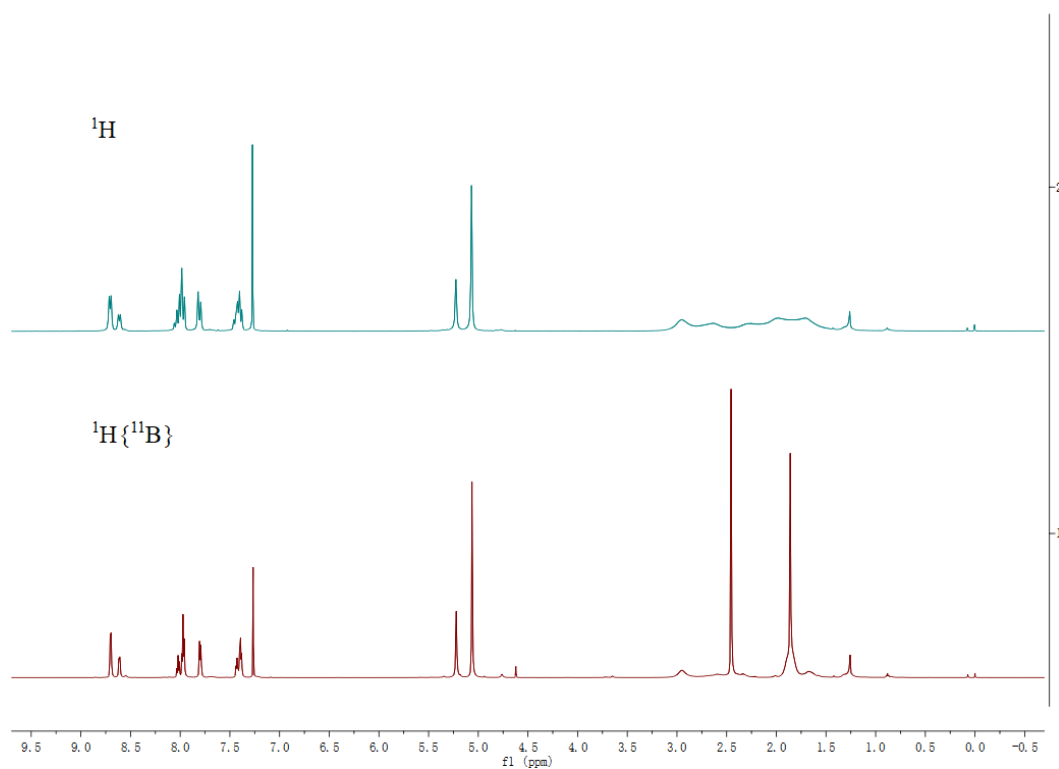

$^1\text{H}$  NMR and  $^1\text{H}\{^{11}\text{B}\}$  NMR spectrum of pyridin-2-ylmethanol borane complexes (600MHz,  $\text{CDCl}_3$ )

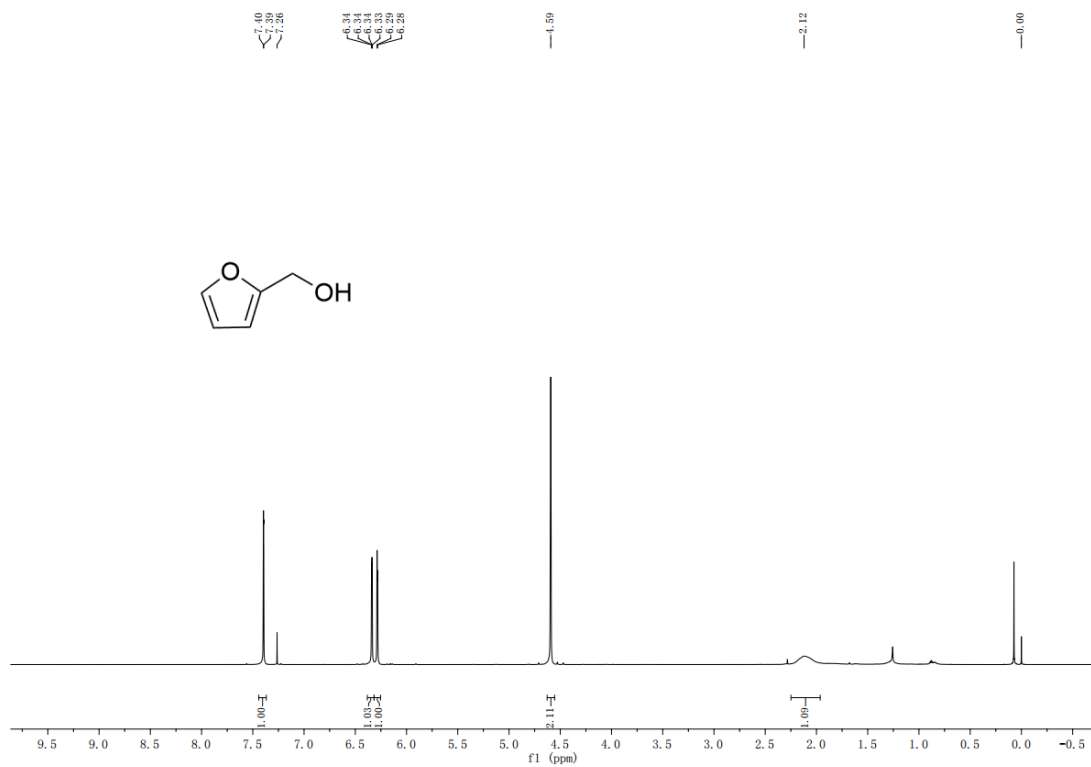

$^1\text{H}$  NMR spectrum of **23** (600MHz,  $\text{CDCl}_3$ )

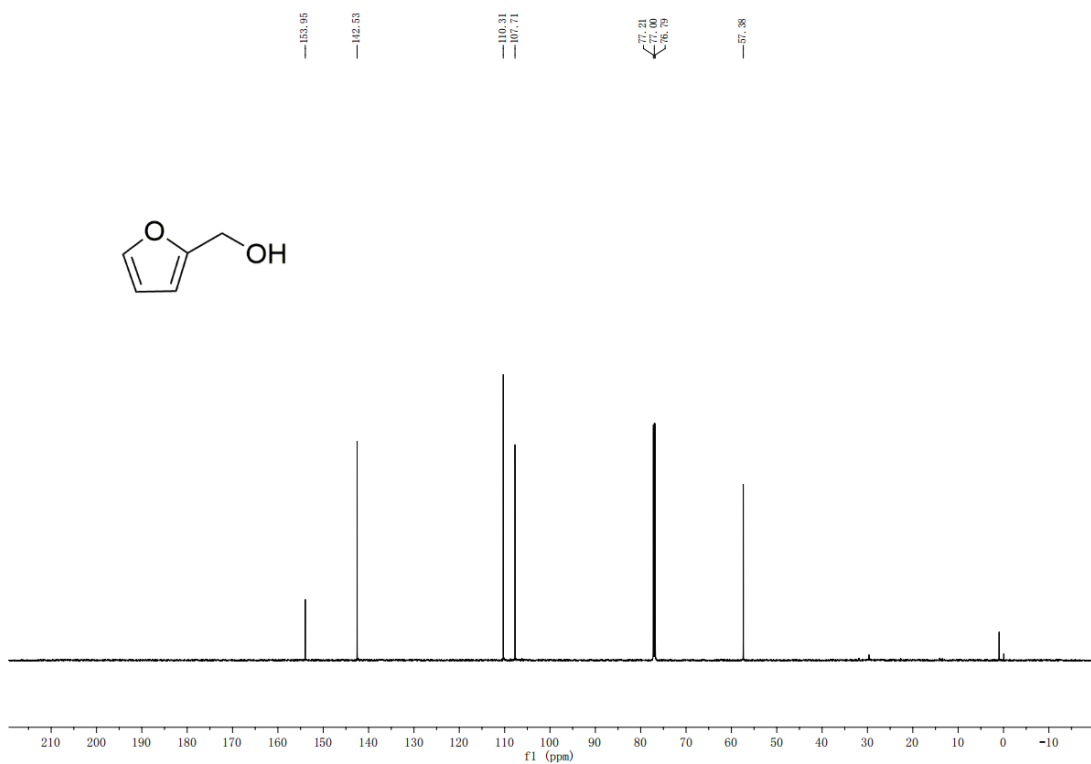

$^{13}\text{C}$  NMR spectrum of **23** (151MHz,  $\text{CDCl}_3$ )



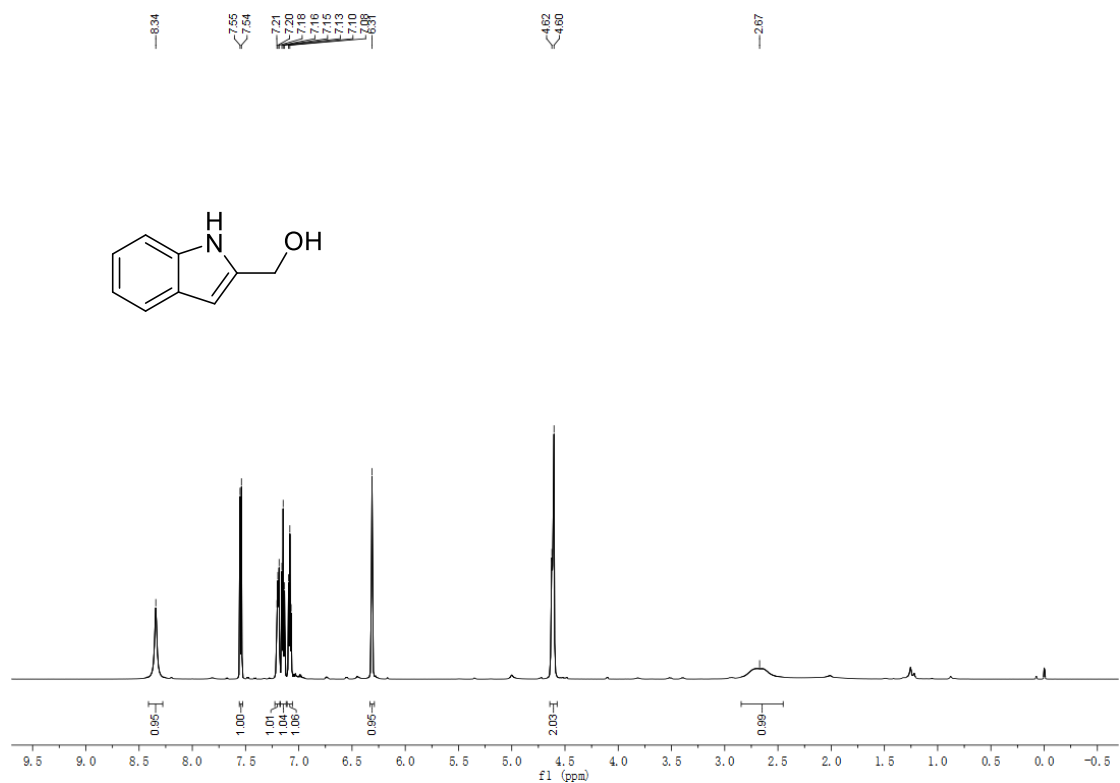

<sup>1</sup>H NMR spectrum of **24** (600MHz, CDCl<sub>3</sub>)

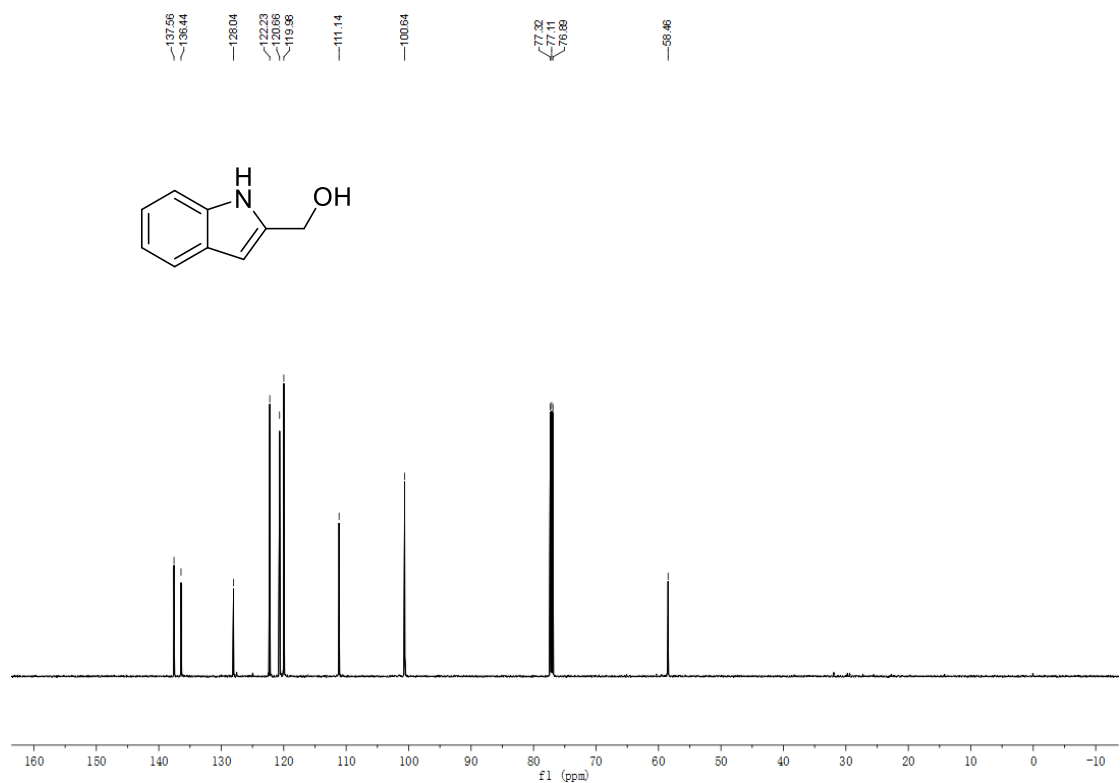

<sup>13</sup>C NMR spectrum of **24** (151MHz, CDCl<sub>3</sub>)

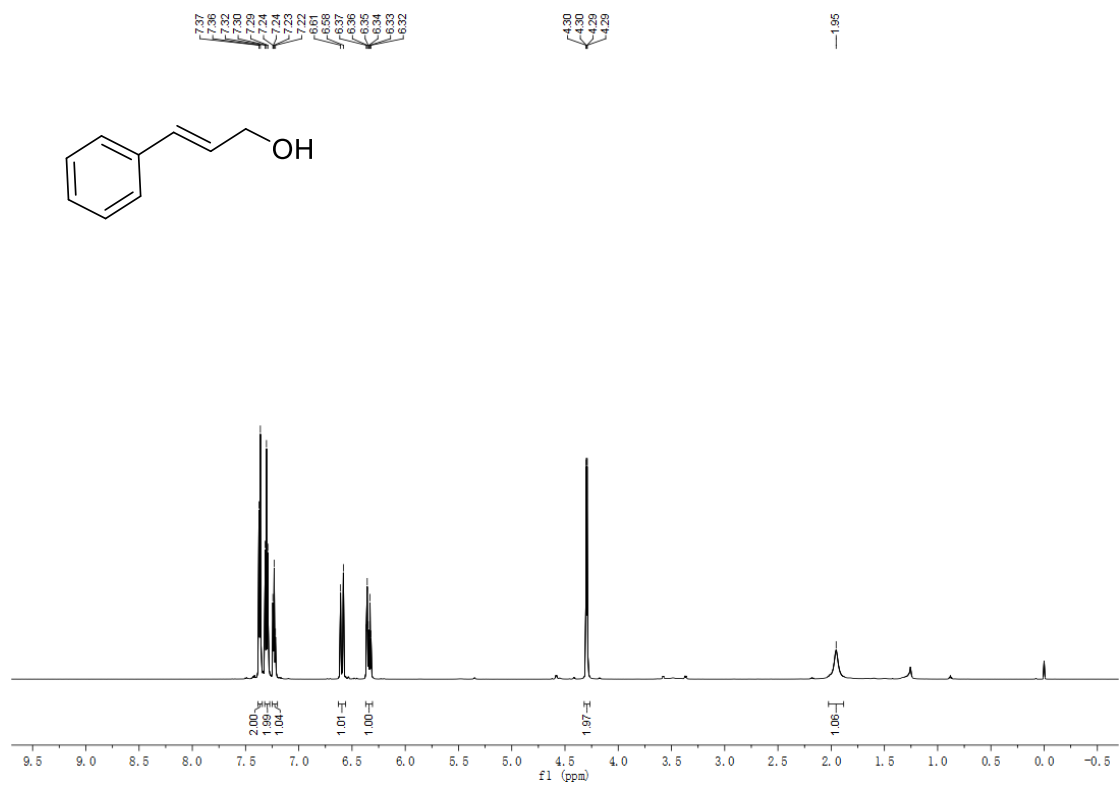

$^1\text{H}$  NMR spectrum of **25** (600MHz,  $\text{CDCl}_3$ )

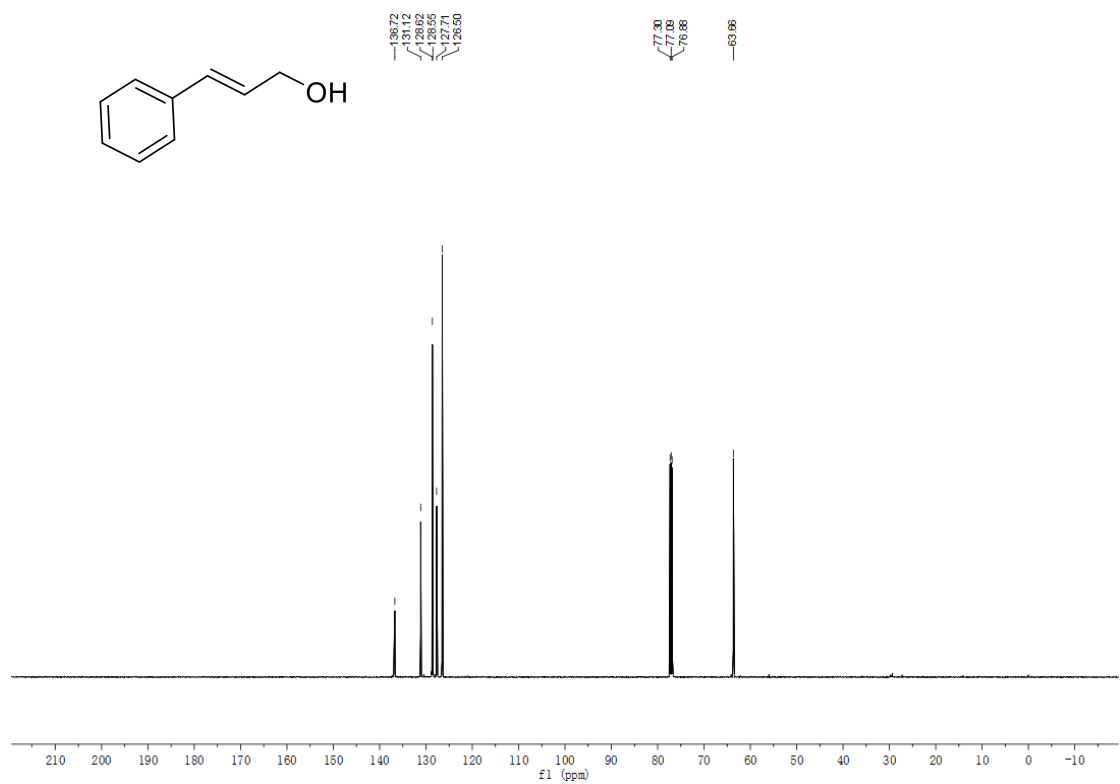

$^{13}\text{C}$  NMR spectrum of **25** (151MHz,  $\text{CDCl}_3$ )

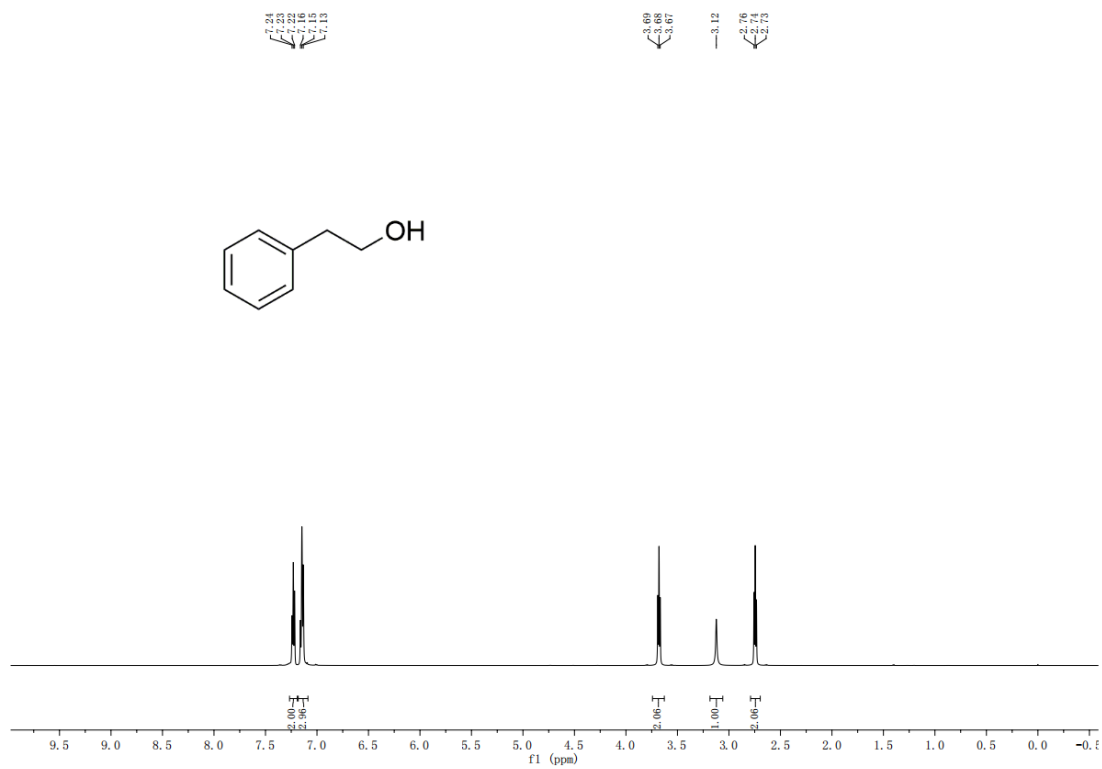

<sup>1</sup>H NMR spectrum of **26** (600MHz, CDCl<sub>3</sub>)

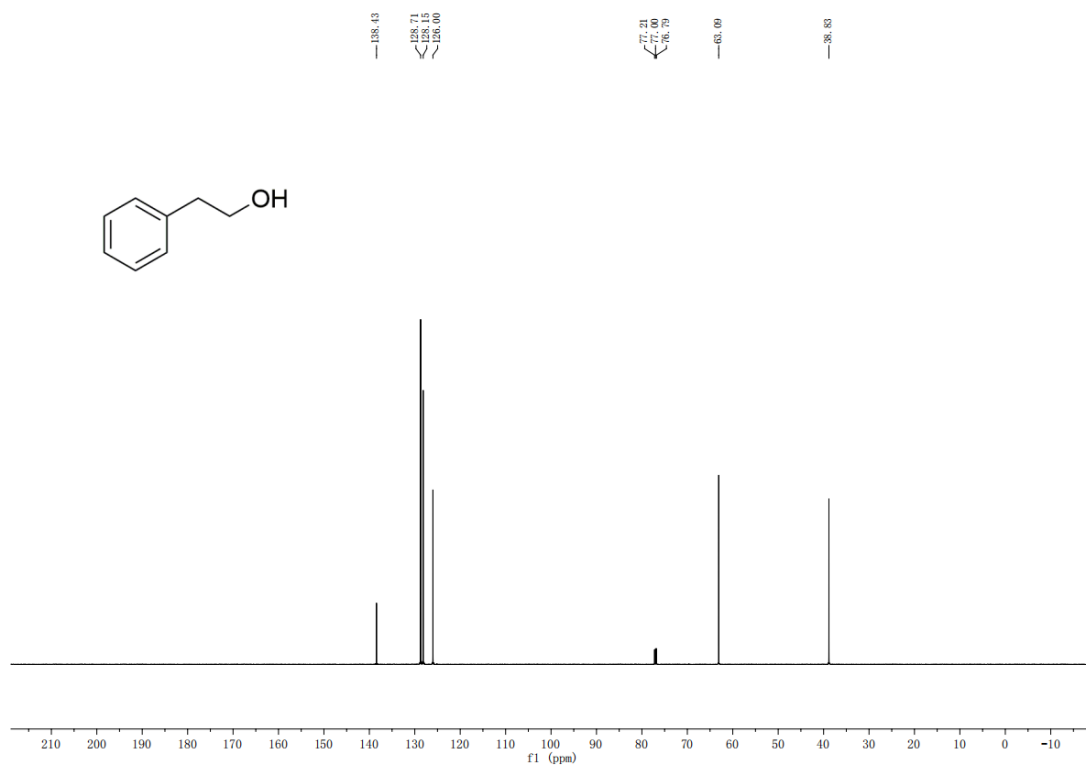

<sup>13</sup>C NMR spectrum of **26** (151MHz, CDCl<sub>3</sub>)

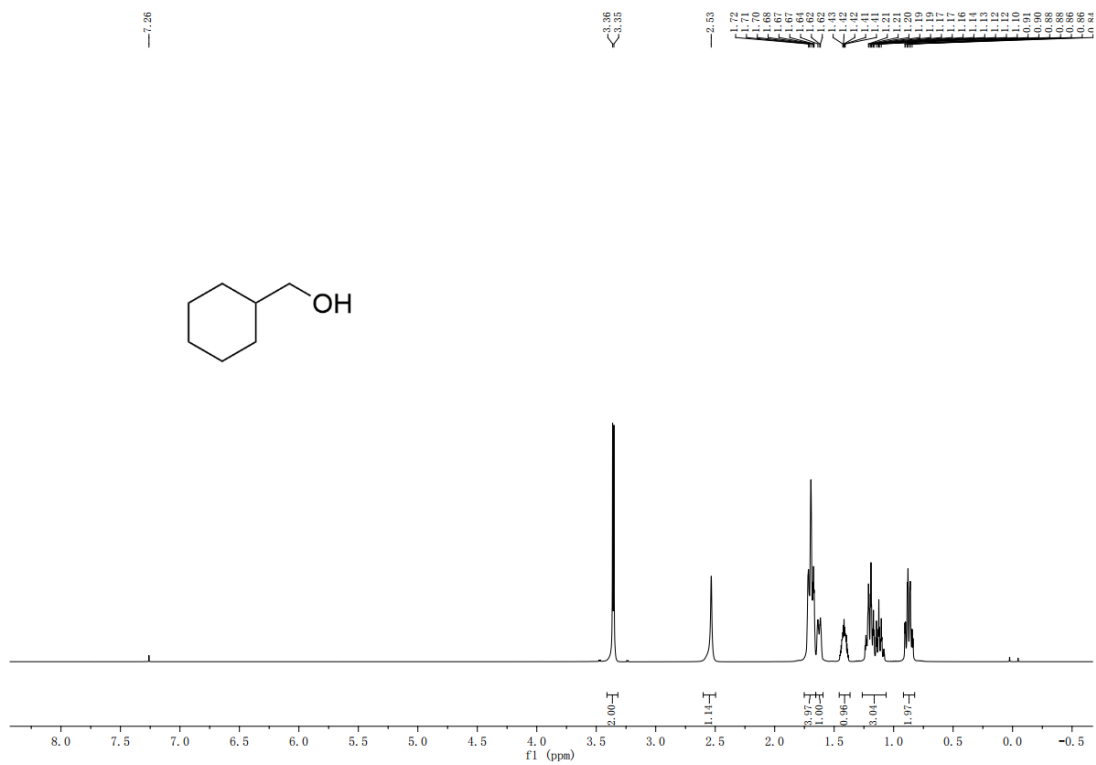

<sup>1</sup>H NMR spectrum of **27** (600MHz, CD<sub>3</sub>Cl)

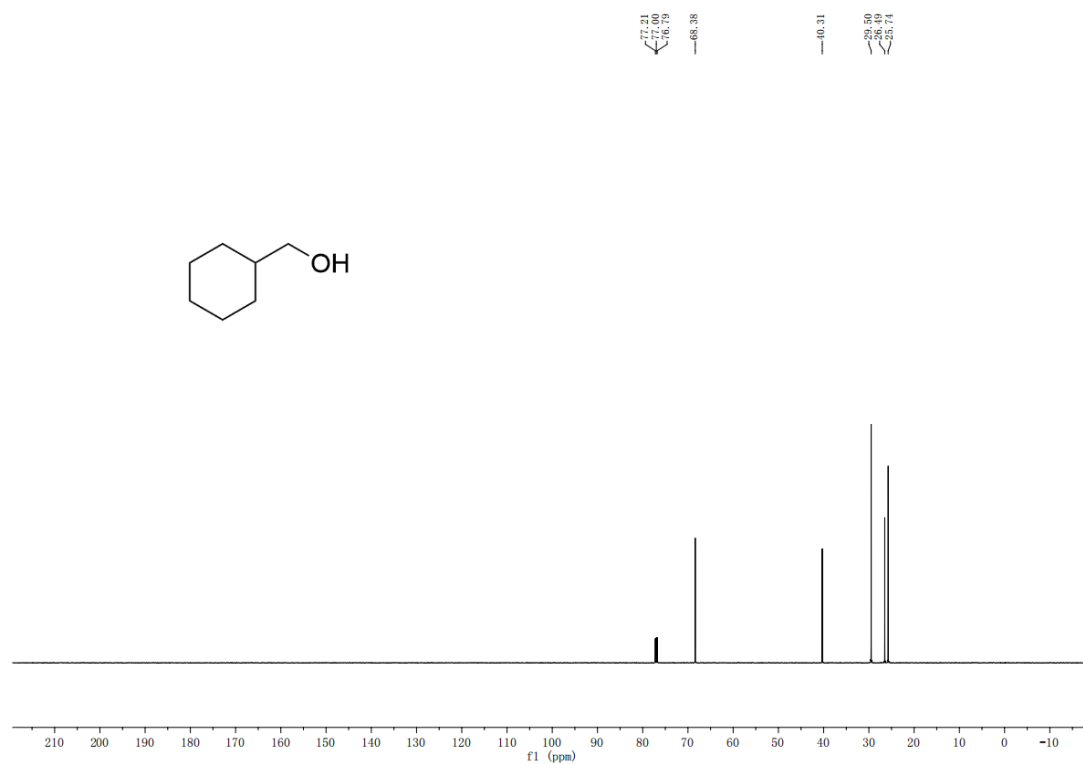

<sup>13</sup>C NMR spectrum of **27** (151MHz, CDCl<sub>3</sub>)

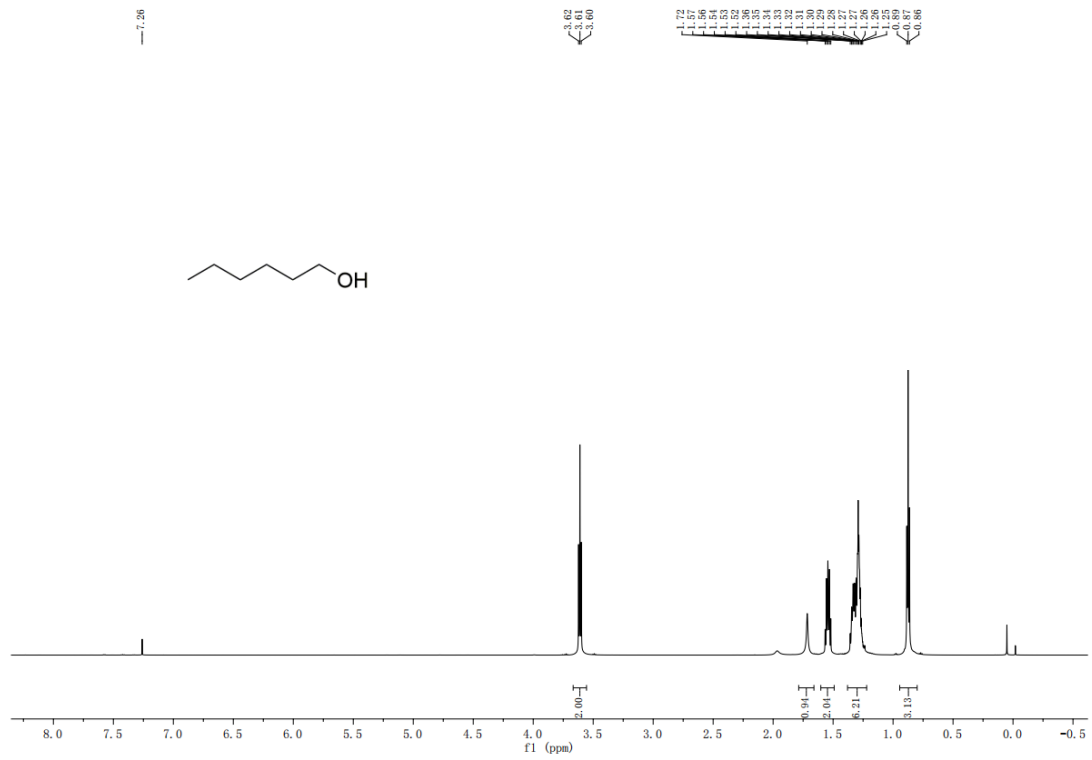

$^1\text{H}$  NMR spectrum of **28** (600MHz,  $\text{CD}_3\text{Cl}$ )

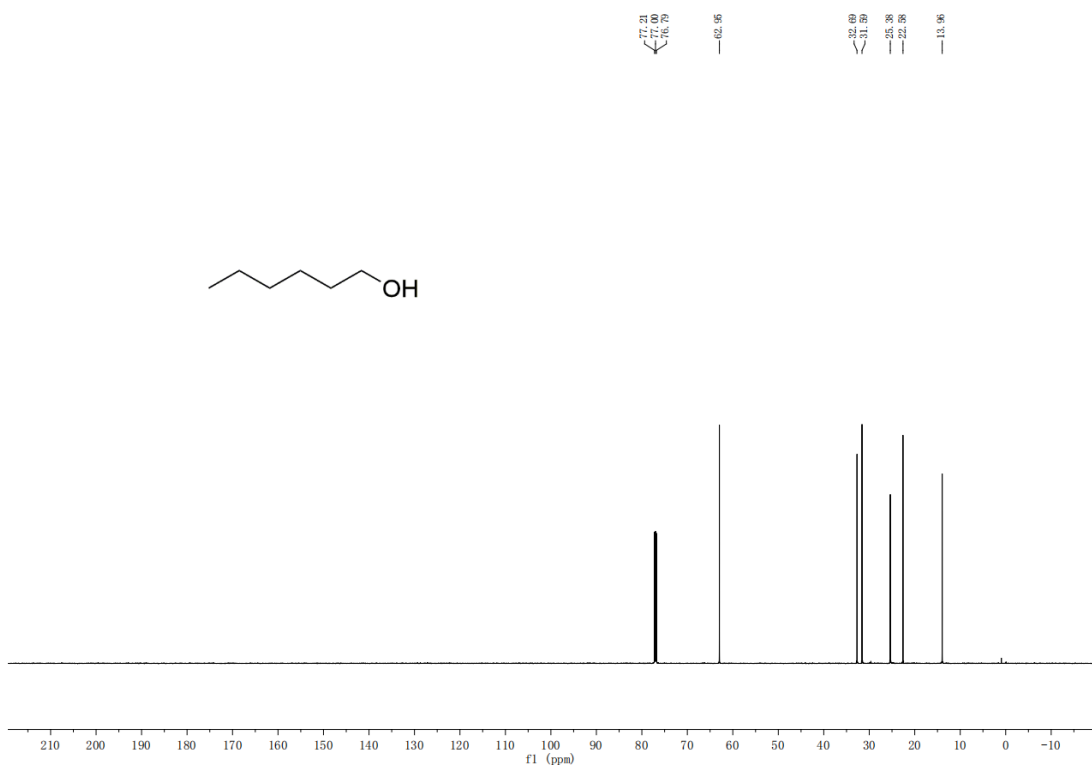

$^{13}\text{C}$  NMR spectrum of **28** (151MHz,  $\text{CDCl}_3$ )

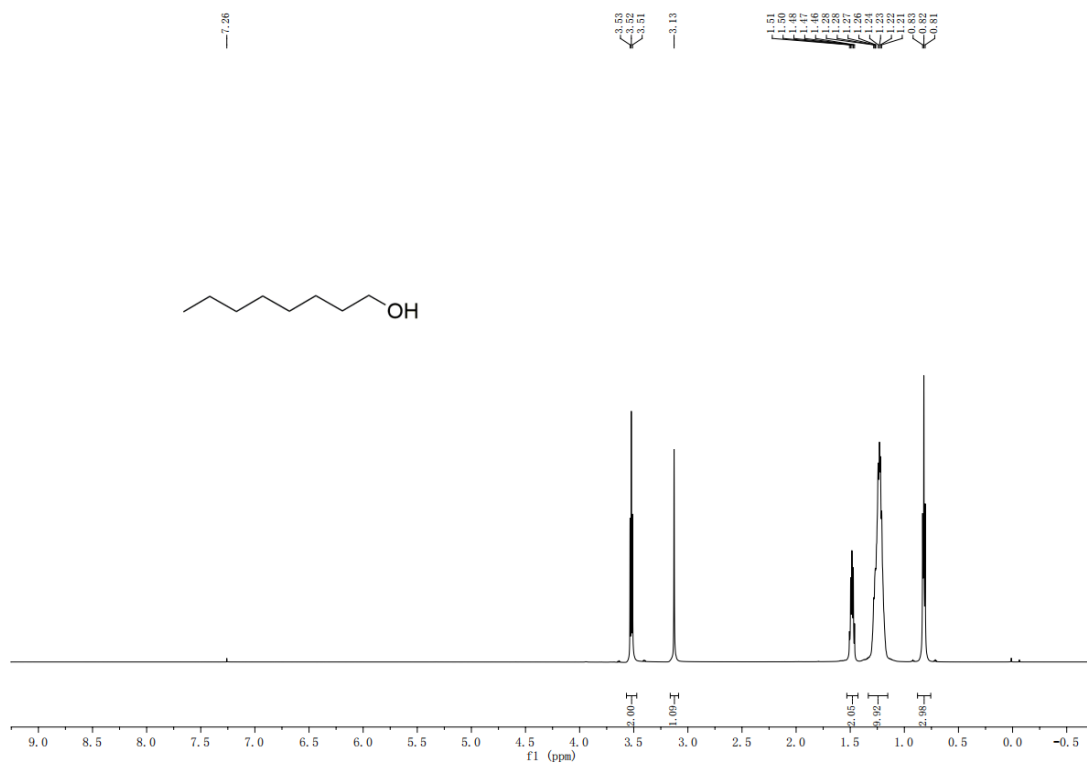

<sup>1</sup>H NMR spectrum of **29** (600MHz, CDCl<sub>3</sub>)

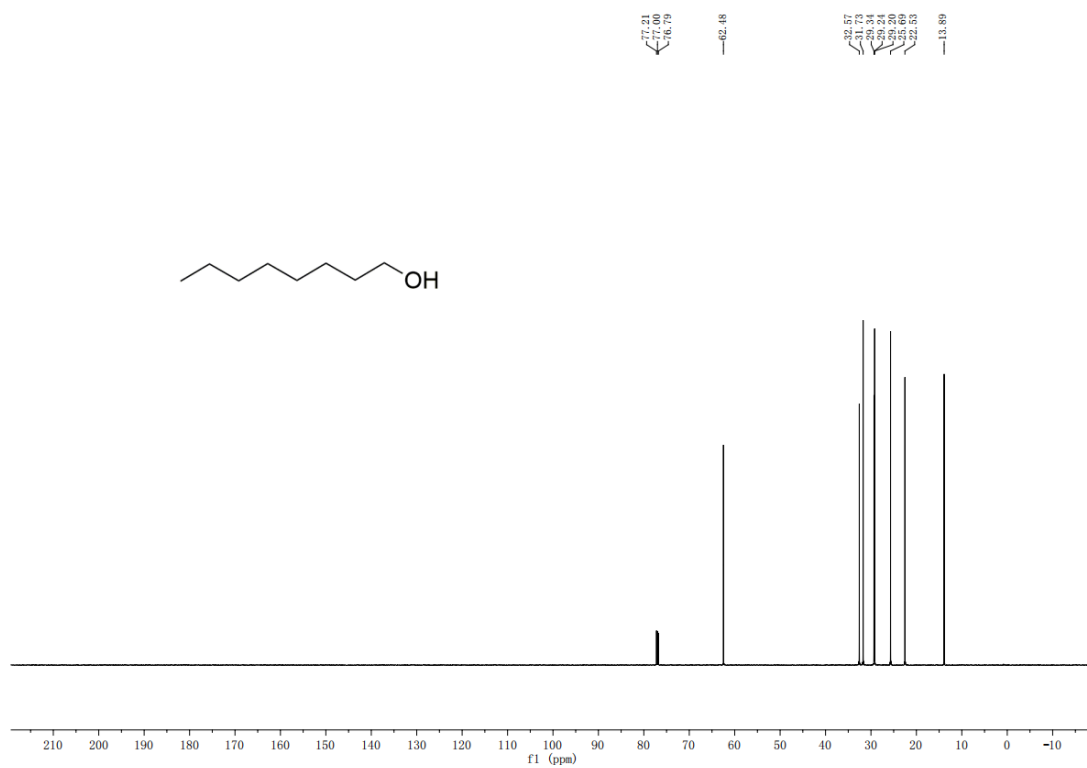

<sup>13</sup>C NMR spectrum of **29** (151MHz, CDCl<sub>3</sub>)

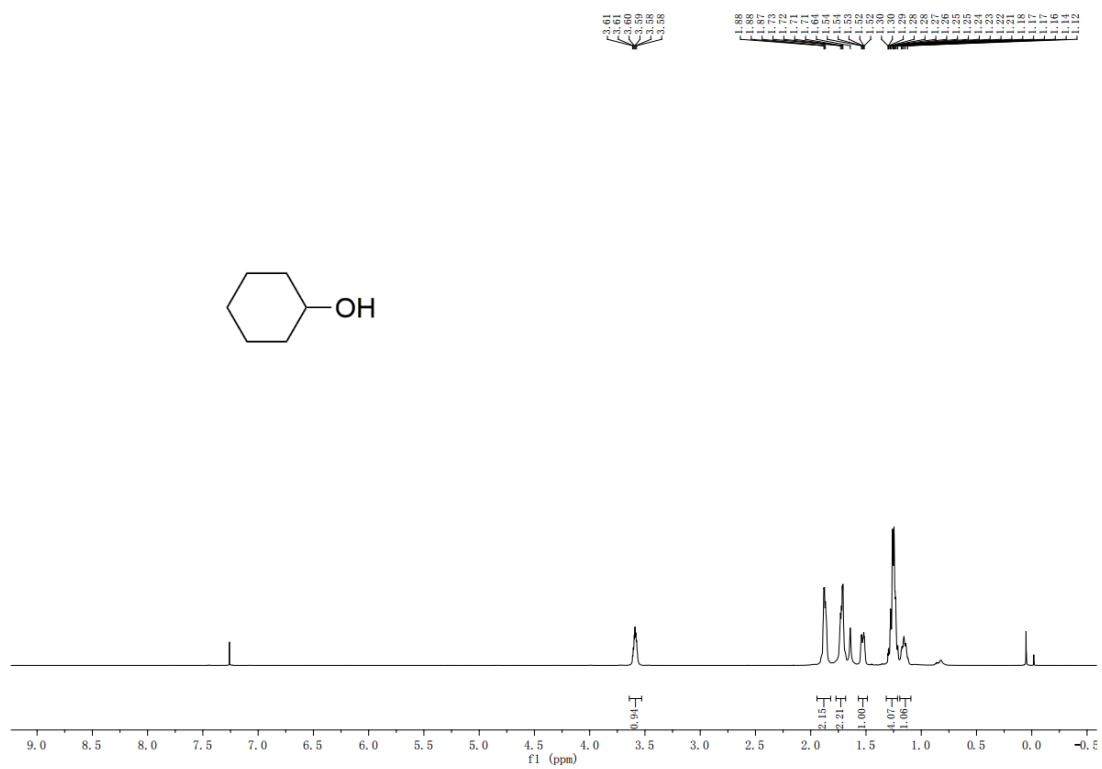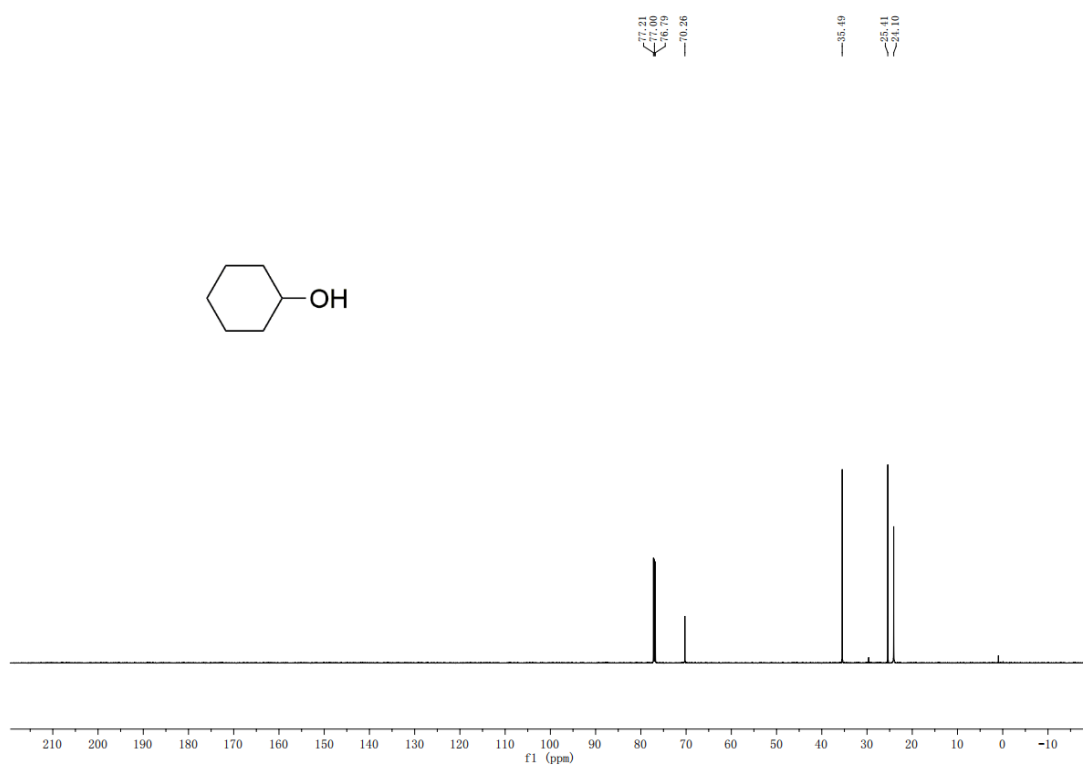

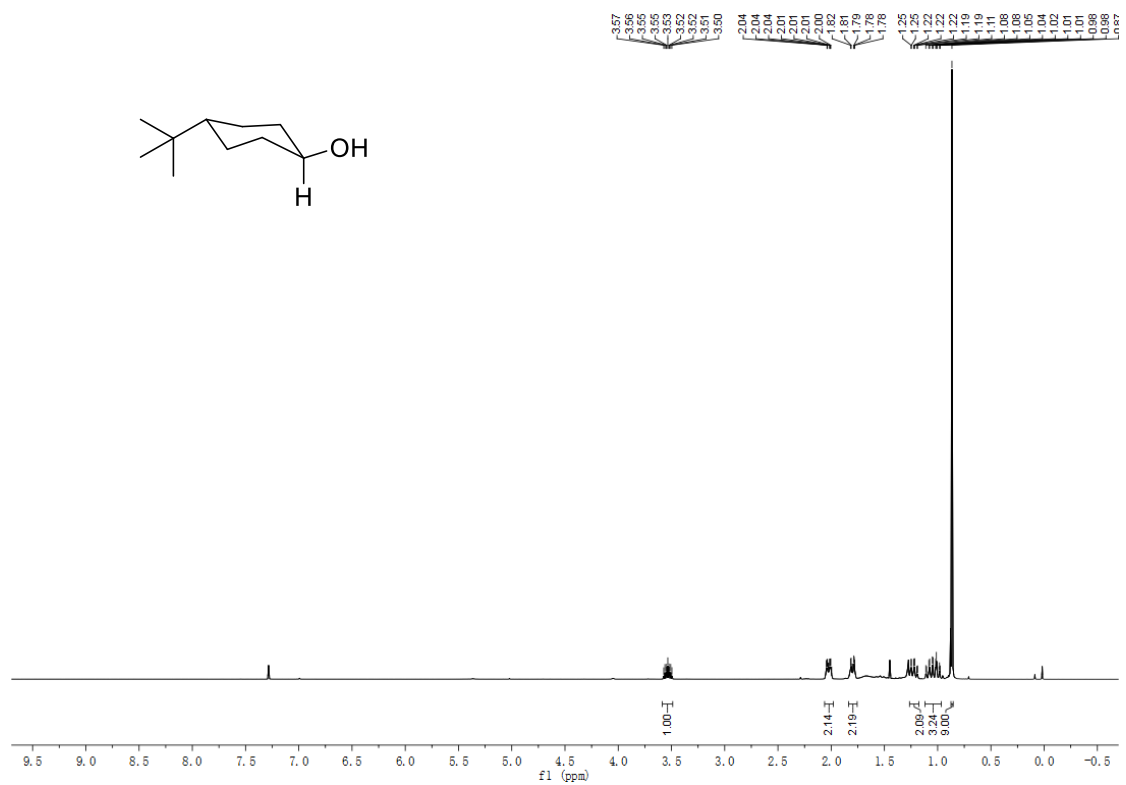

<sup>1</sup>H NMR spectrum of **31** (400MHz, CDCl<sub>3</sub>)

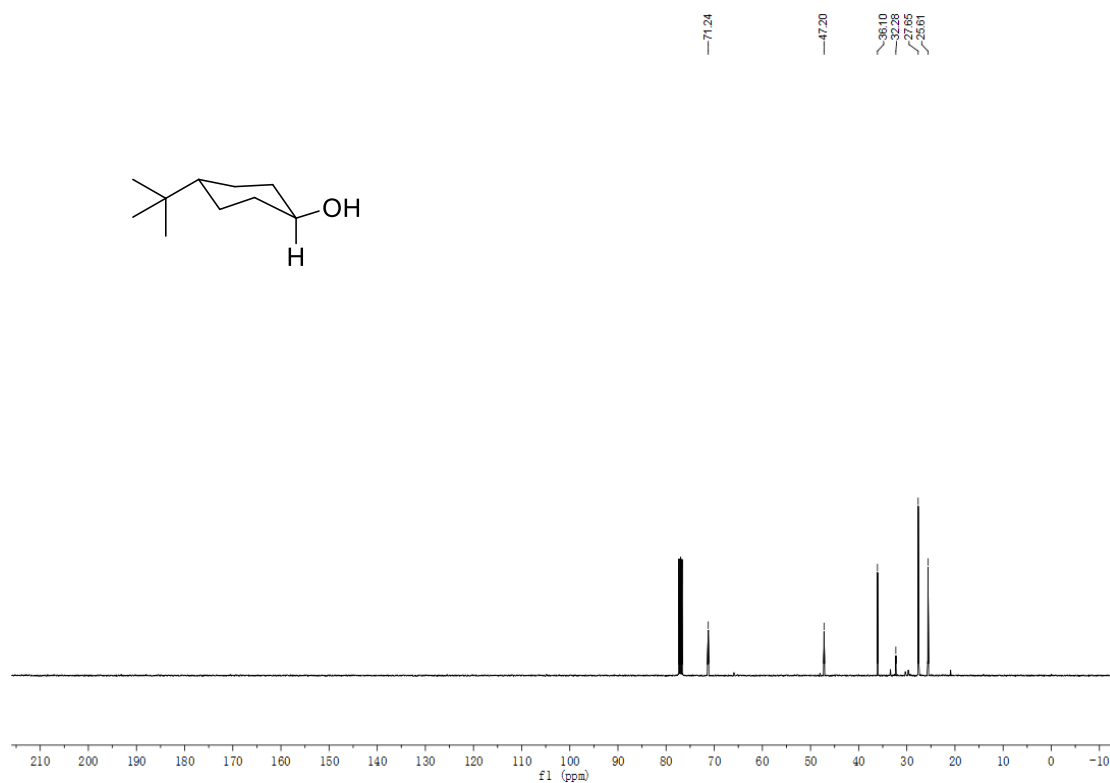

<sup>13</sup>C NMR spectrum of **31** (101MHz, CDCl<sub>3</sub>)



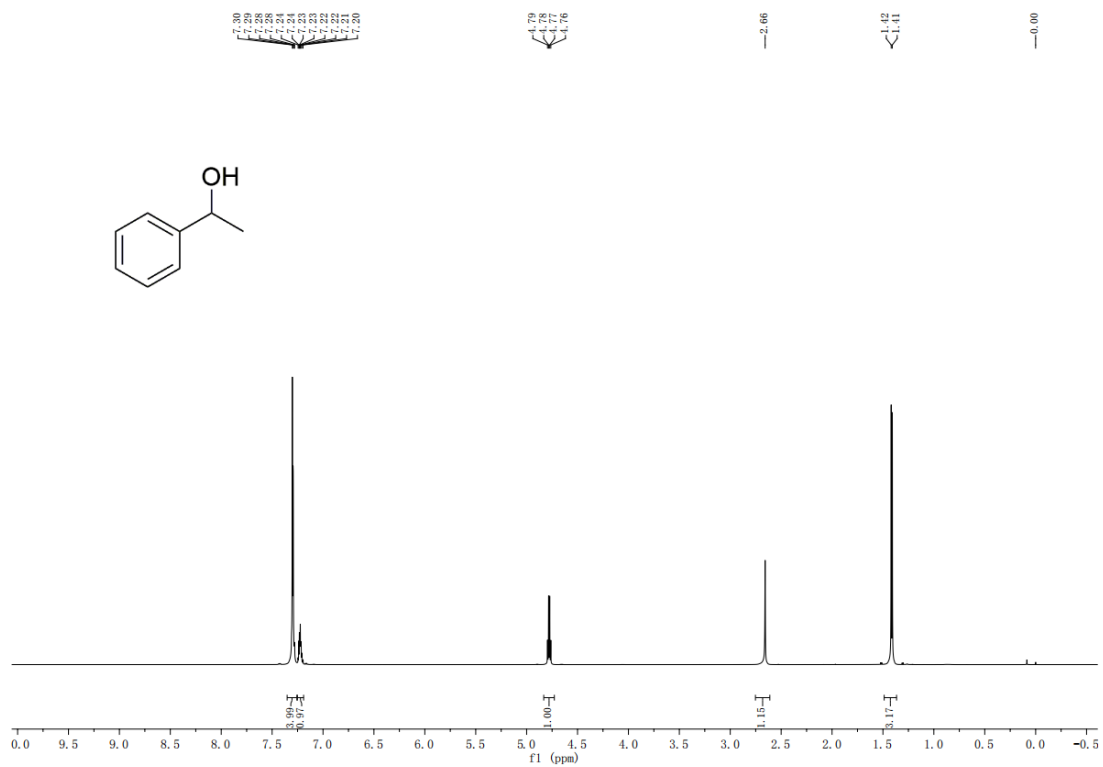

<sup>1</sup>H NMR spectrum of **32** (600MHz, CDCl<sub>3</sub>)

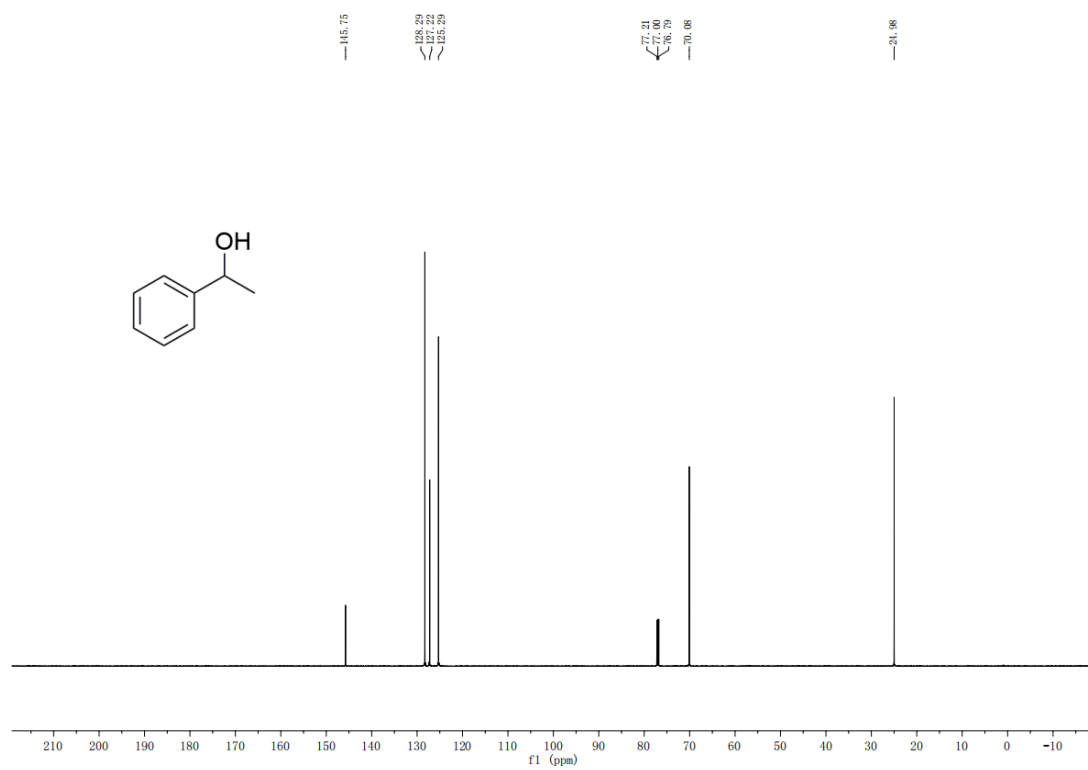

<sup>13</sup>C NMR spectrum of **32** (151MHz, CDCl<sub>3</sub>)

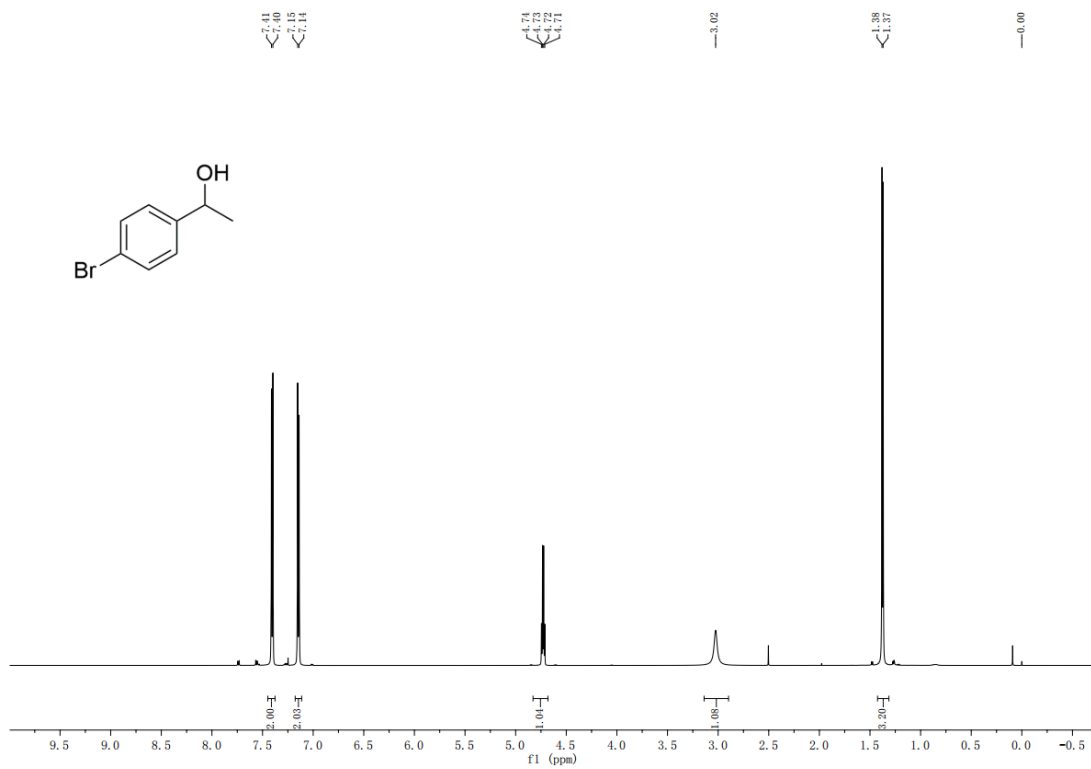

$^1\text{H}$  NMR spectrum of **33** (600MHz,  $\text{CDCl}_3$ )

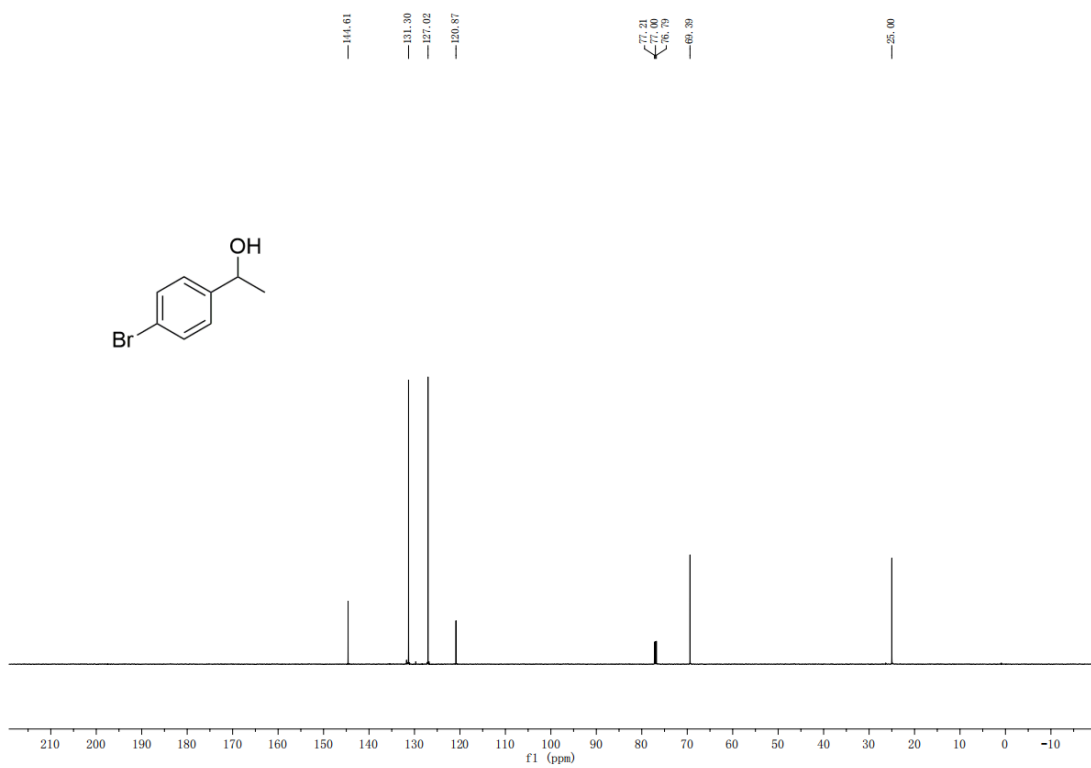

$^{13}\text{C}$  NMR spectrum of **33** (151MHz,  $\text{CDCl}_3$ )

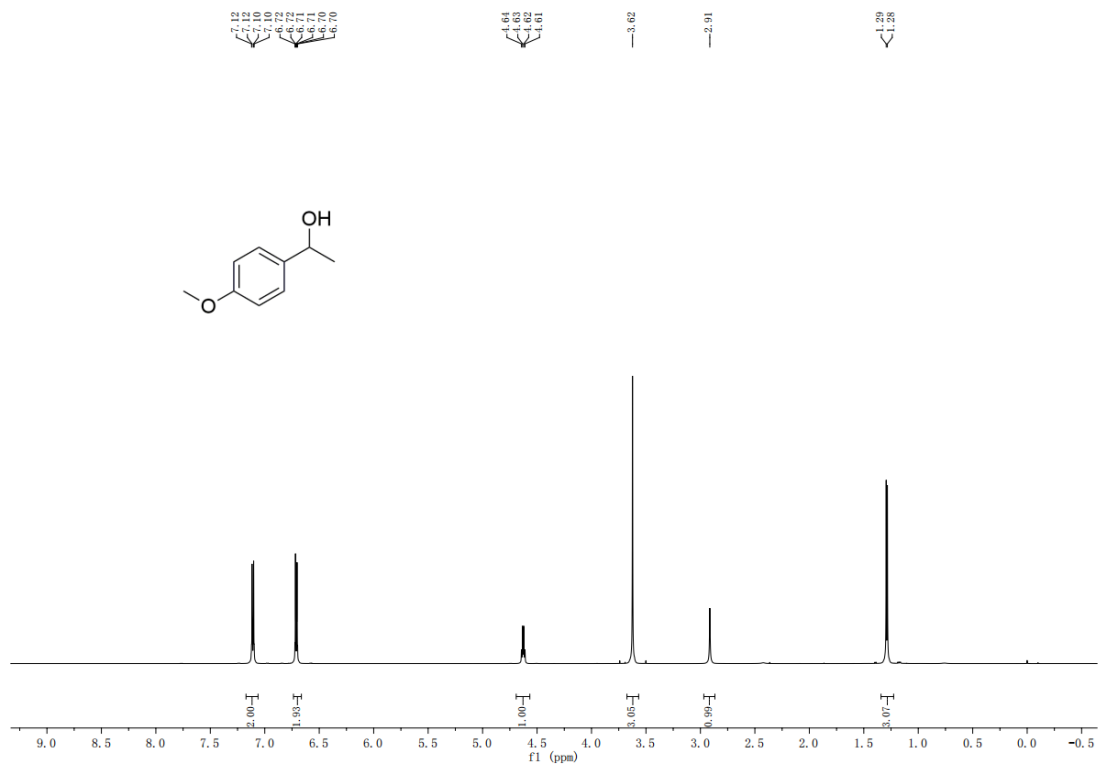

<sup>1</sup>H NMR spectrum of **34** (600MHz, CDCl<sub>3</sub>)

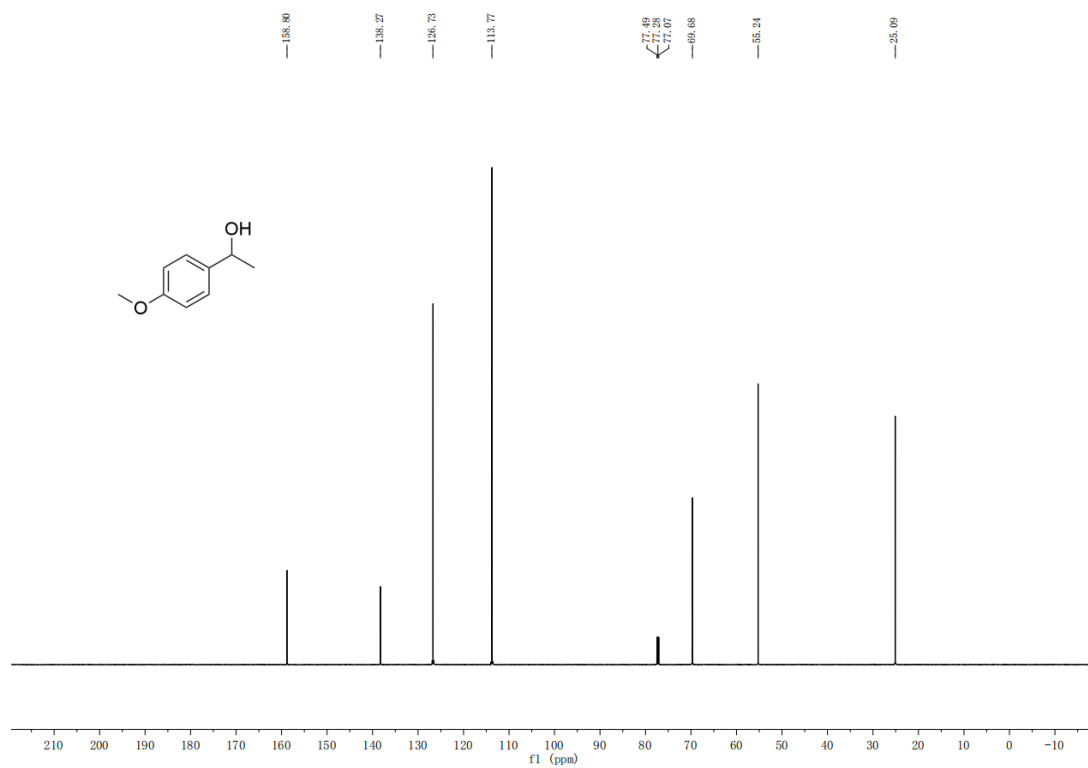

<sup>13</sup>C NMR spectrum of **34** (151MHz, CDCl<sub>3</sub>)

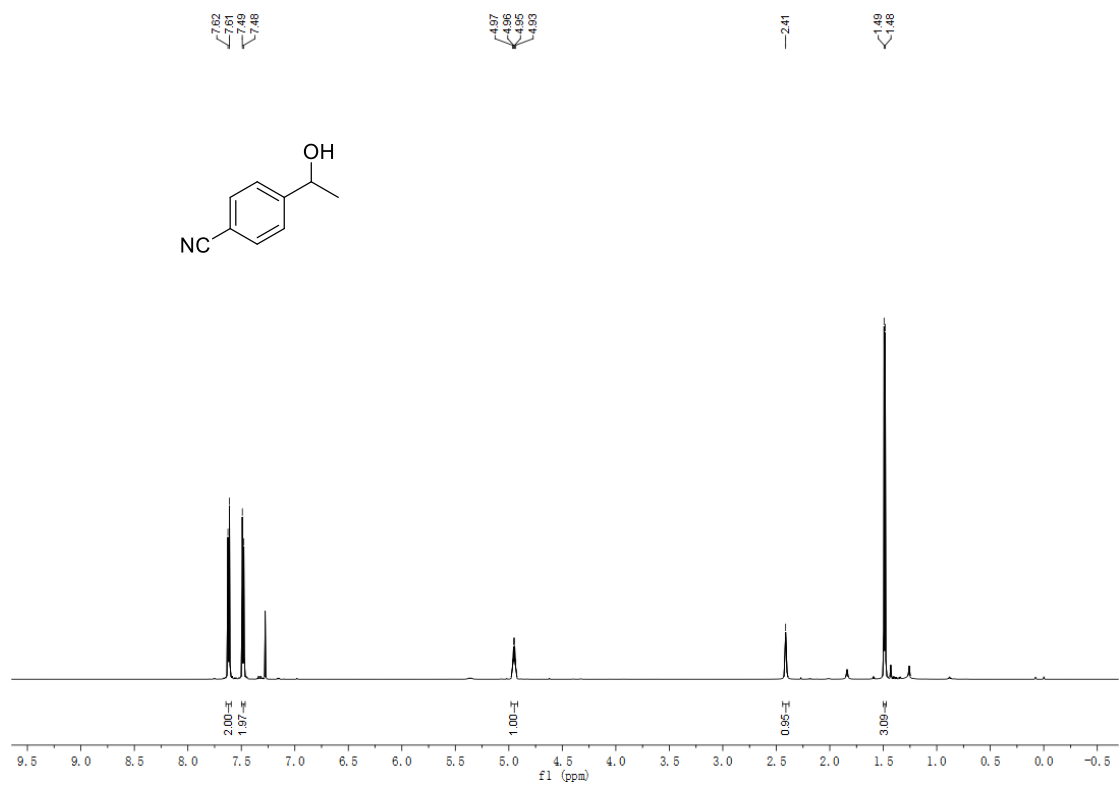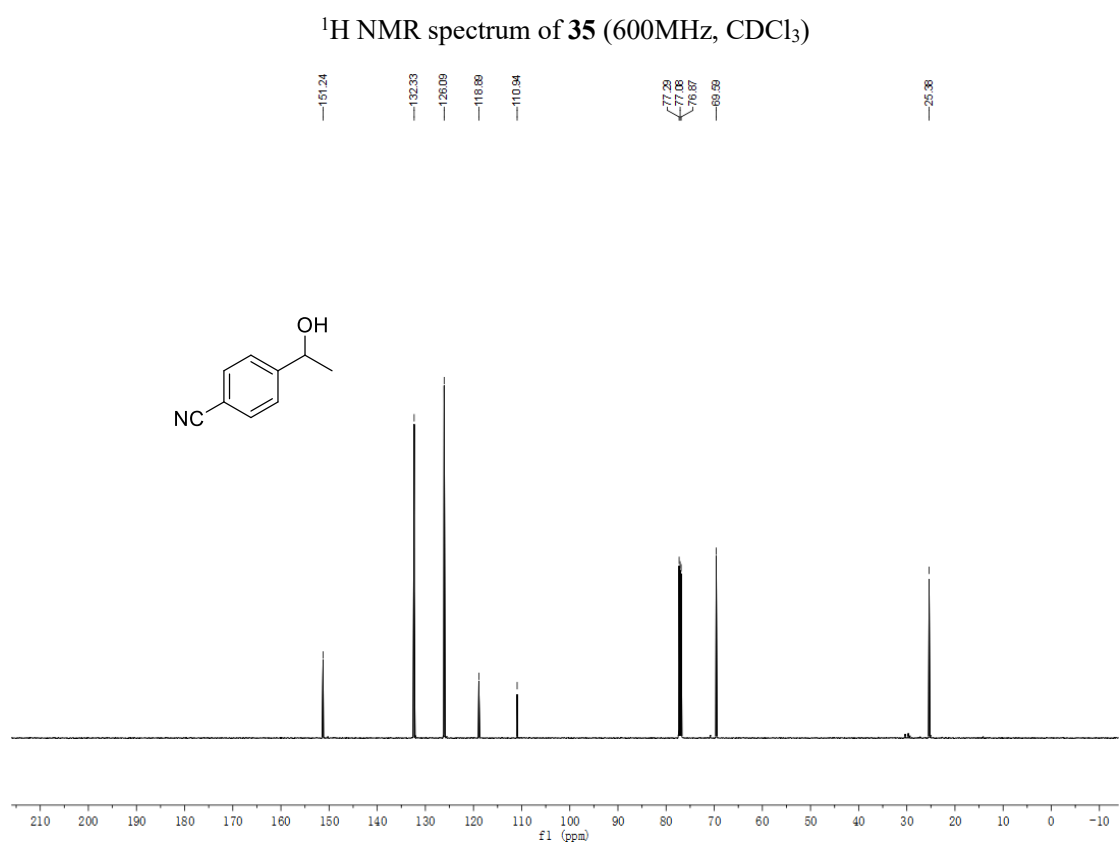

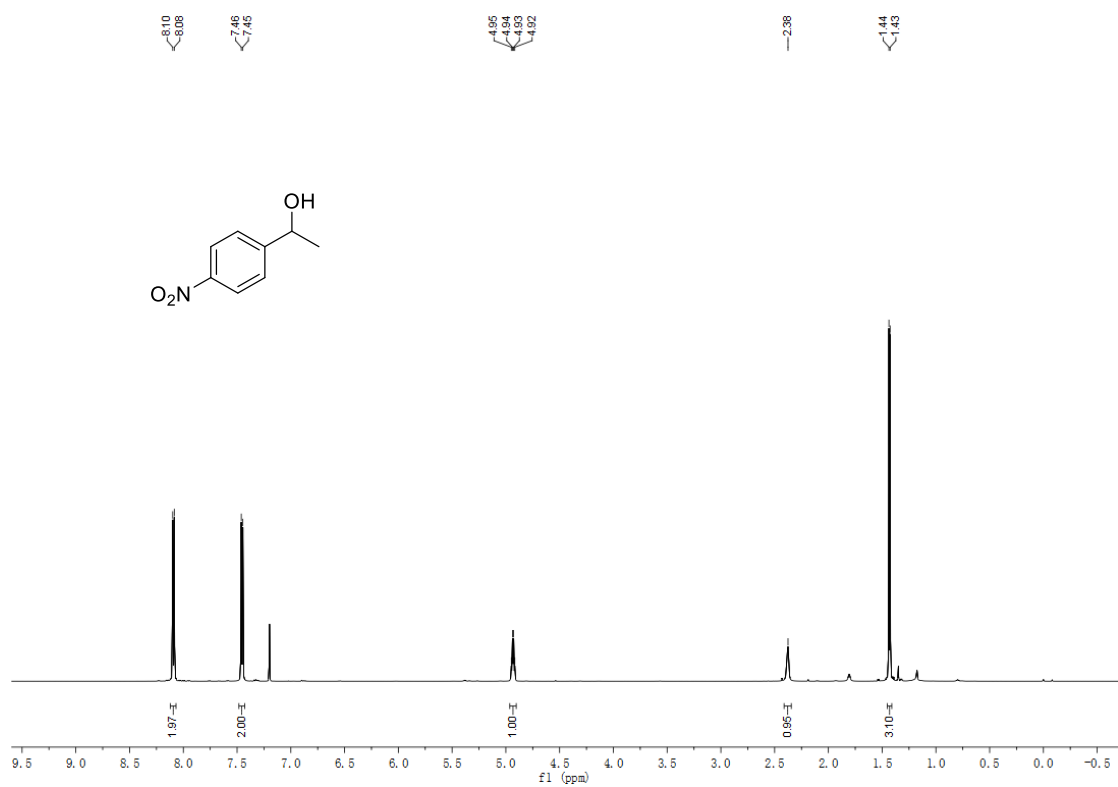

<sup>1</sup>H NMR spectrum of **36** (600MHz, CDCl<sub>3</sub>)

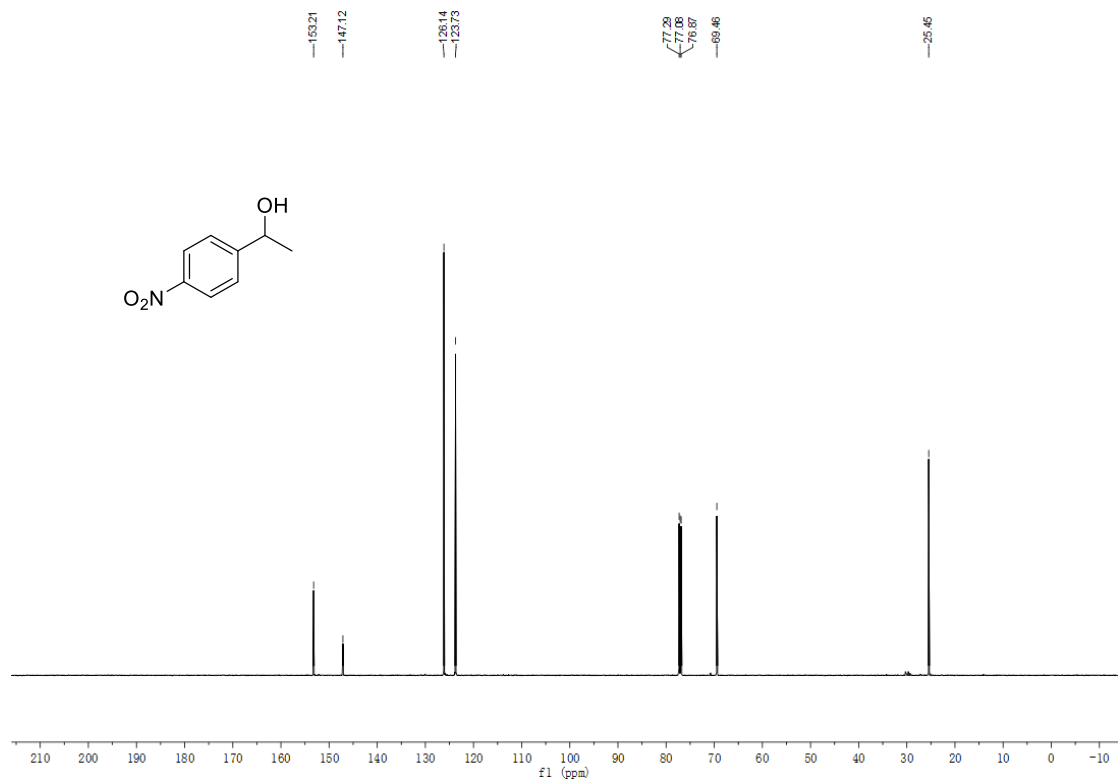

<sup>13</sup>C NMR spectrum of **36** (151MHz, CDCl<sub>3</sub>)

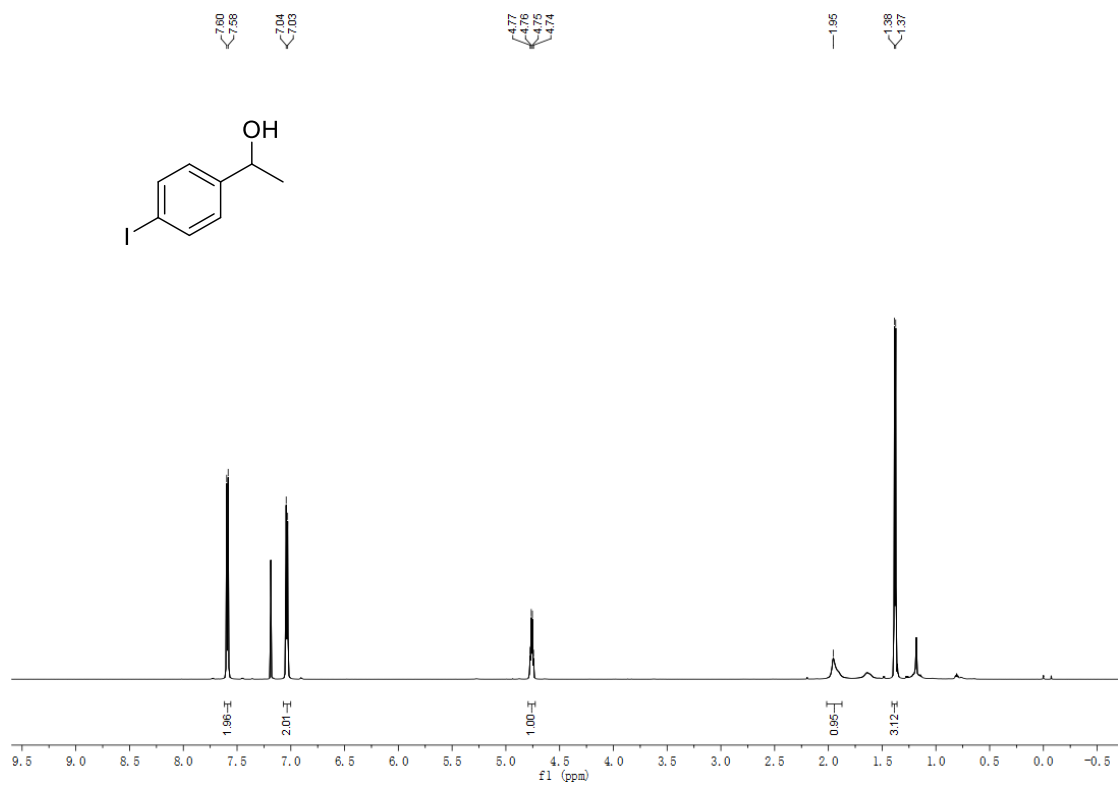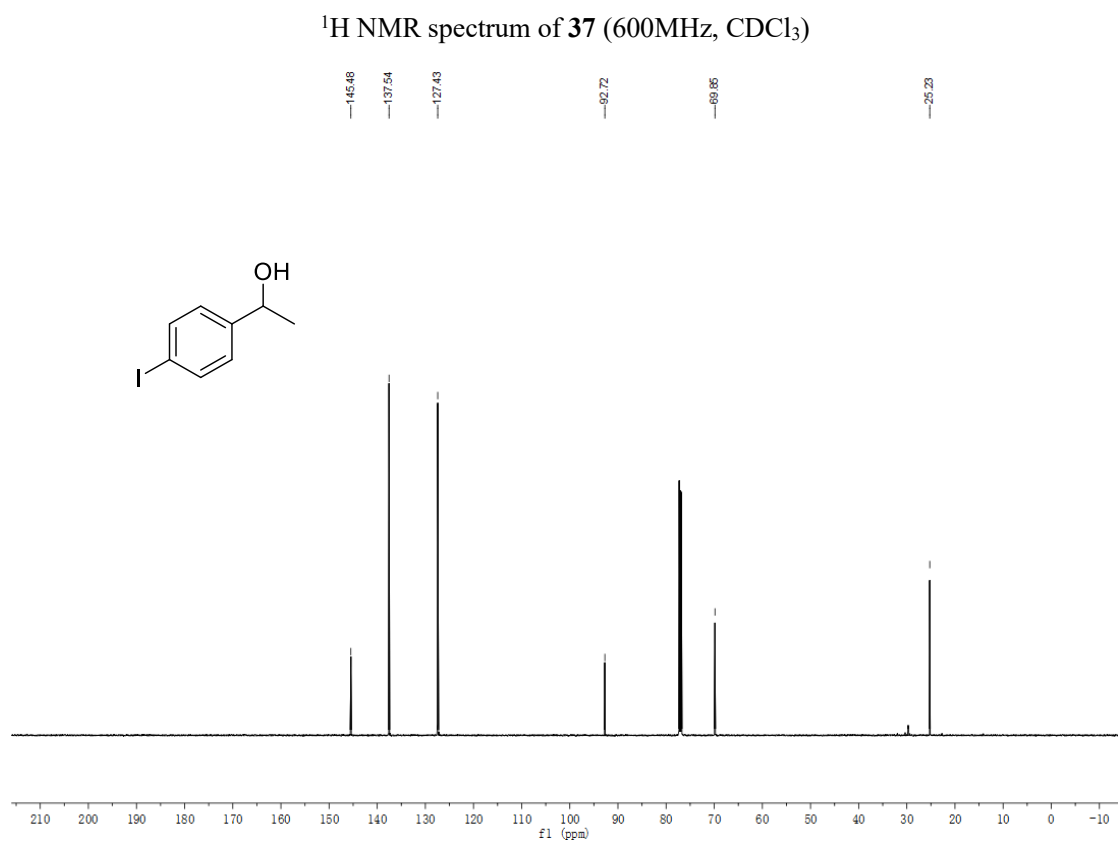

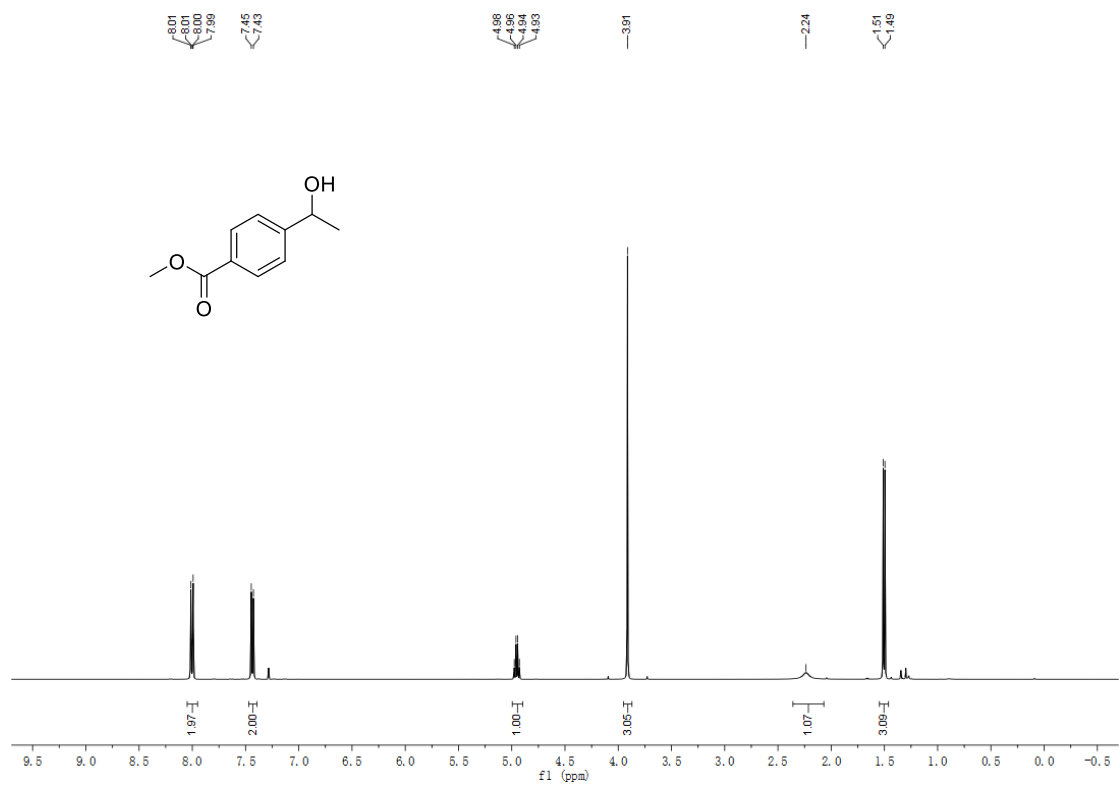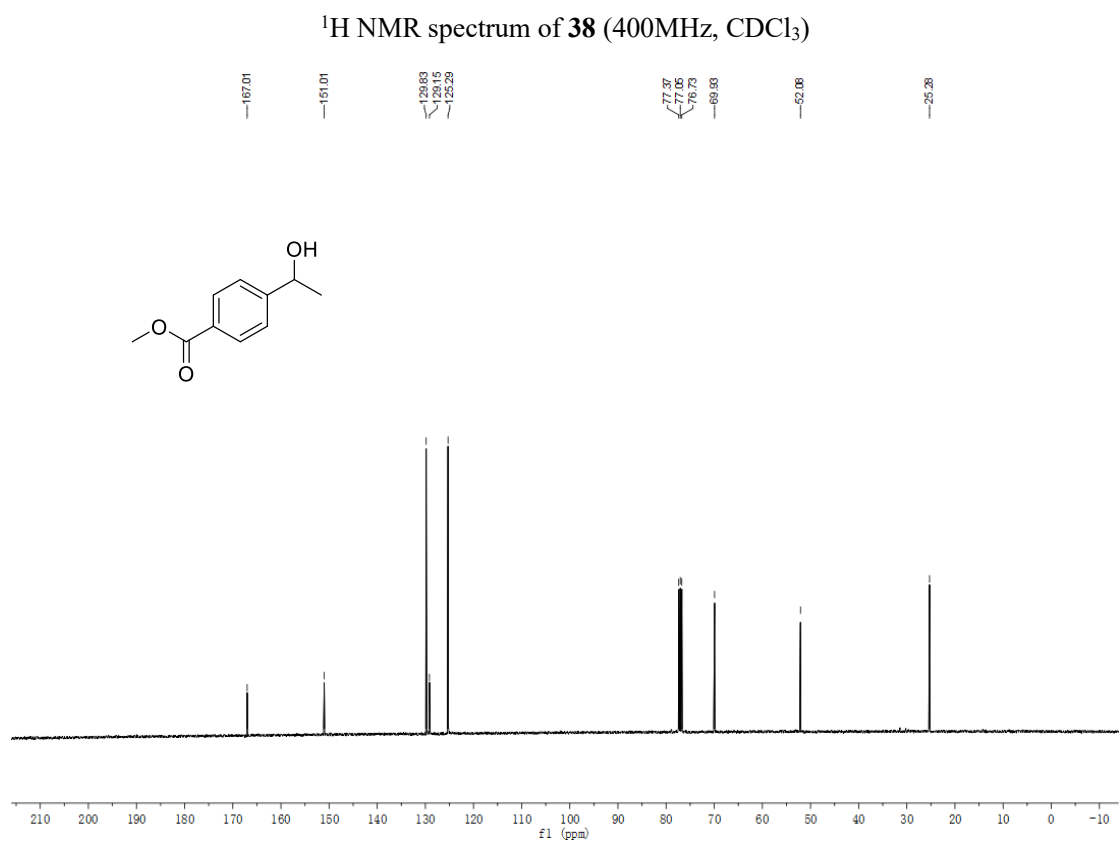

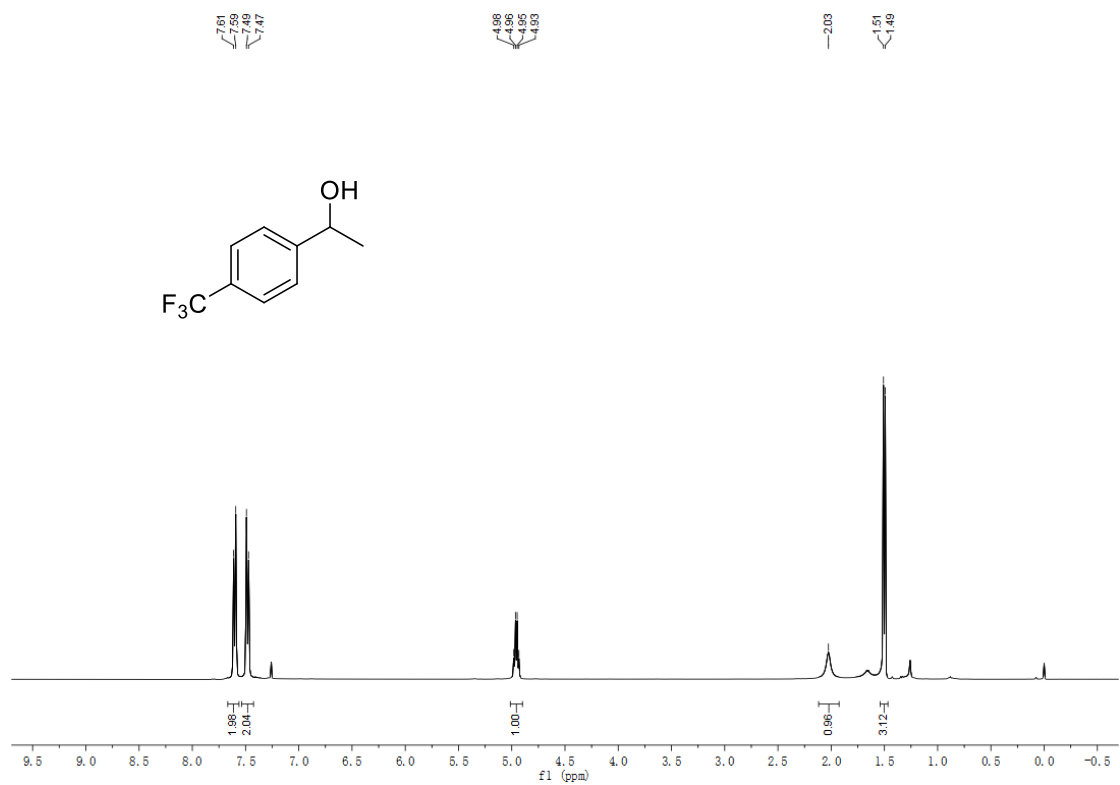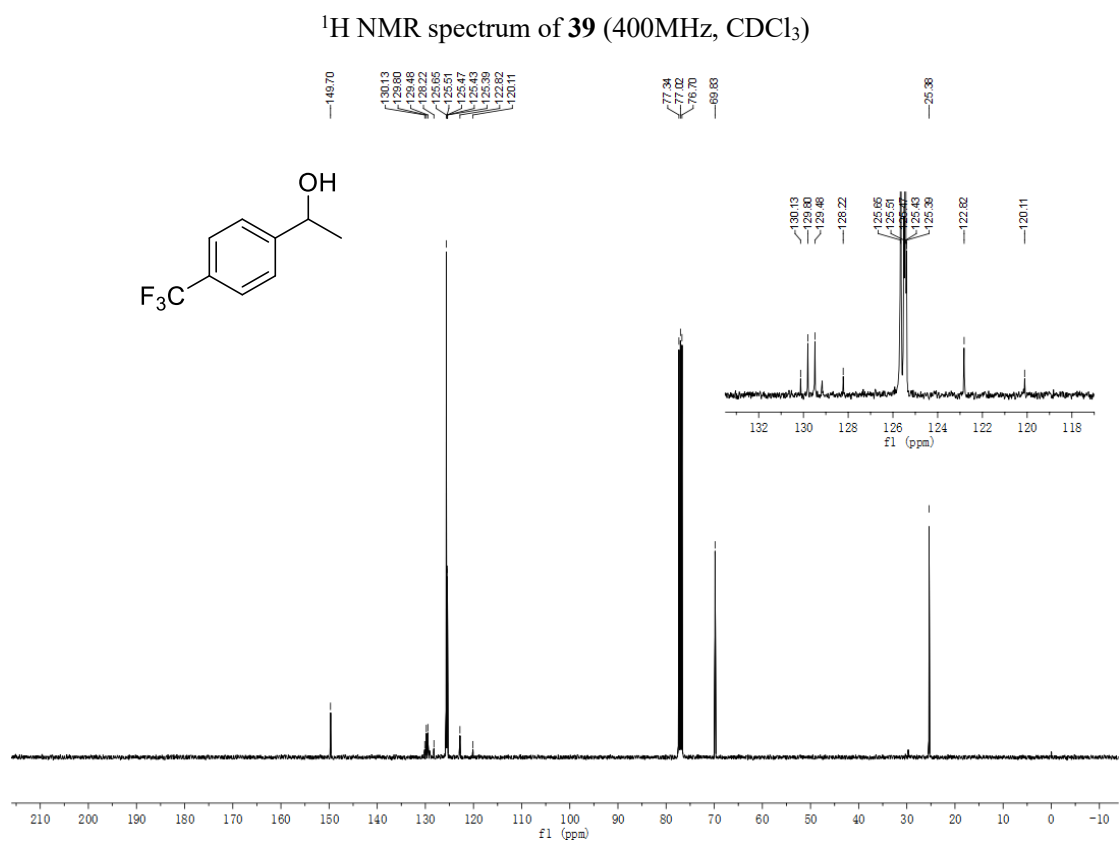



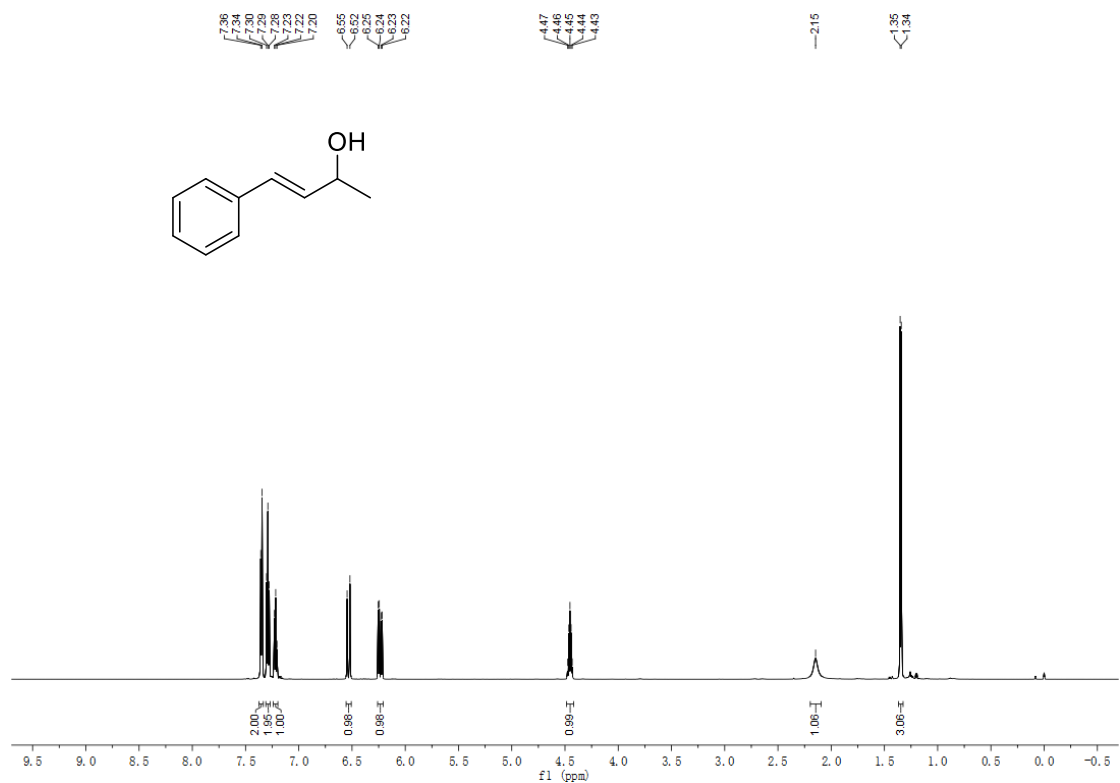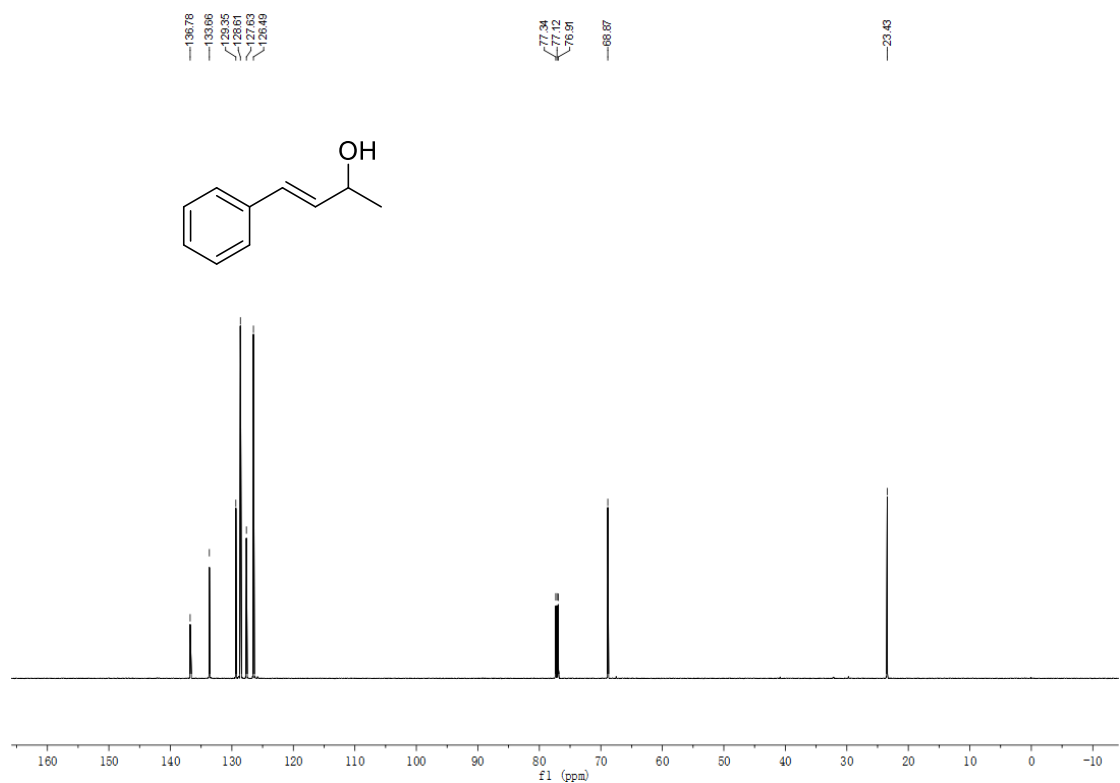

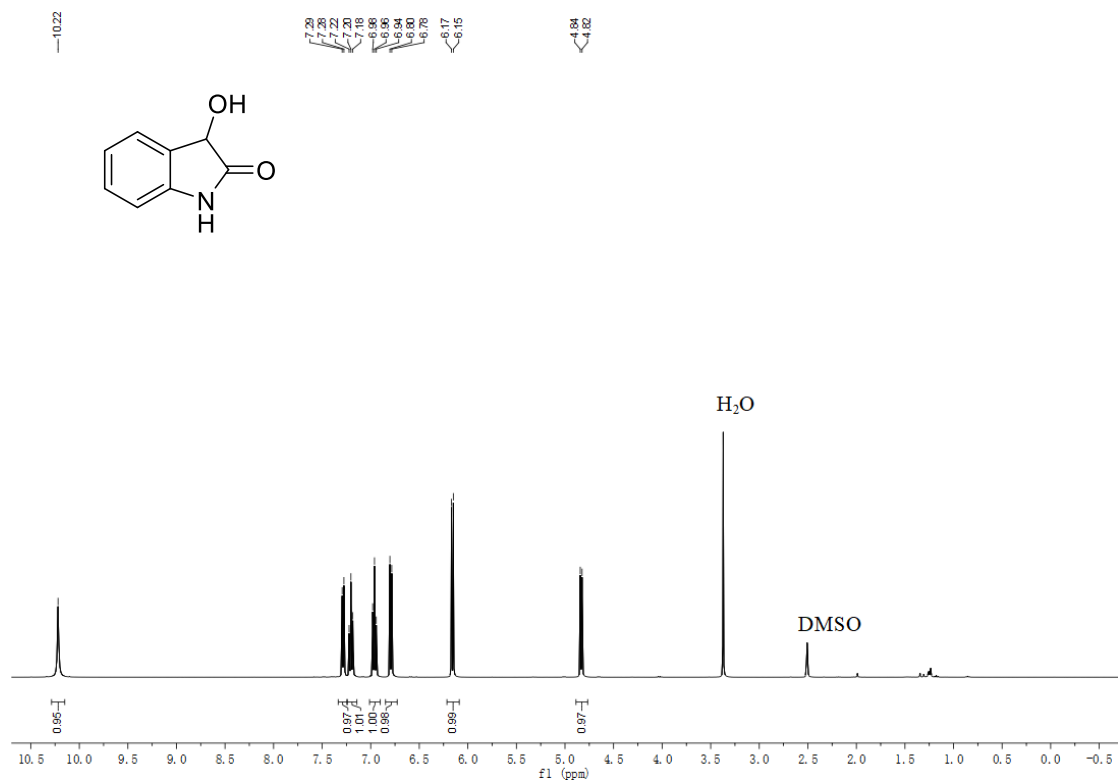

$^1\text{H}$  NMR spectrum of **41** (400MHz, DMSO)

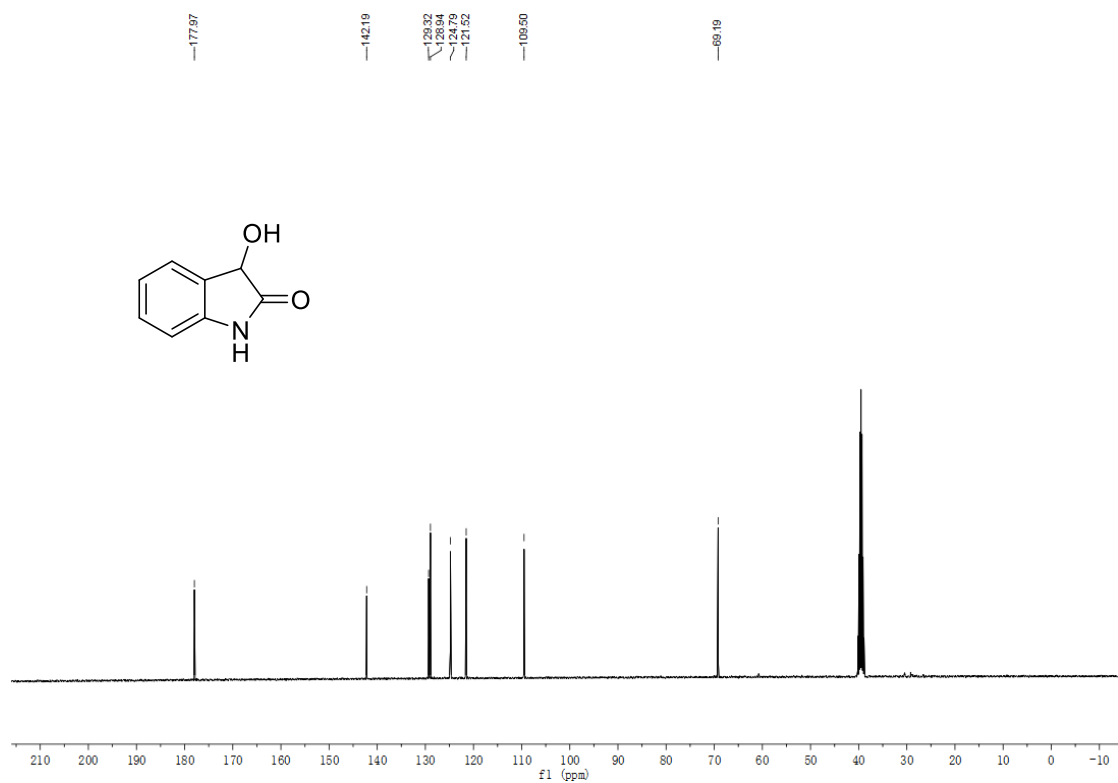

$^{13}\text{C}$  NMR spectrum of **41** (101MHz, DMSO)

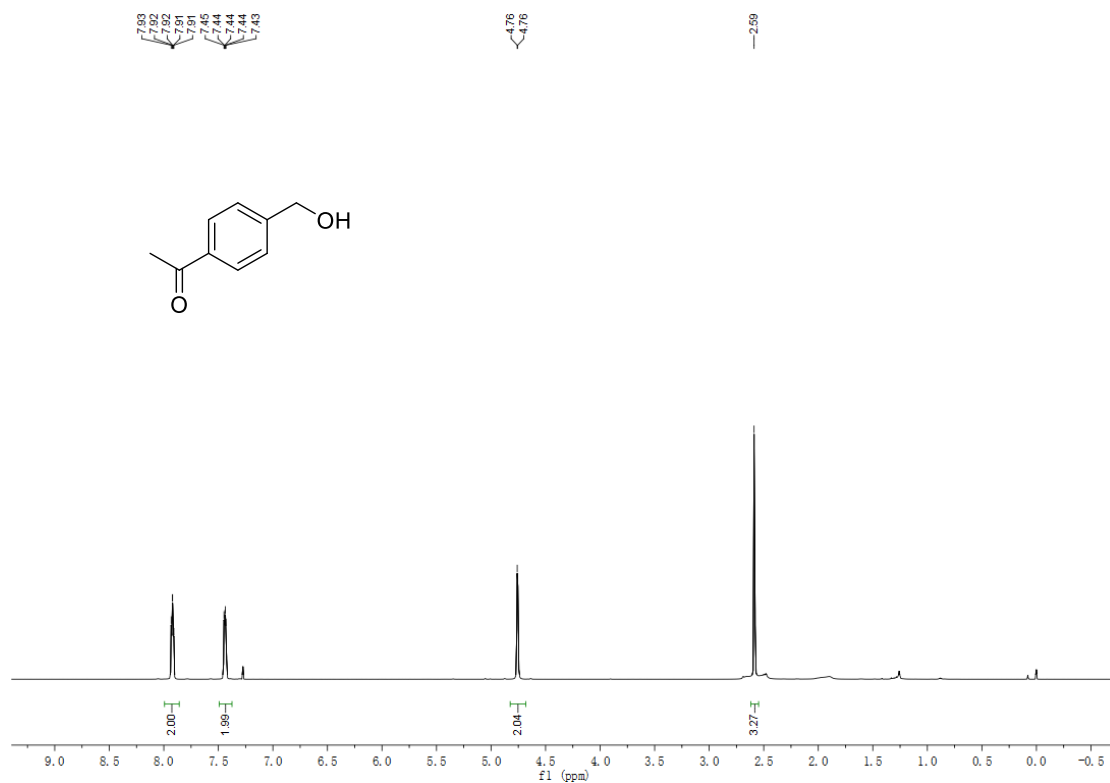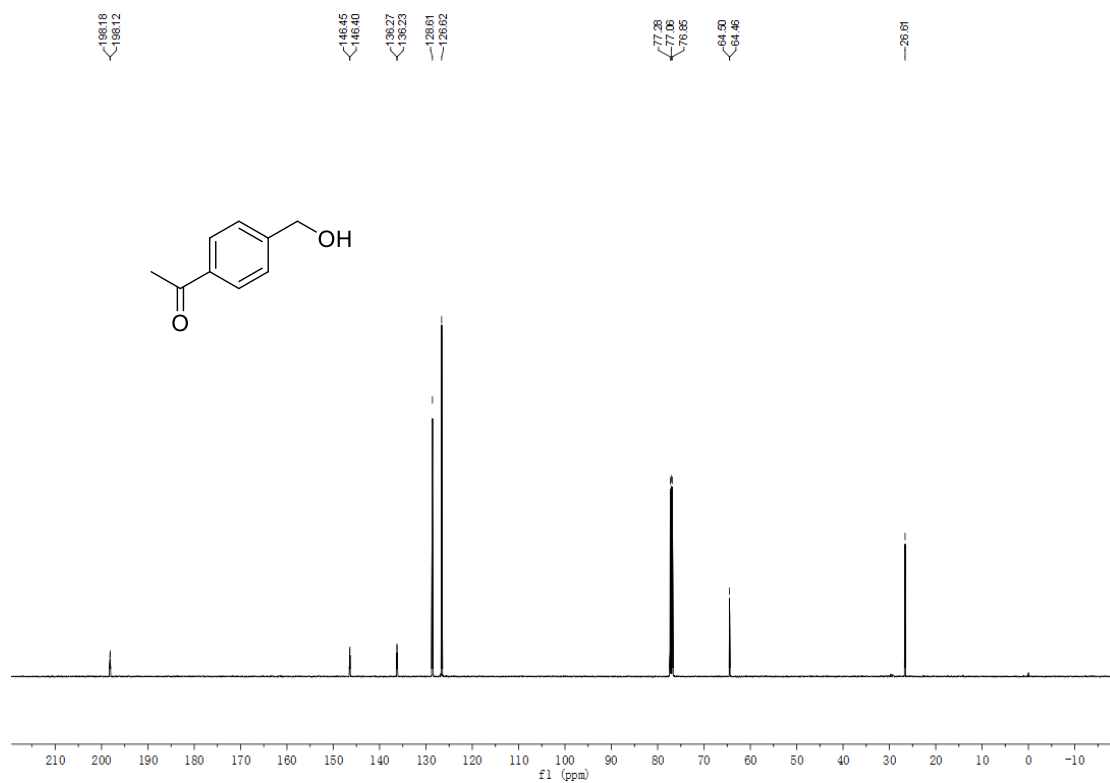

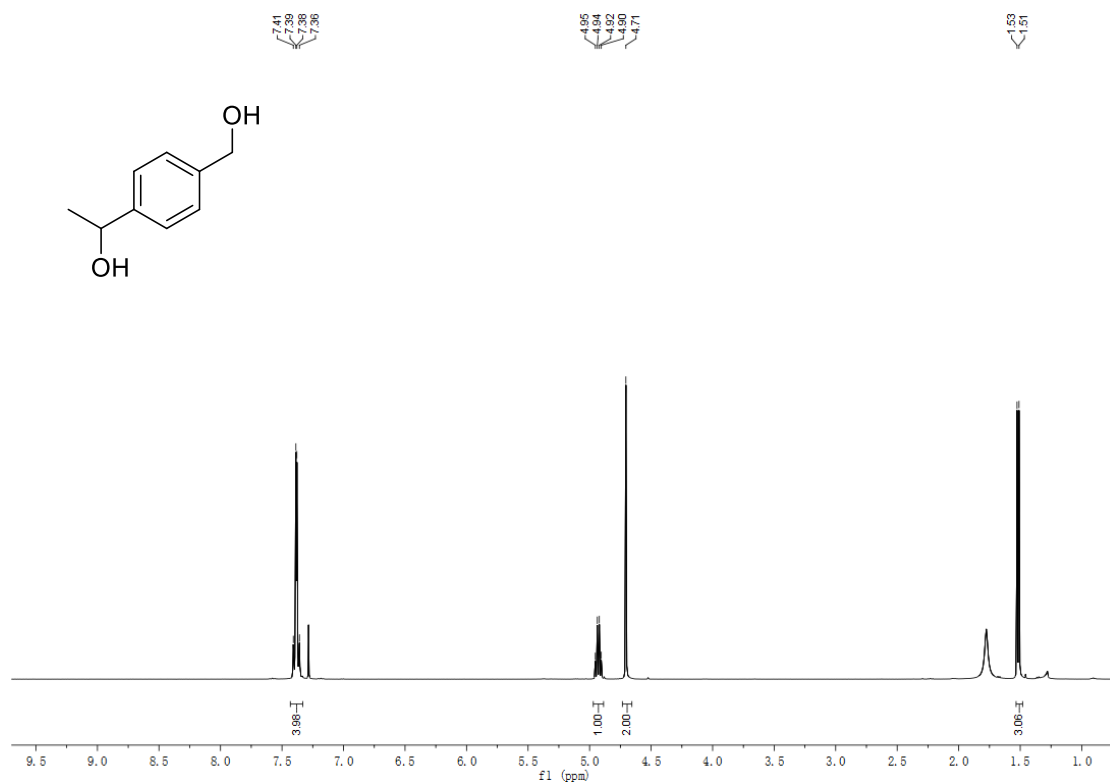

$^1\text{H}$  NMR spectrum of **43** (400MHz,  $\text{CDCl}_3$ )

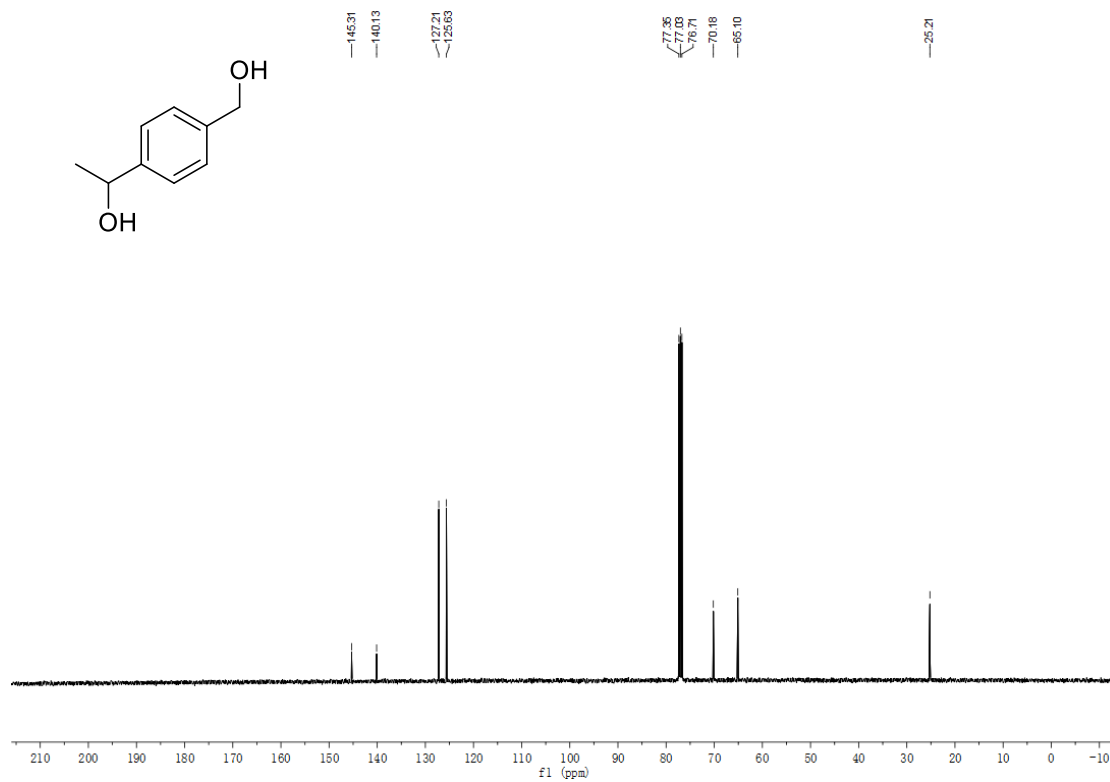

$^{13}\text{C}$  NMR spectrum of **43** (101MHz,  $\text{CDCl}_3$ )

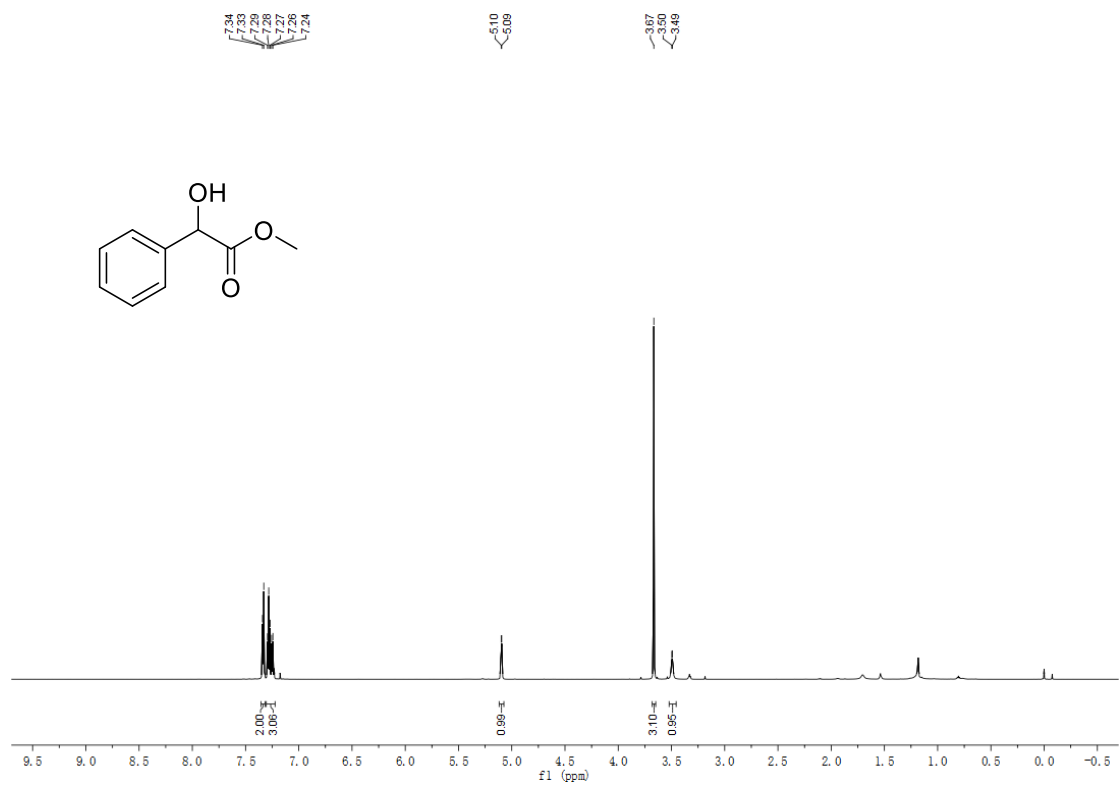

$^1\text{H}$  NMR spectrum of **44** (600MHz,  $\text{CDCl}_3$ )

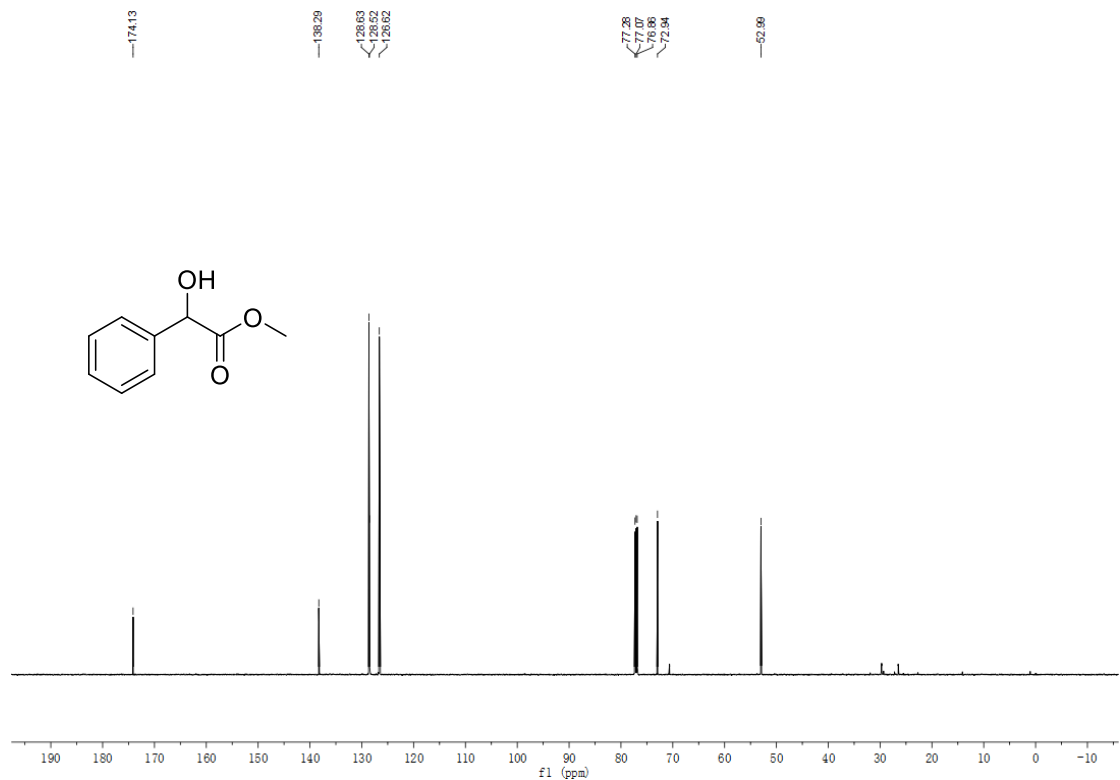

$^{13}\text{C}$  NMR spectrum of **44** (151MHz,  $\text{CDCl}_3$ )

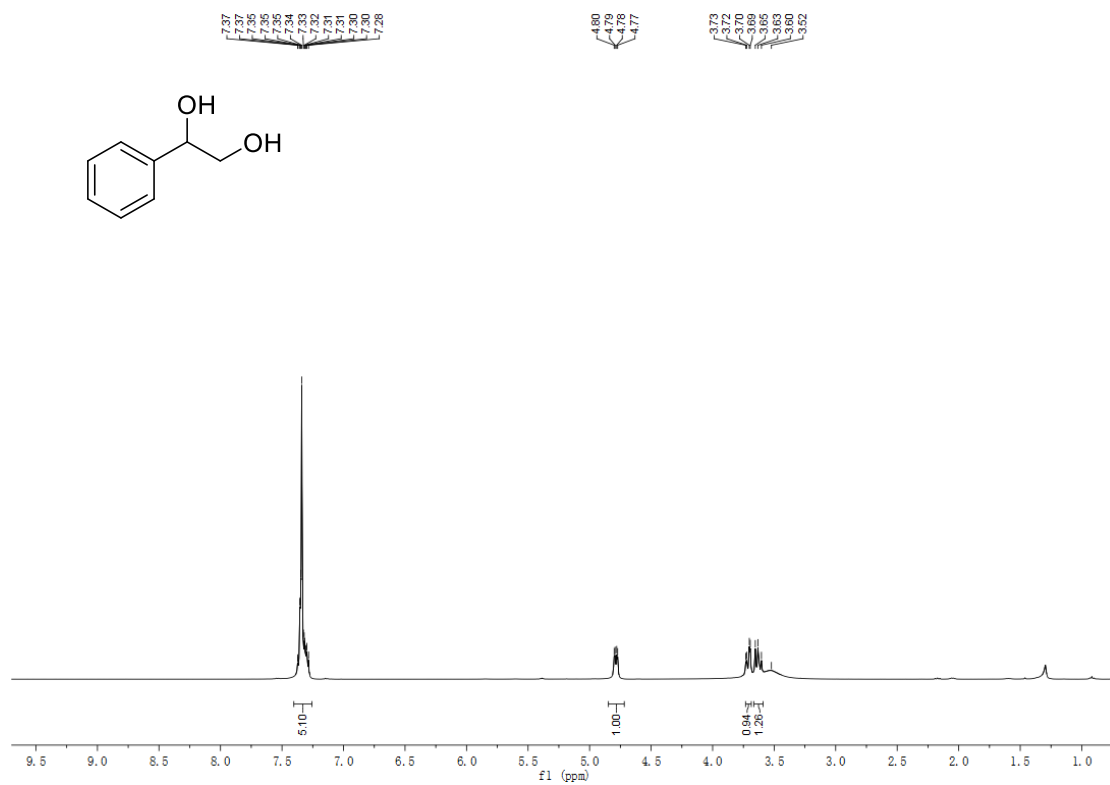

$^1\text{H}$  NMR spectrum of **45** (400MHz,  $\text{CDCl}_3$ )

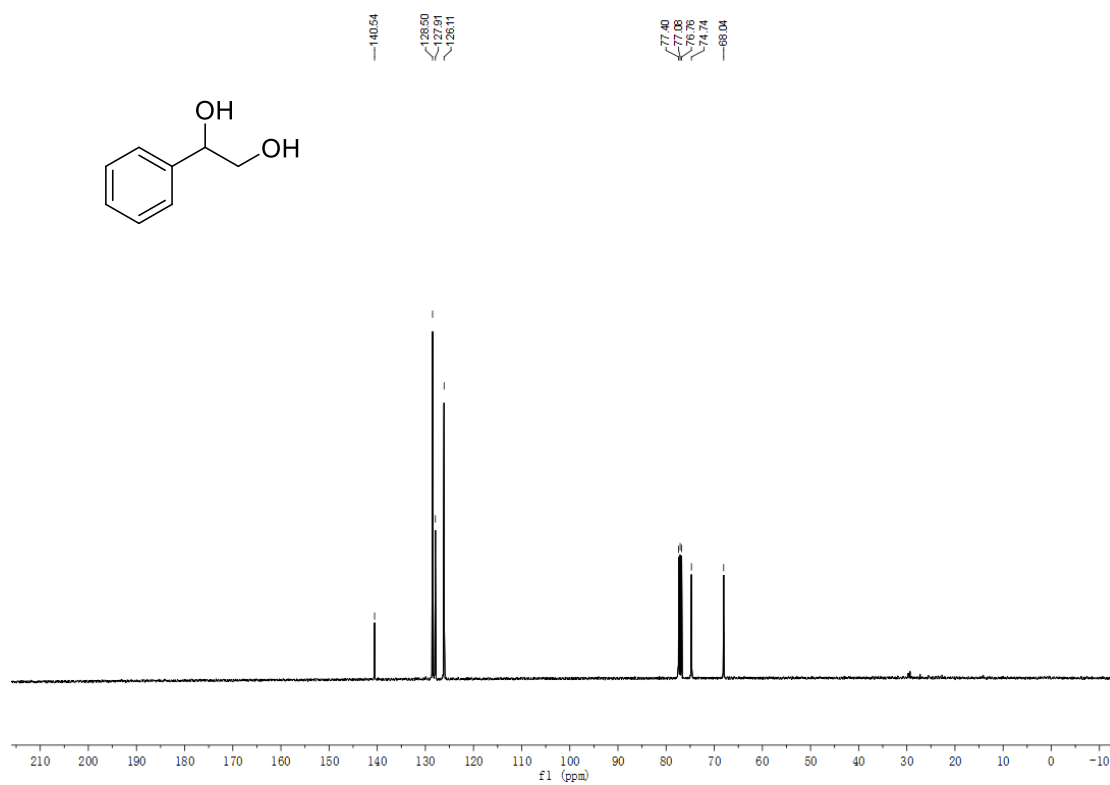

$^{13}\text{C}$  NMR spectrum of **45** (101MHz,  $\text{CDCl}_3$ )

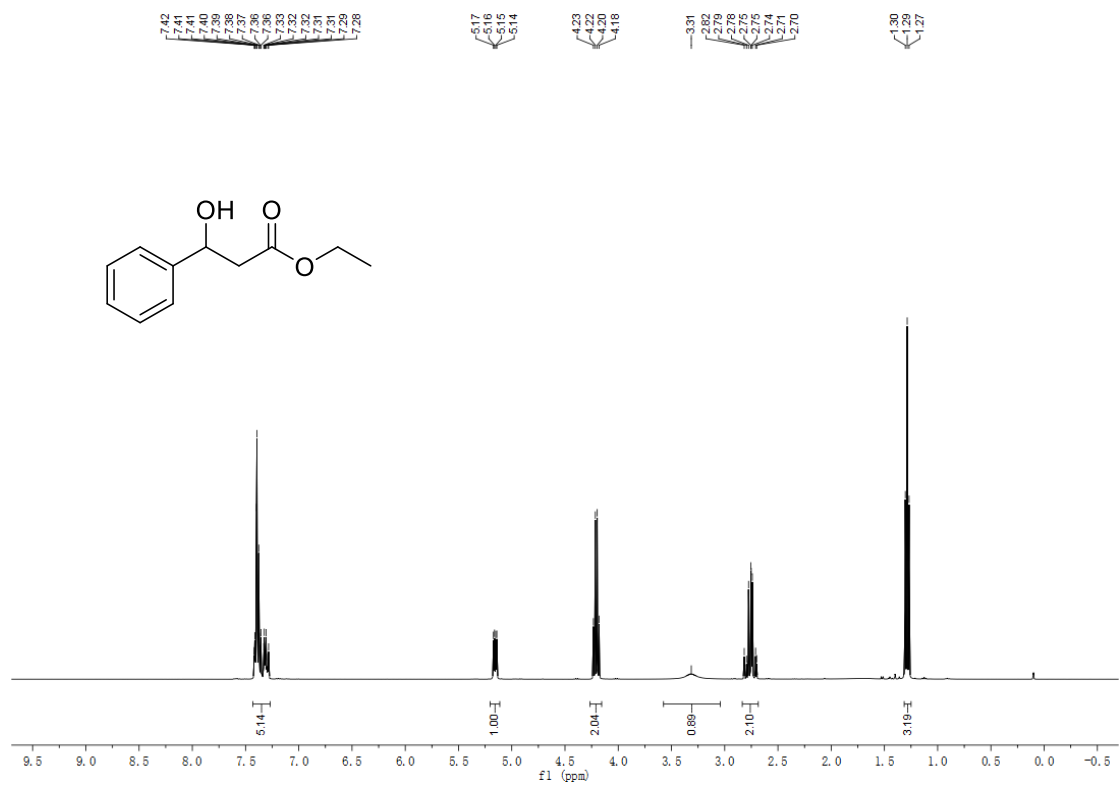

<sup>1</sup>H NMR spectrum of 46 (400MHz, CDCl<sub>3</sub>)

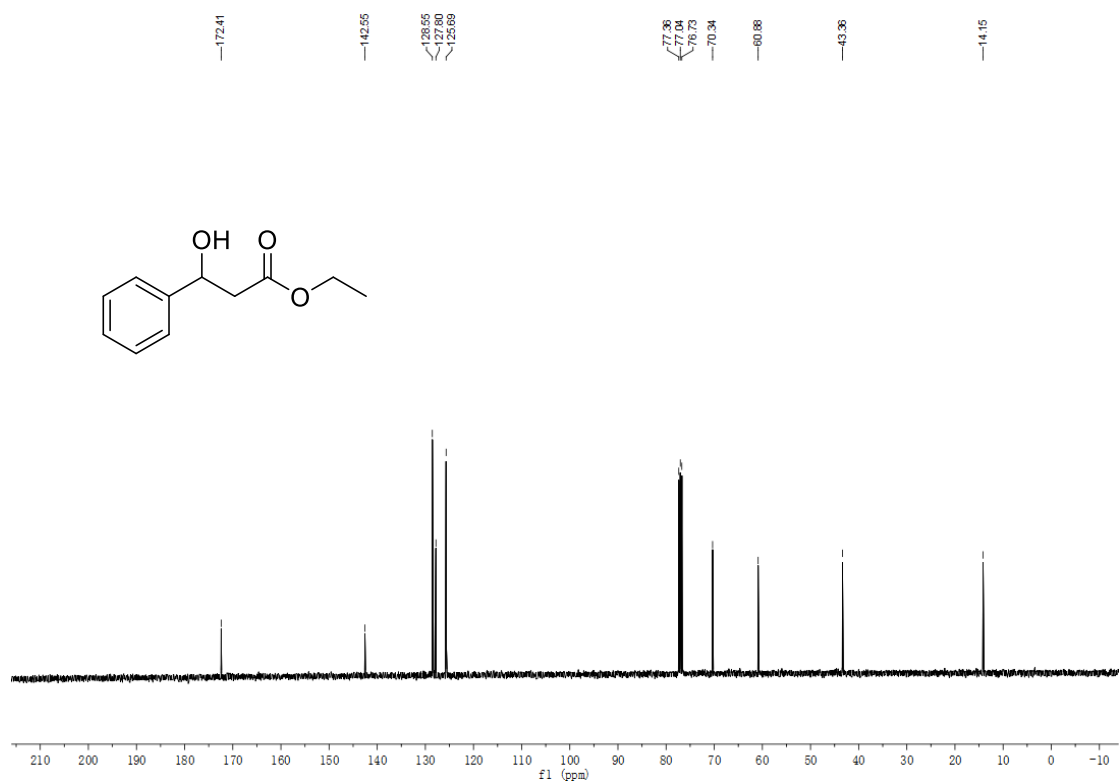

<sup>13</sup>C NMR spectrum of 46 (101MHz, CDCl<sub>3</sub>)

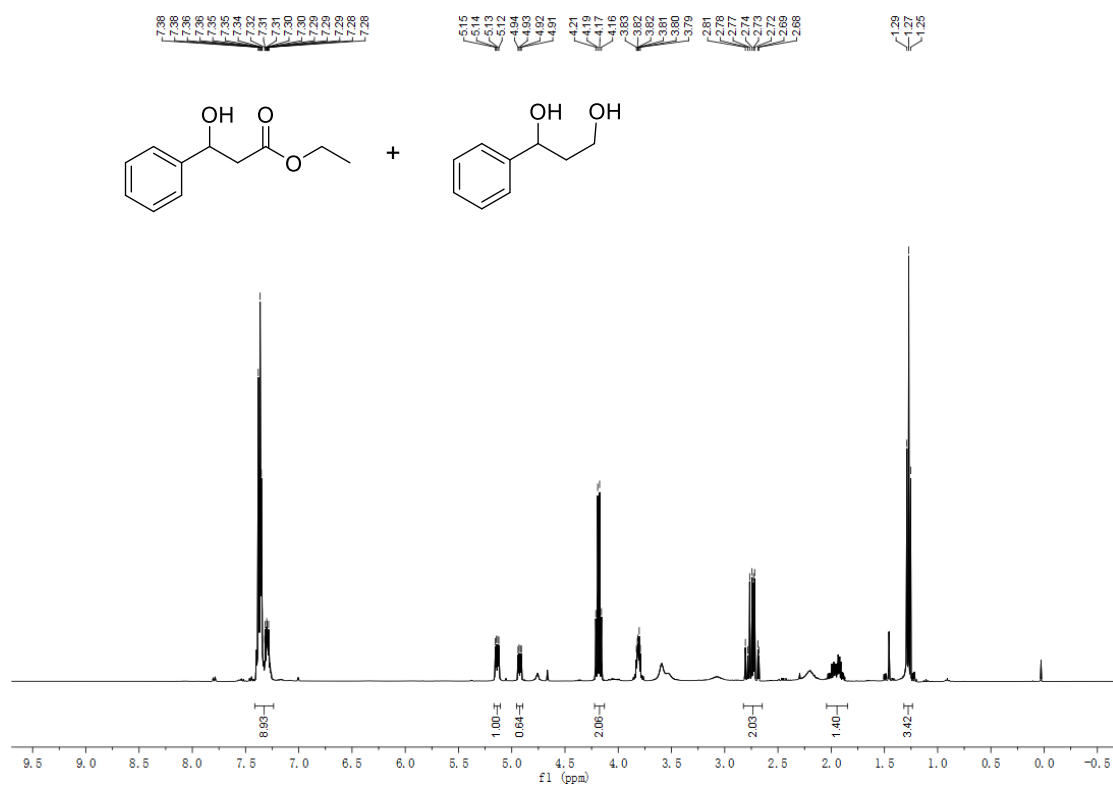

<sup>1</sup>H NMR spectrum of **46**, **47** (600MHz, CDCl<sub>3</sub>)
